# Supplementary material for: Expansion and Refinement of Deep Sequence-Coupled Biopanning Technology for Epitope-Specific Antibody Responses in Human Serum
Source: PubMed Central journal article supplement (PMC7600589; doi:10.3390/v12101114), 2020-09-30

# Patient 1

## Full Alignment

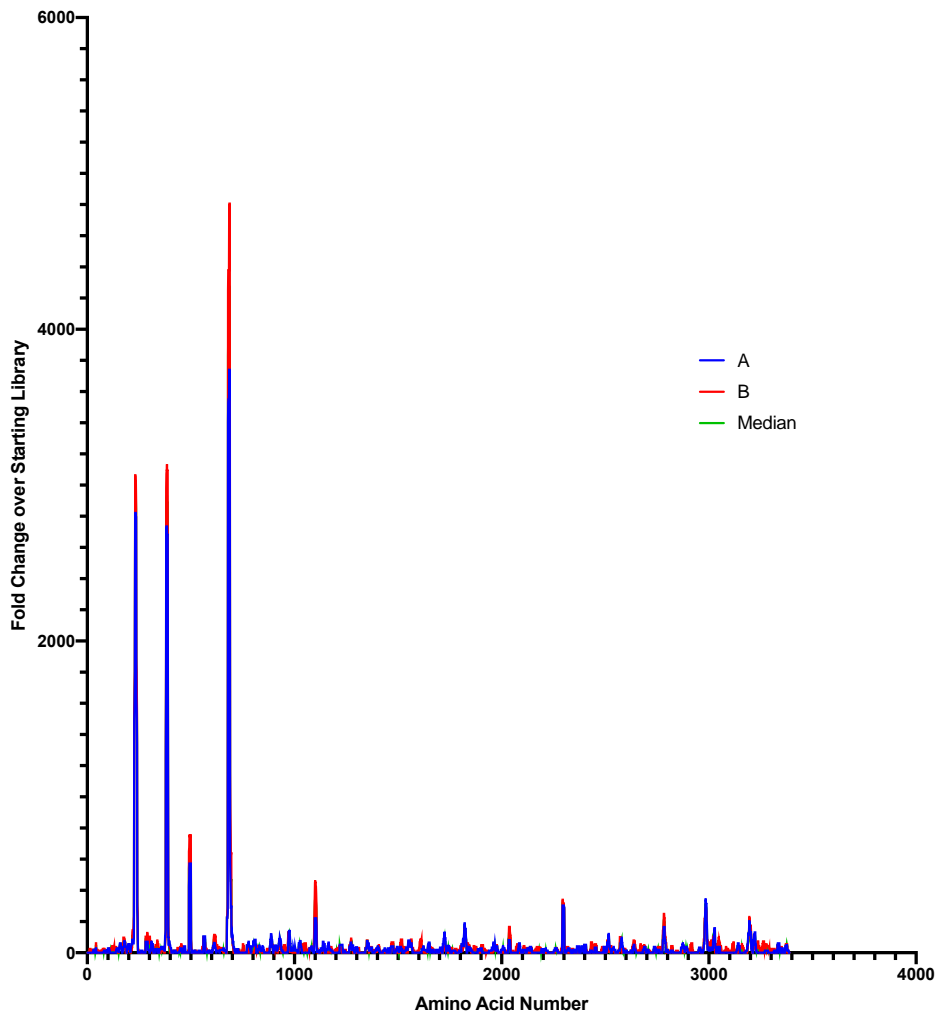

## Envelope

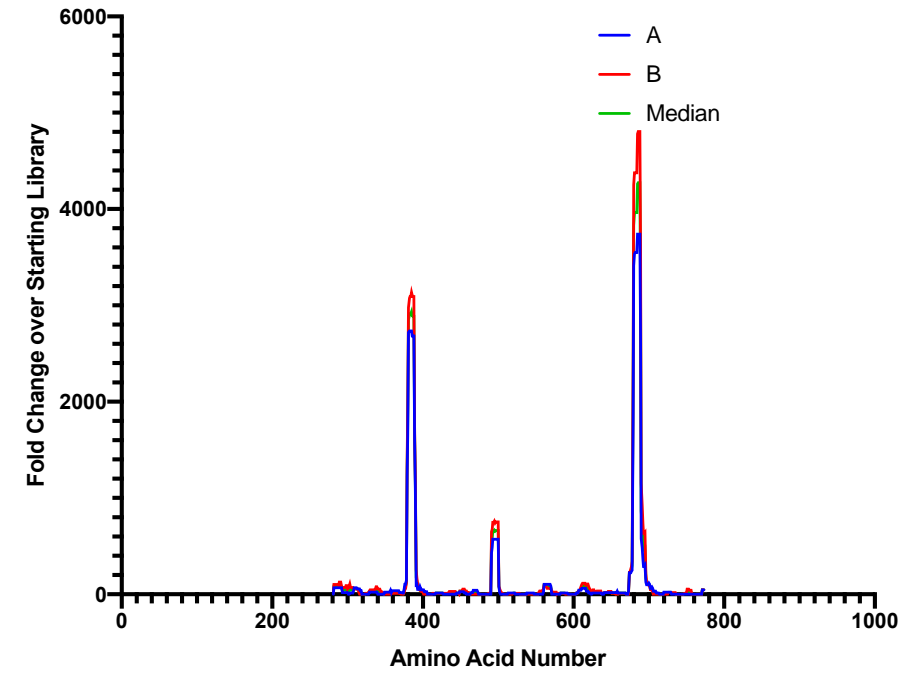

## NS1

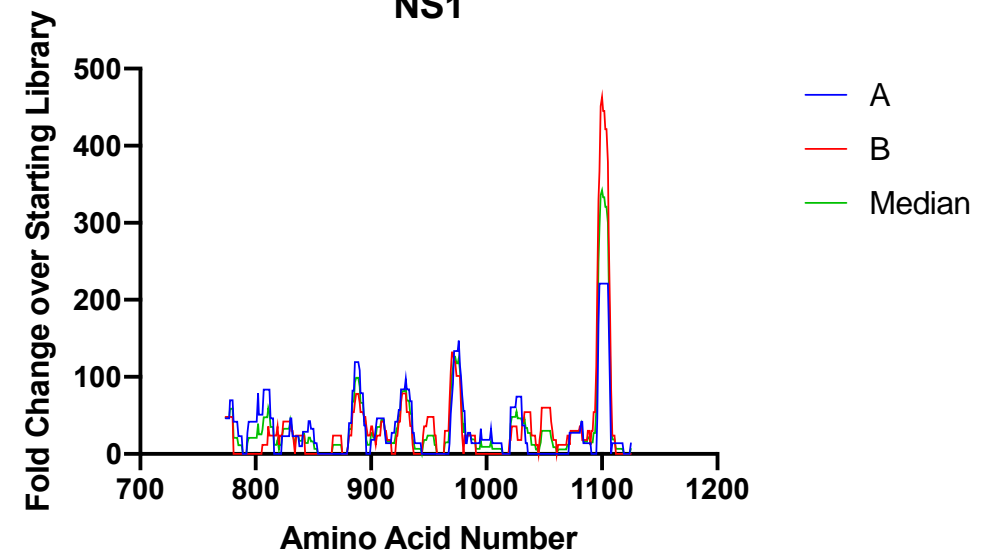

Full Alignment

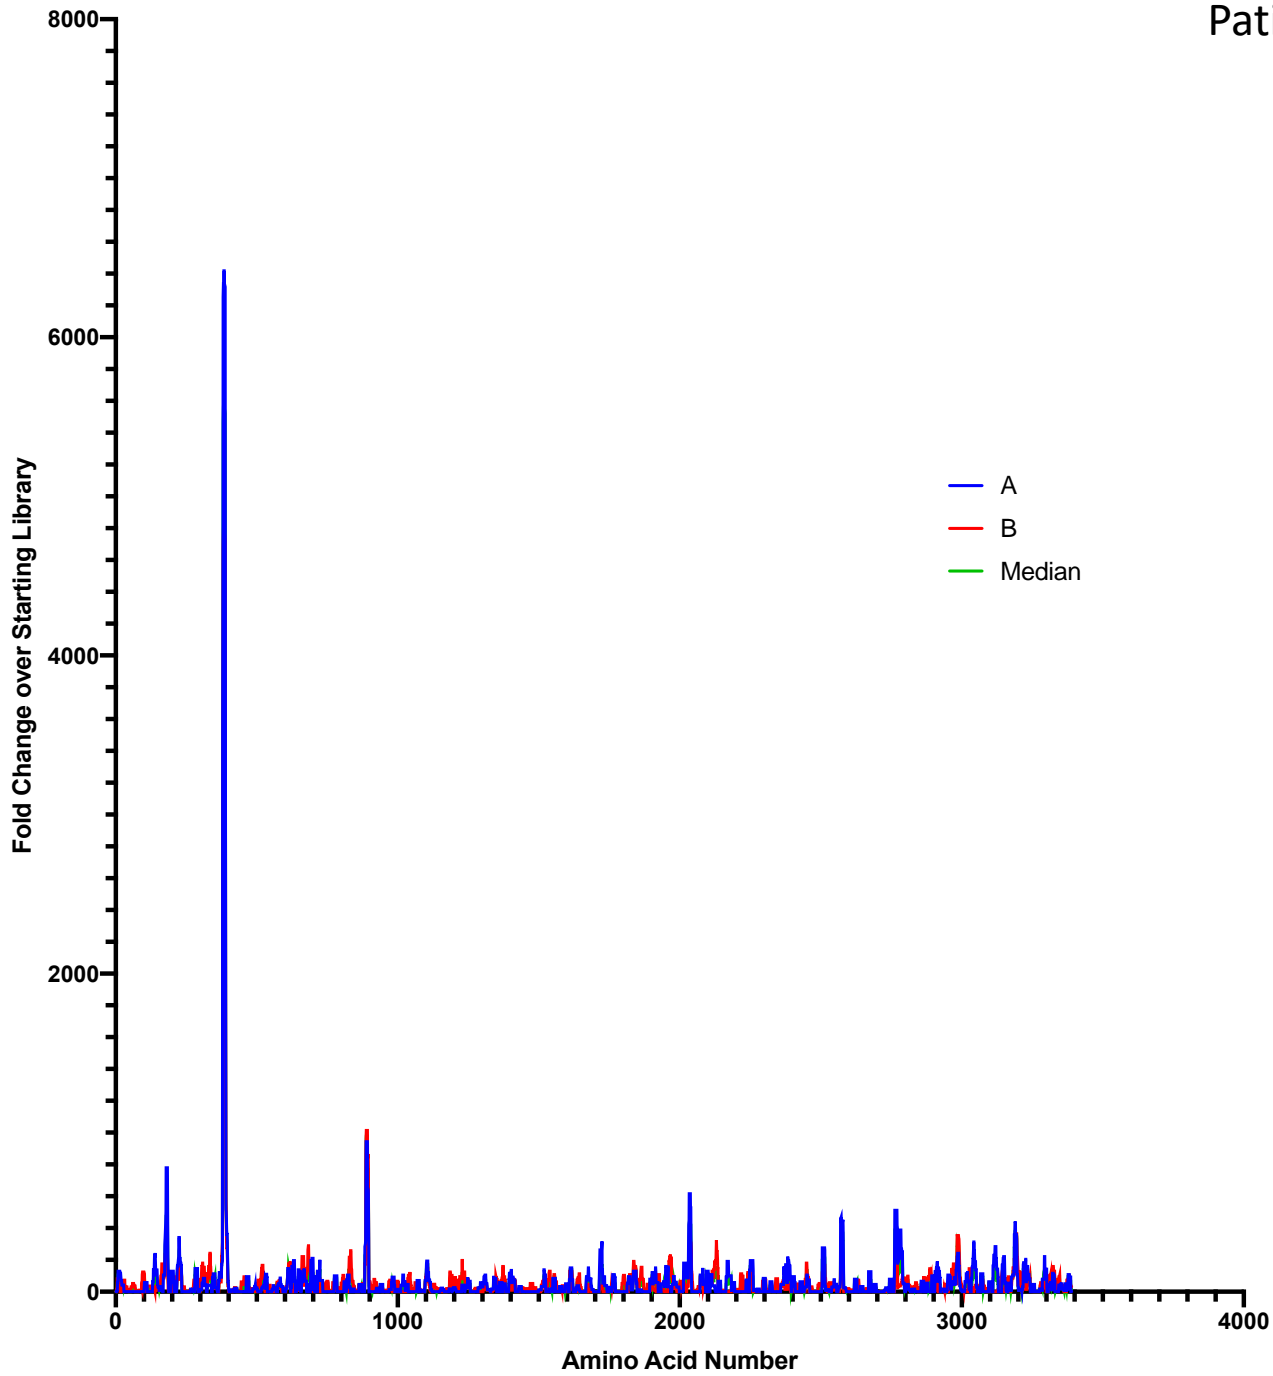

Patient 2

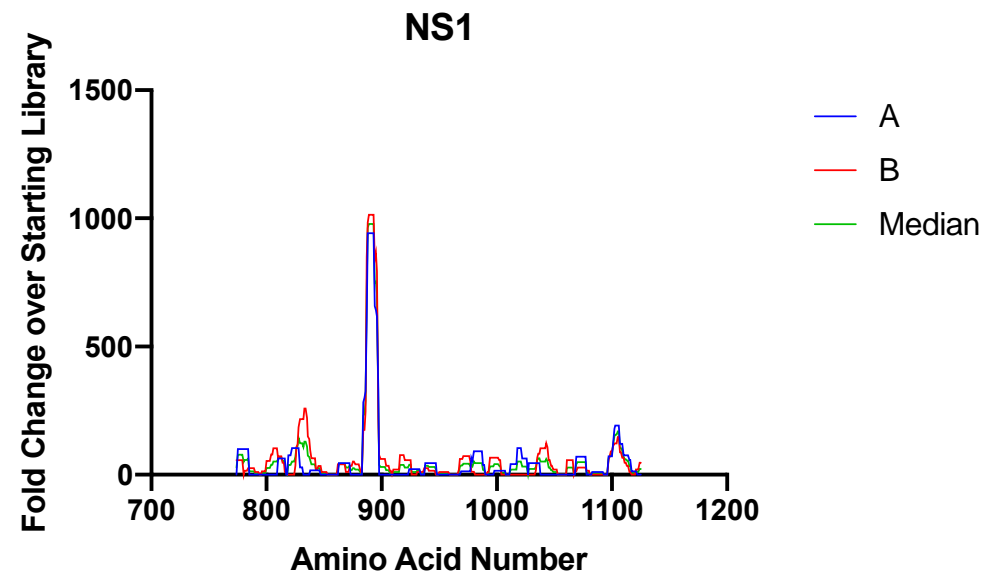

NS1

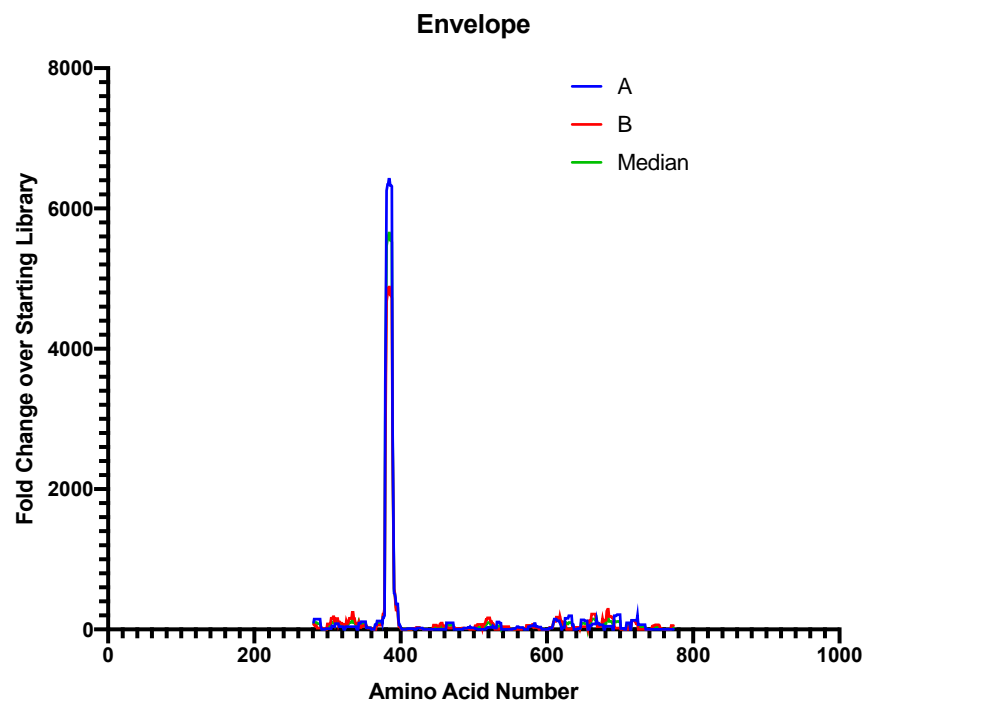

Envelope

Full Alignment

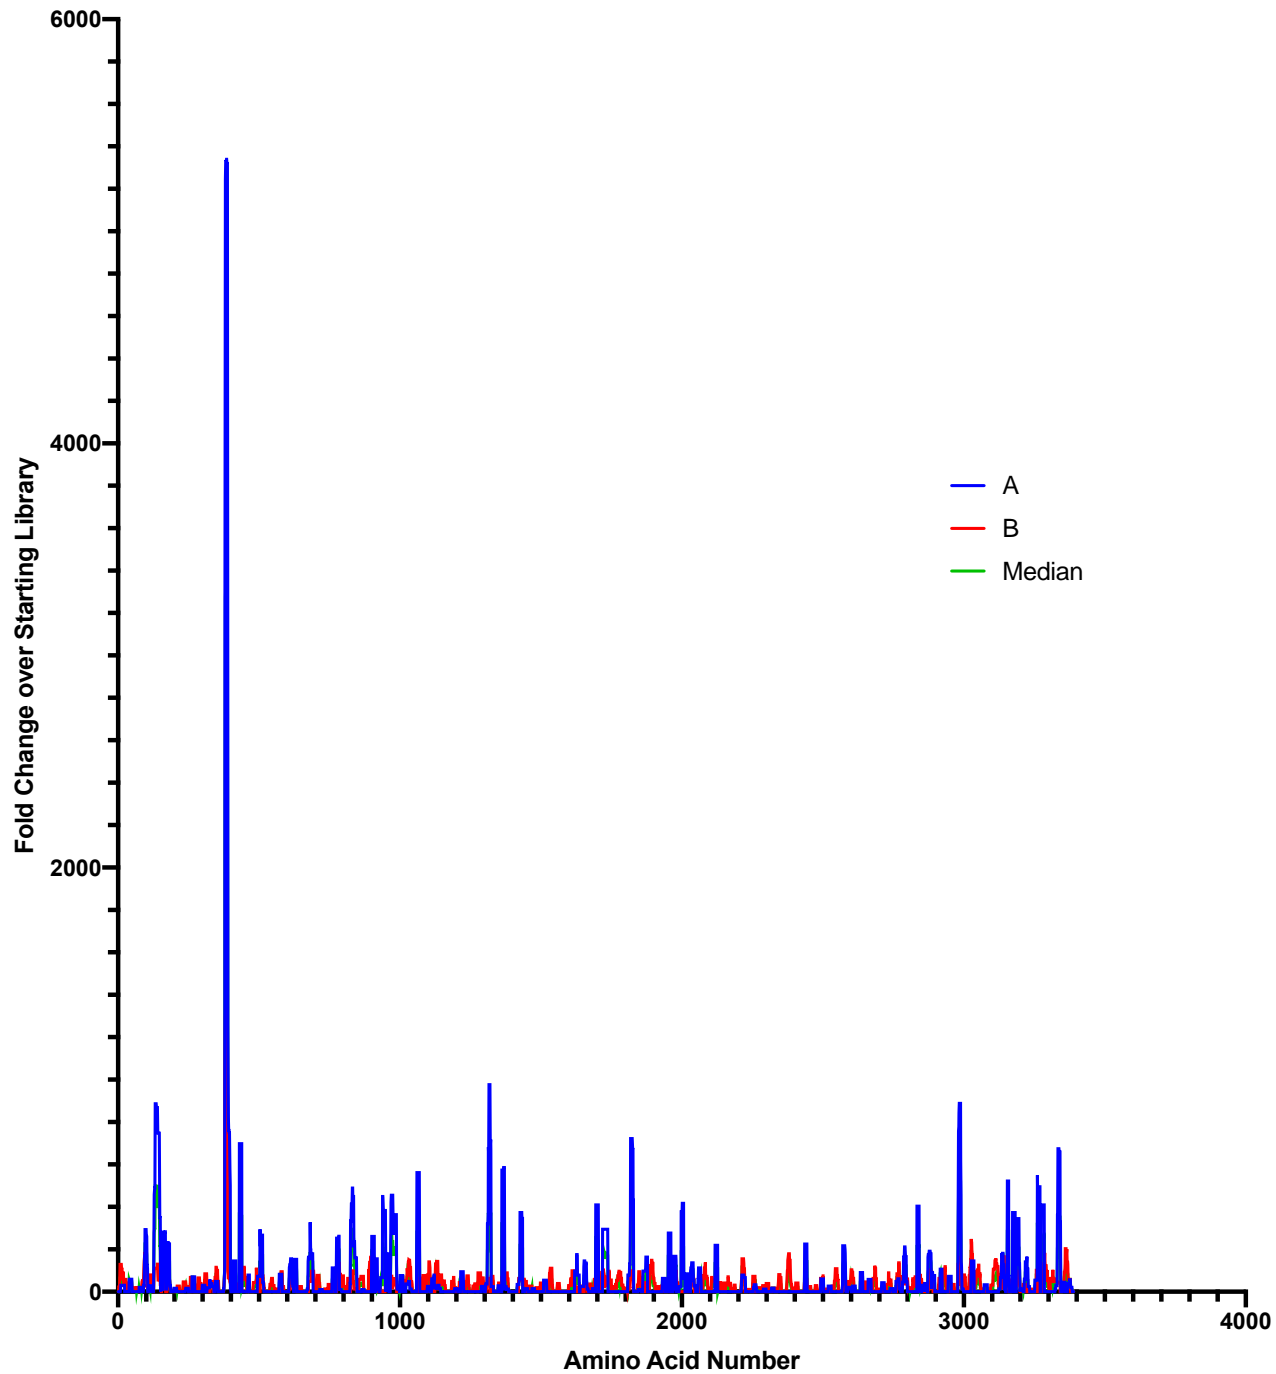

Patient 3

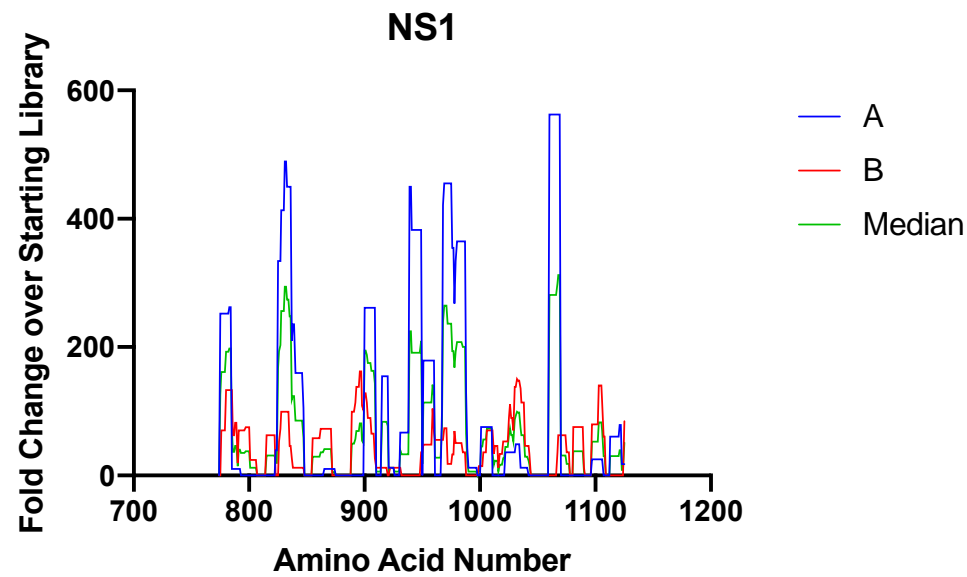

Envelope

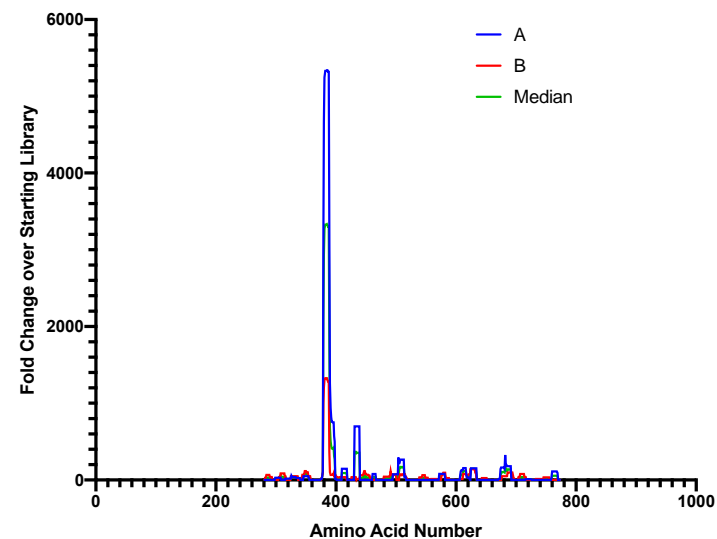

Full Alignment

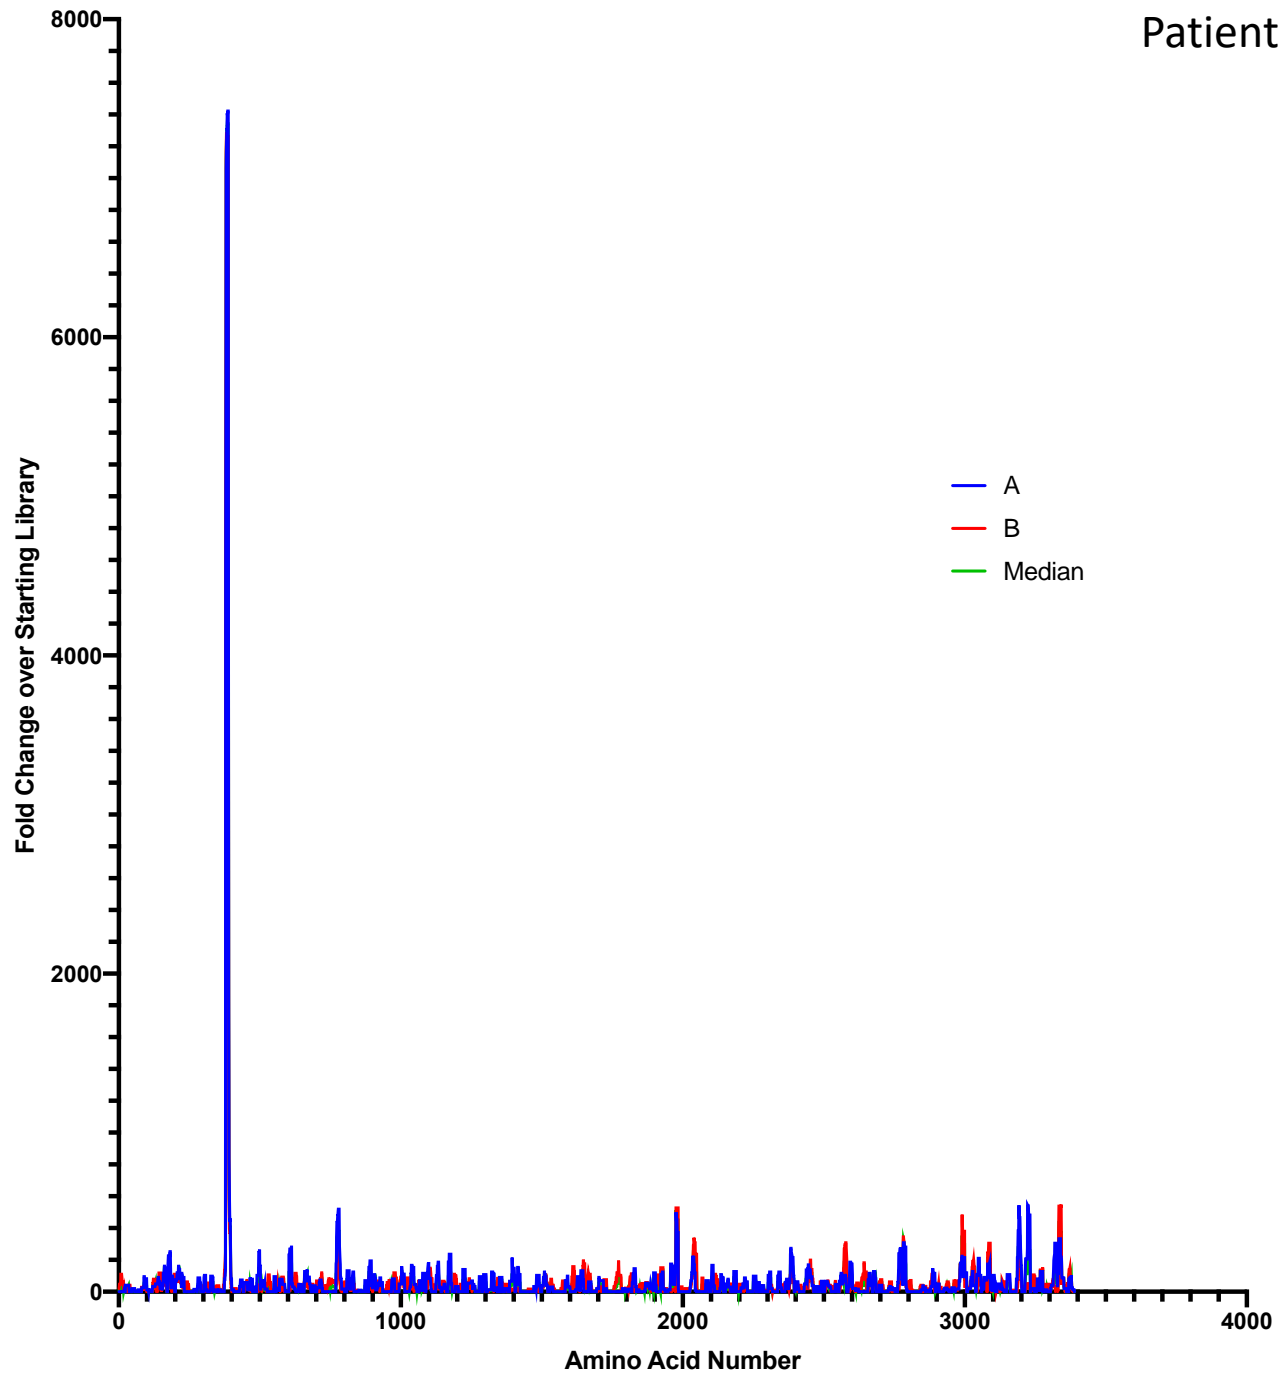

Patient 4

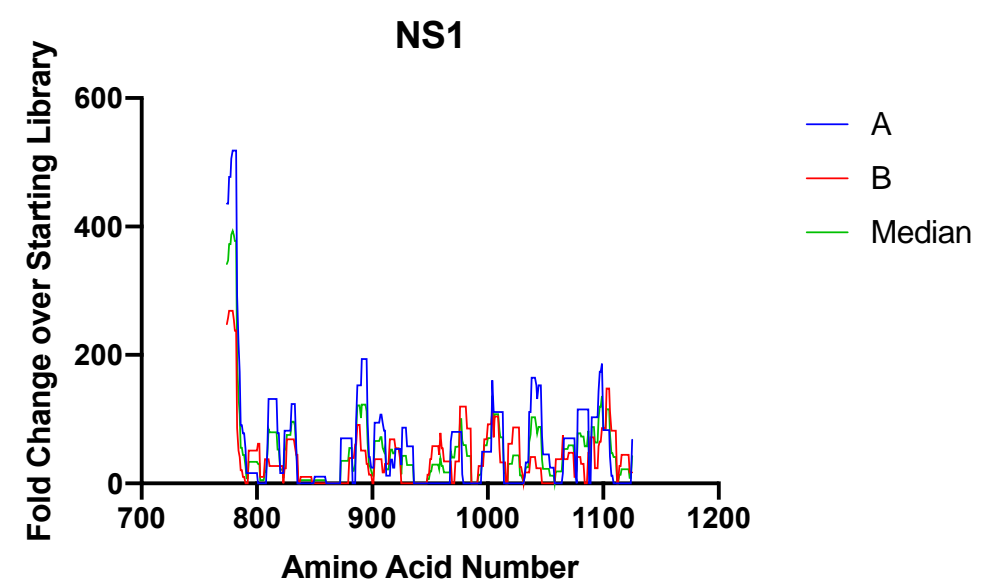

Envelope

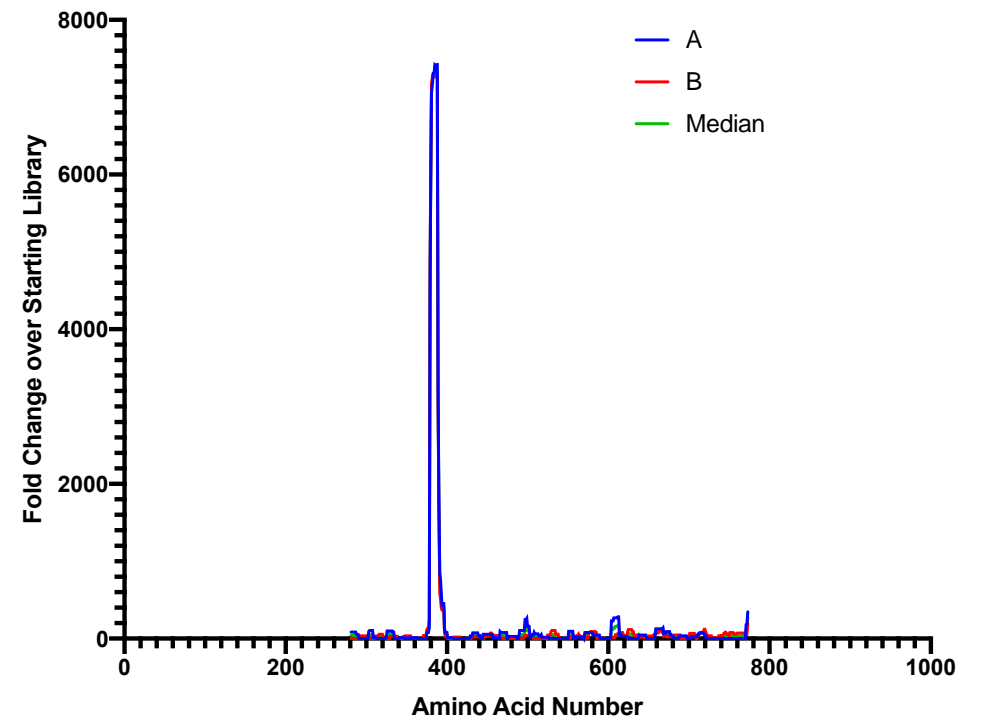

### Full Alignment

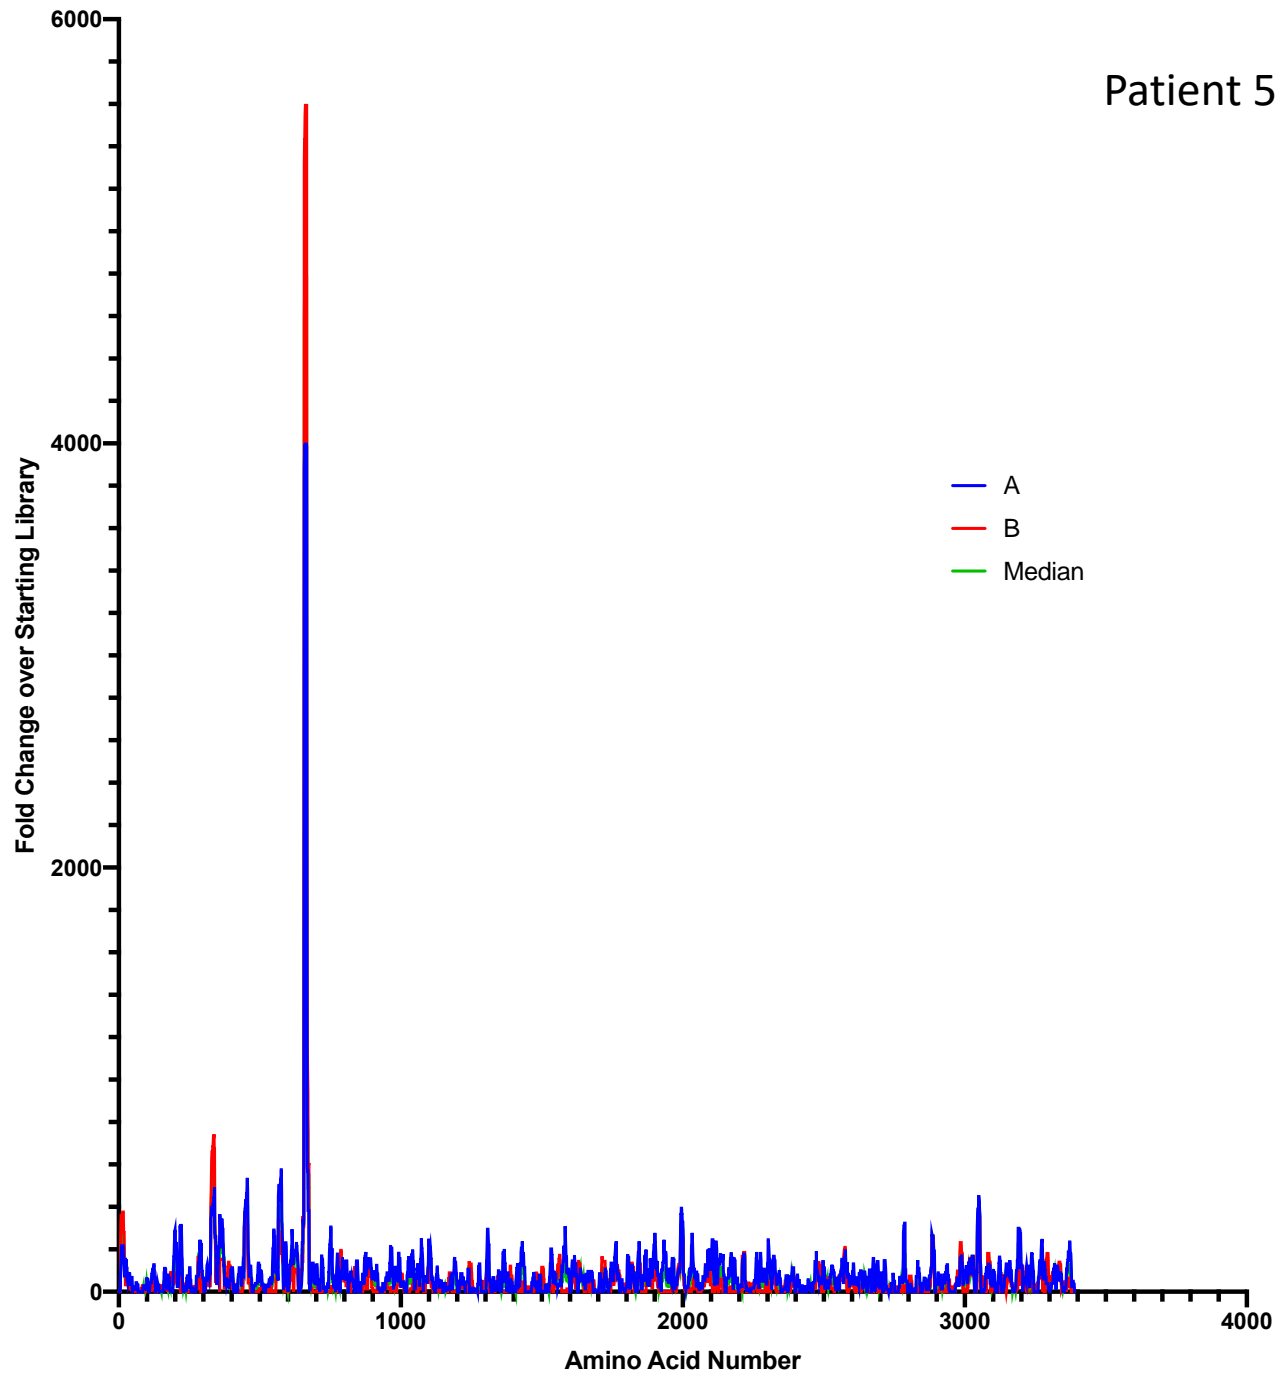

### NS1

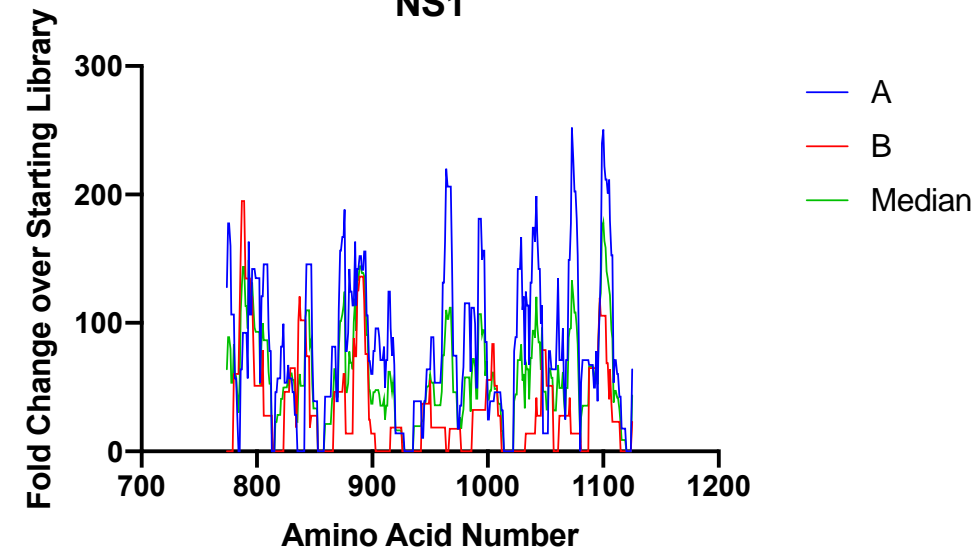

### Envelope

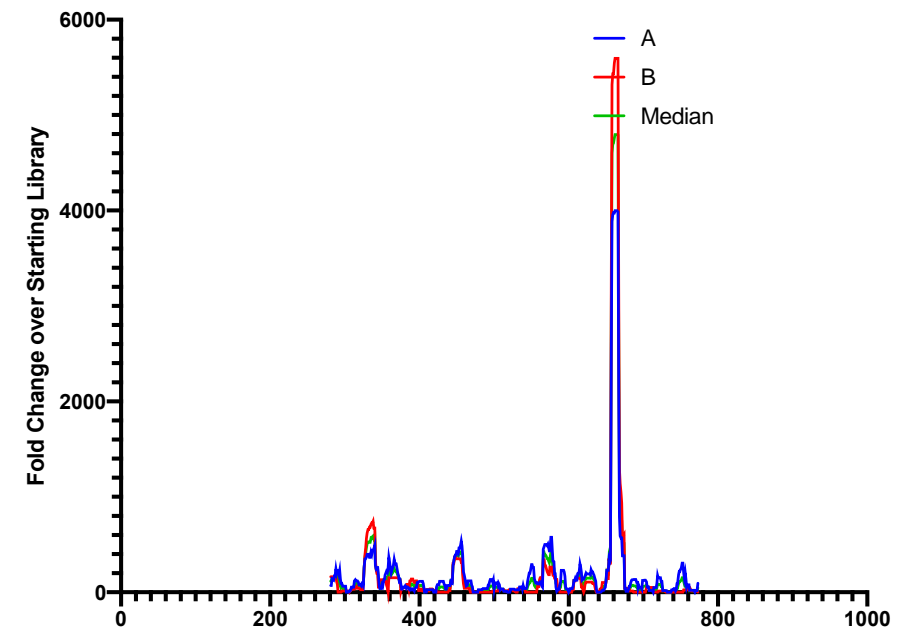

### Full Alignment

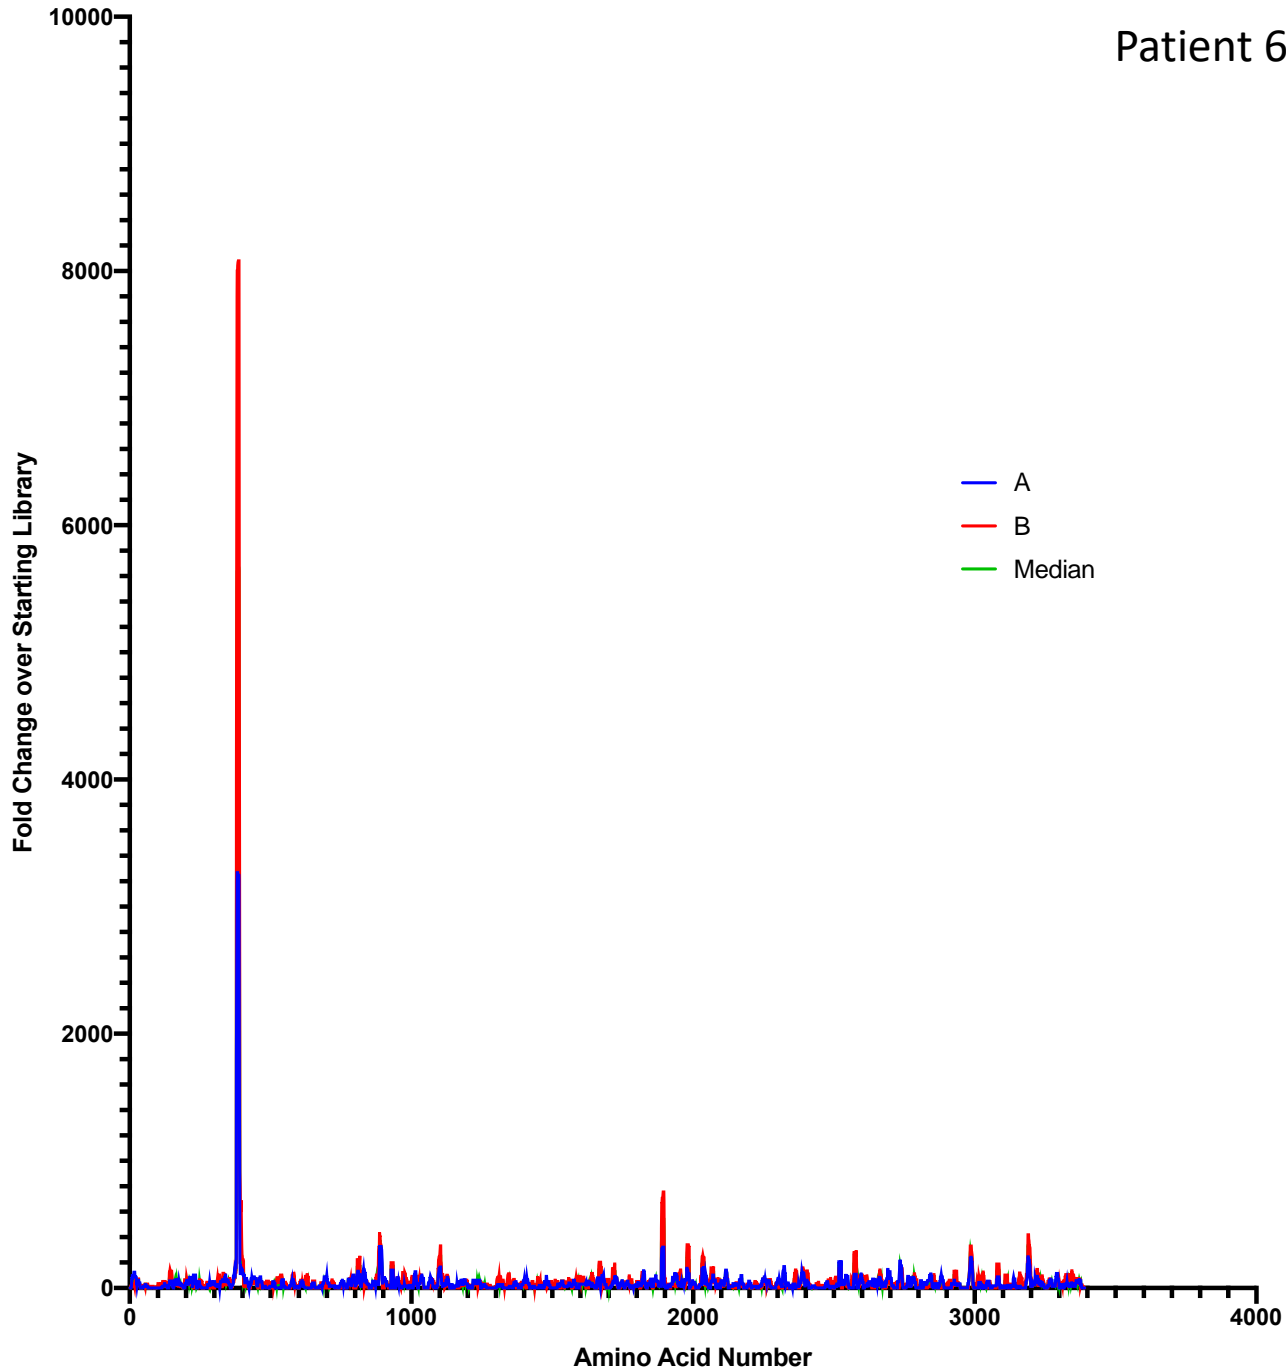

### Patient 6

- A
- B
- Median

### NS1

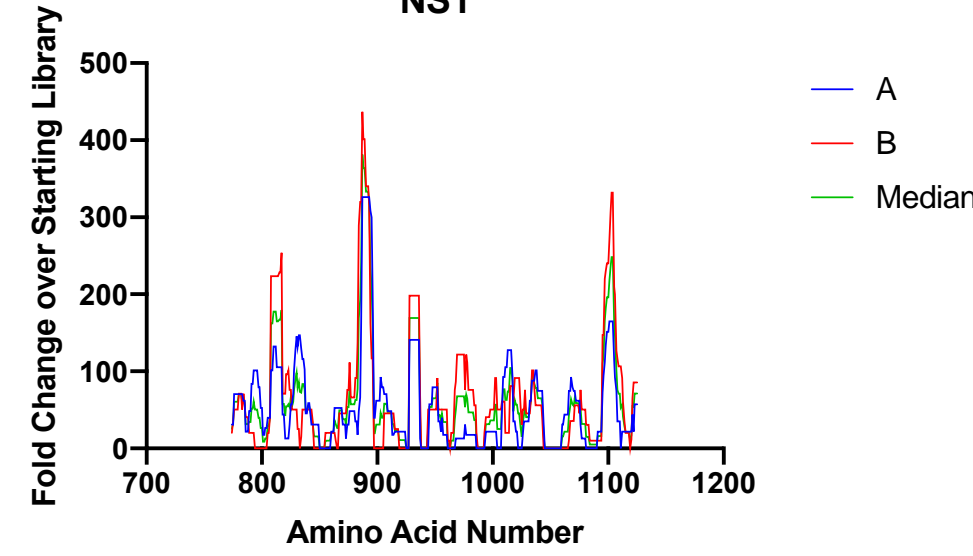

### Envelope

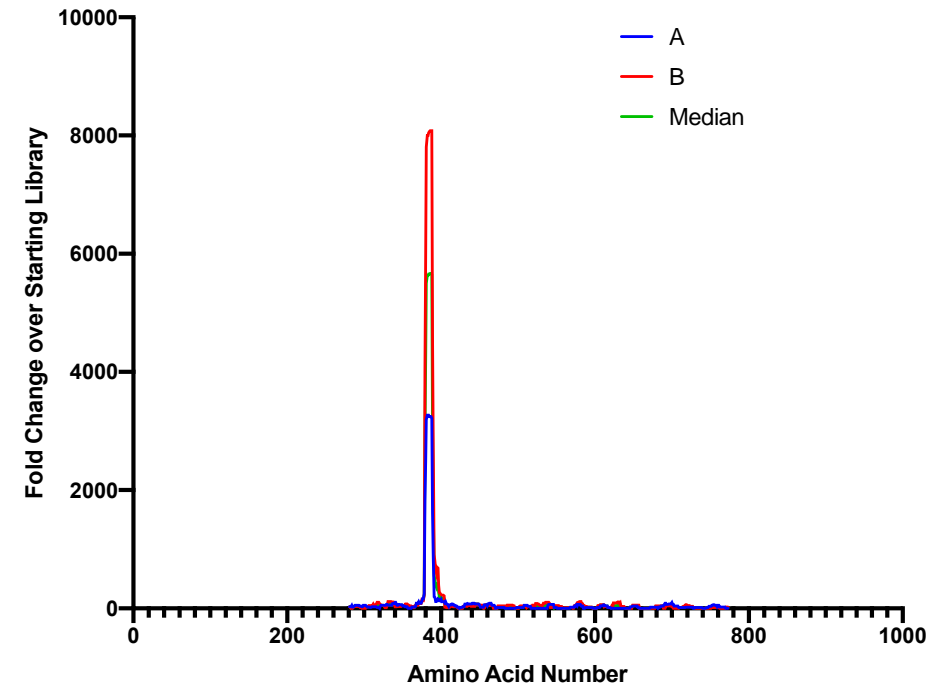

Full Alignment

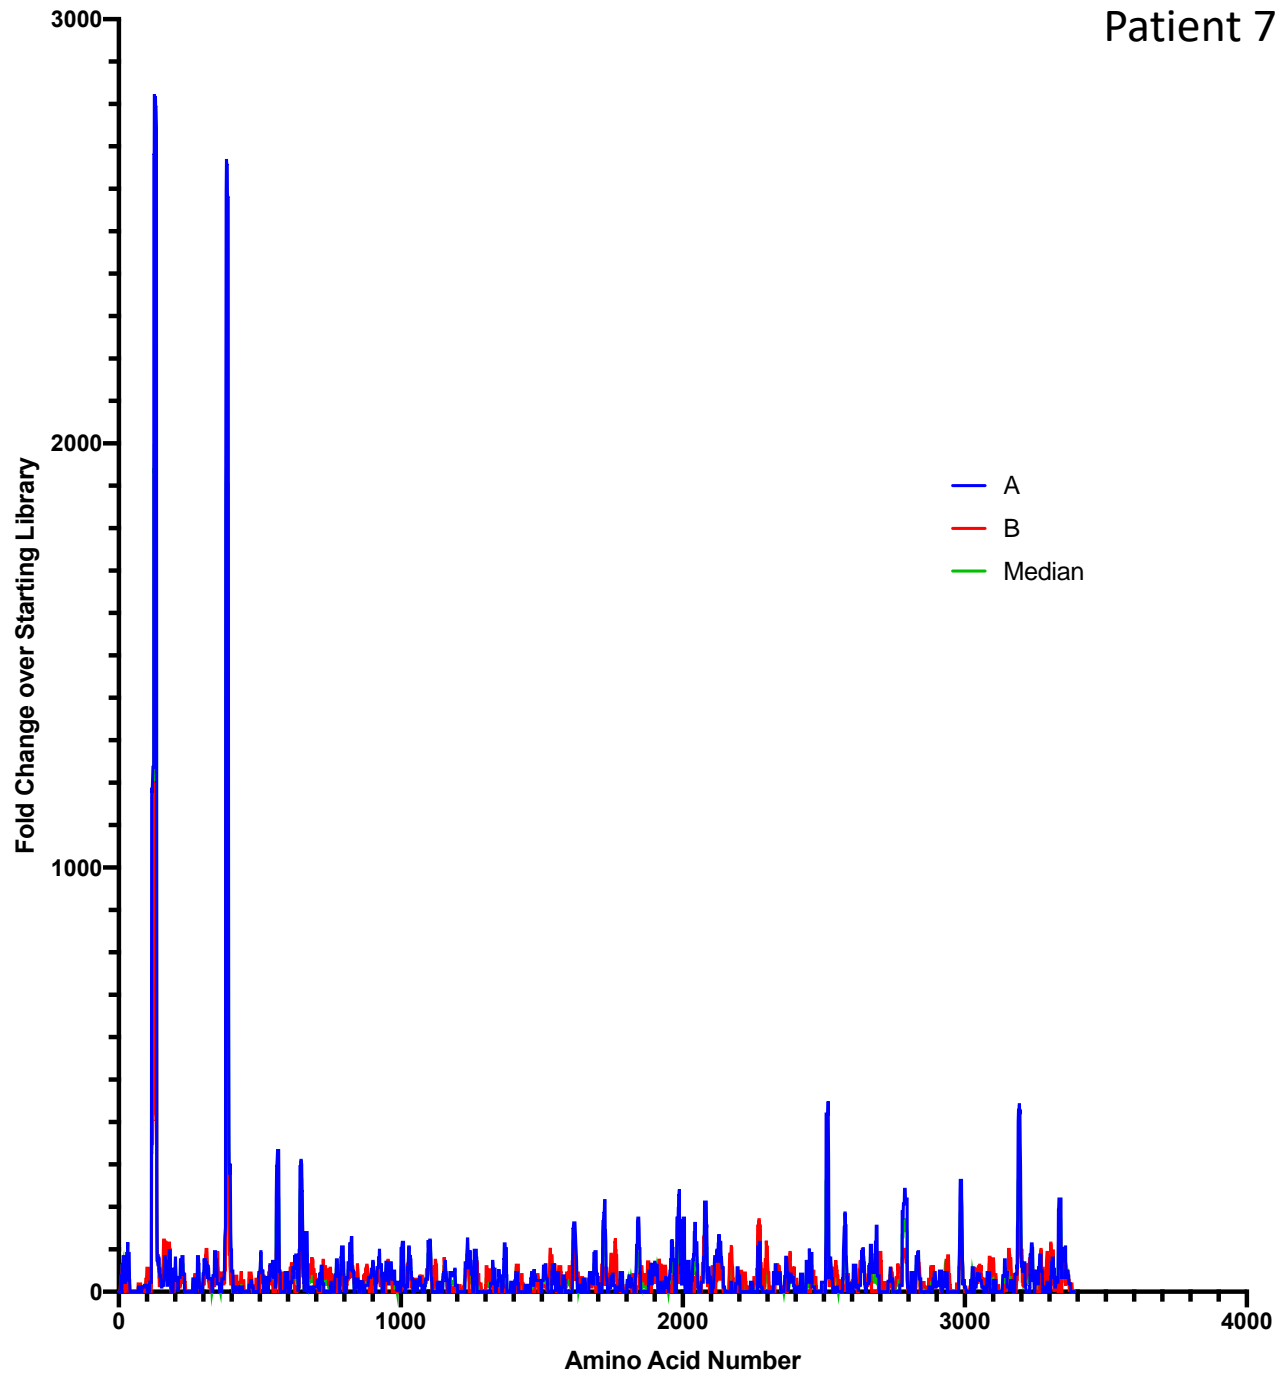

Patient 7

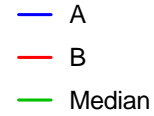

NS1

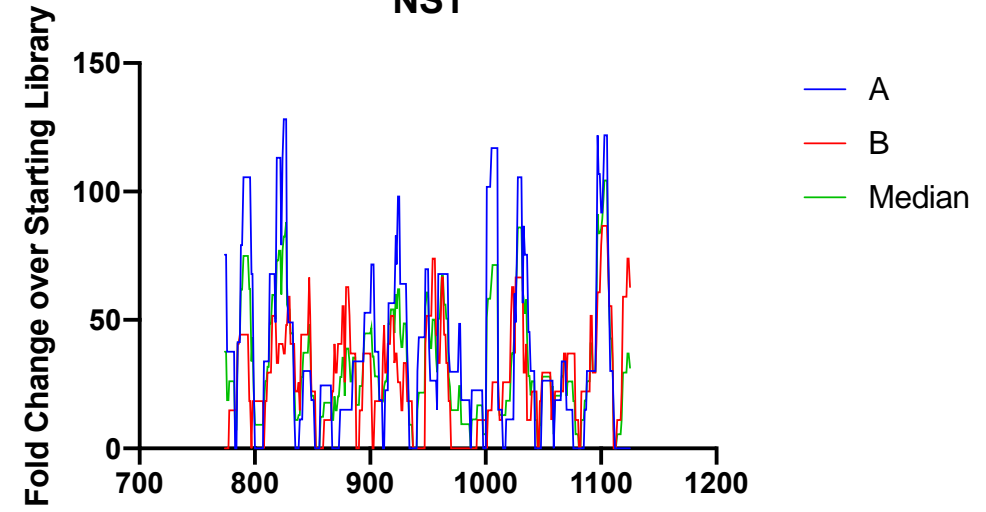

Envelope

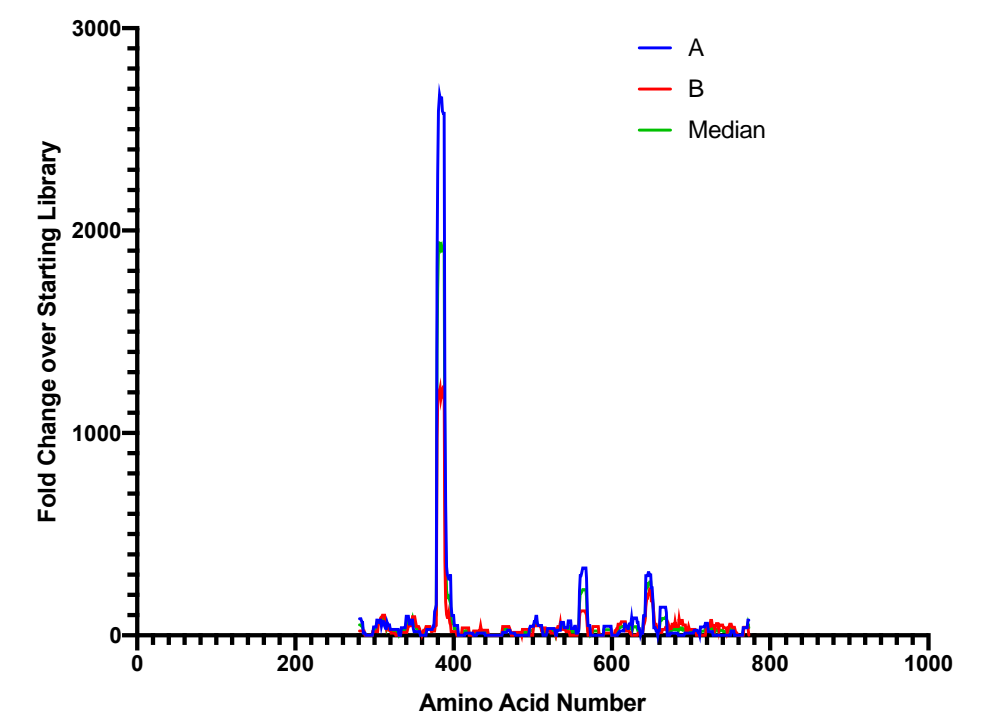

### Full Alignment

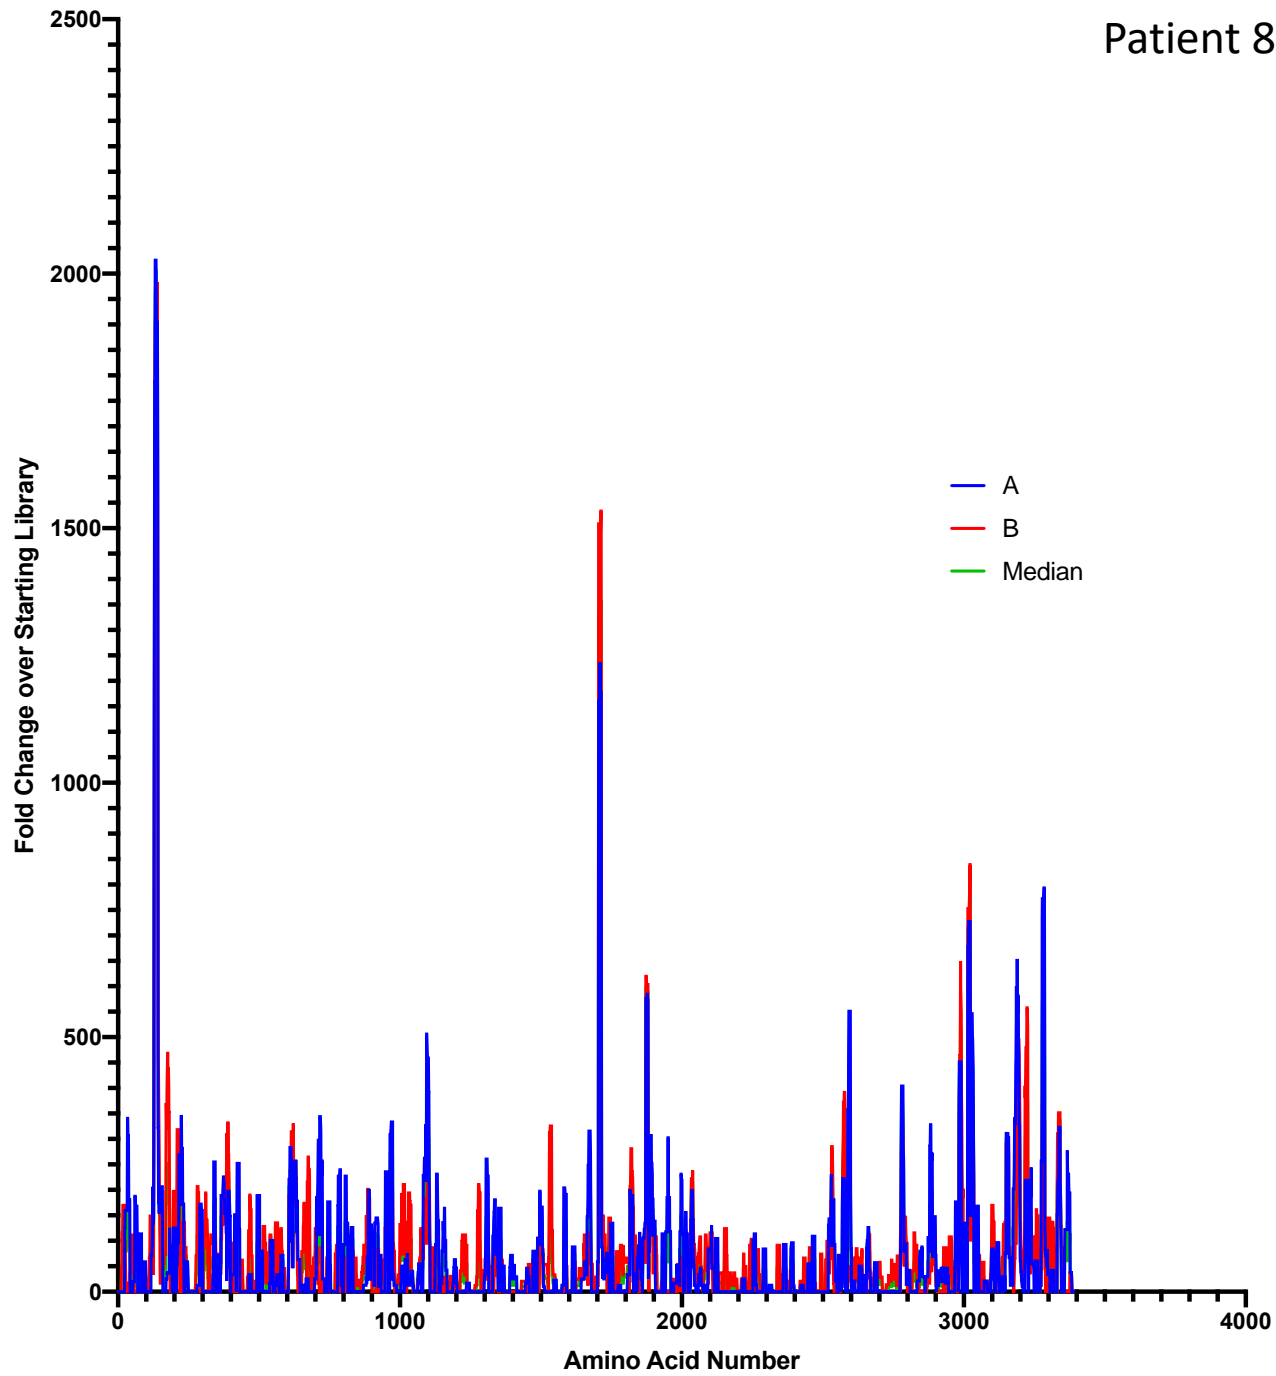

### Patient 8

### NS1

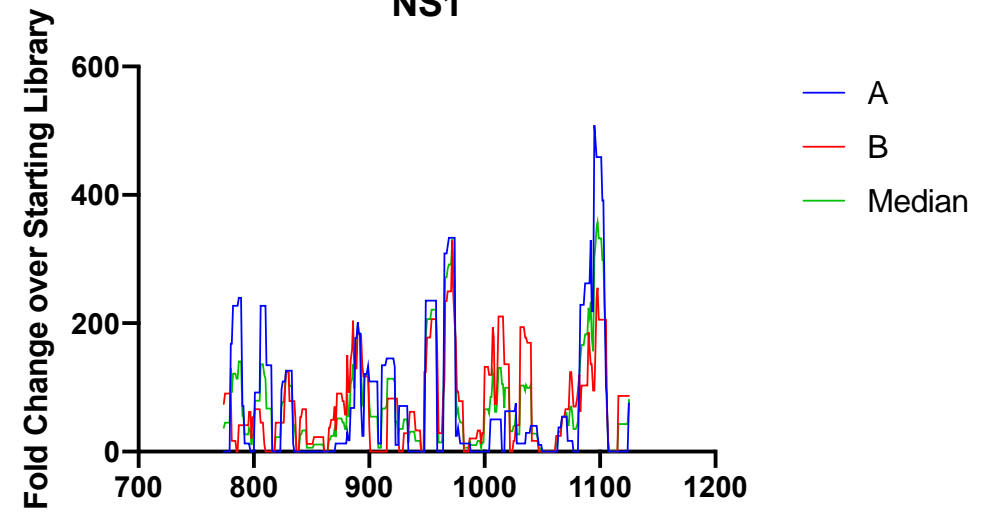

### Envelope

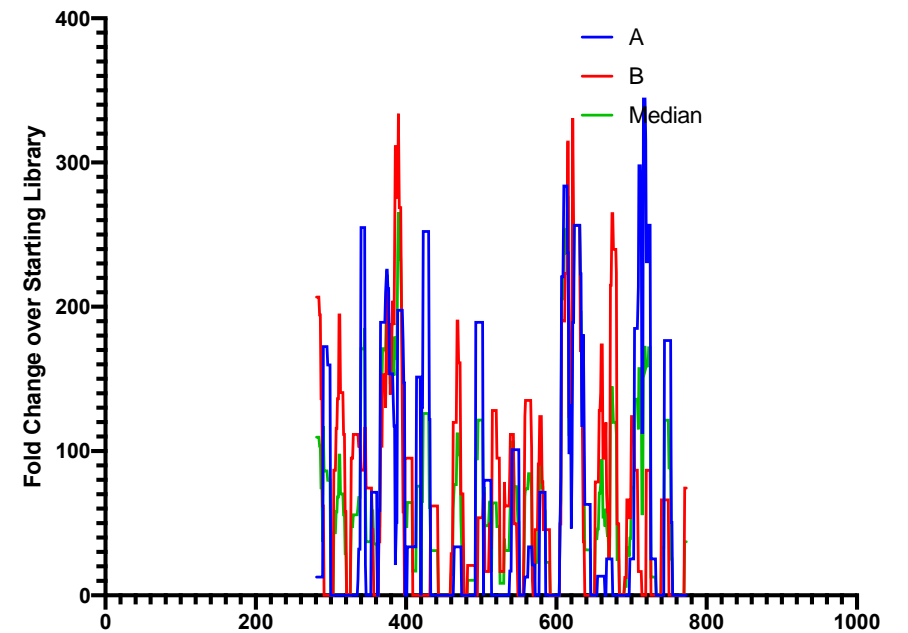



### Full Alignment

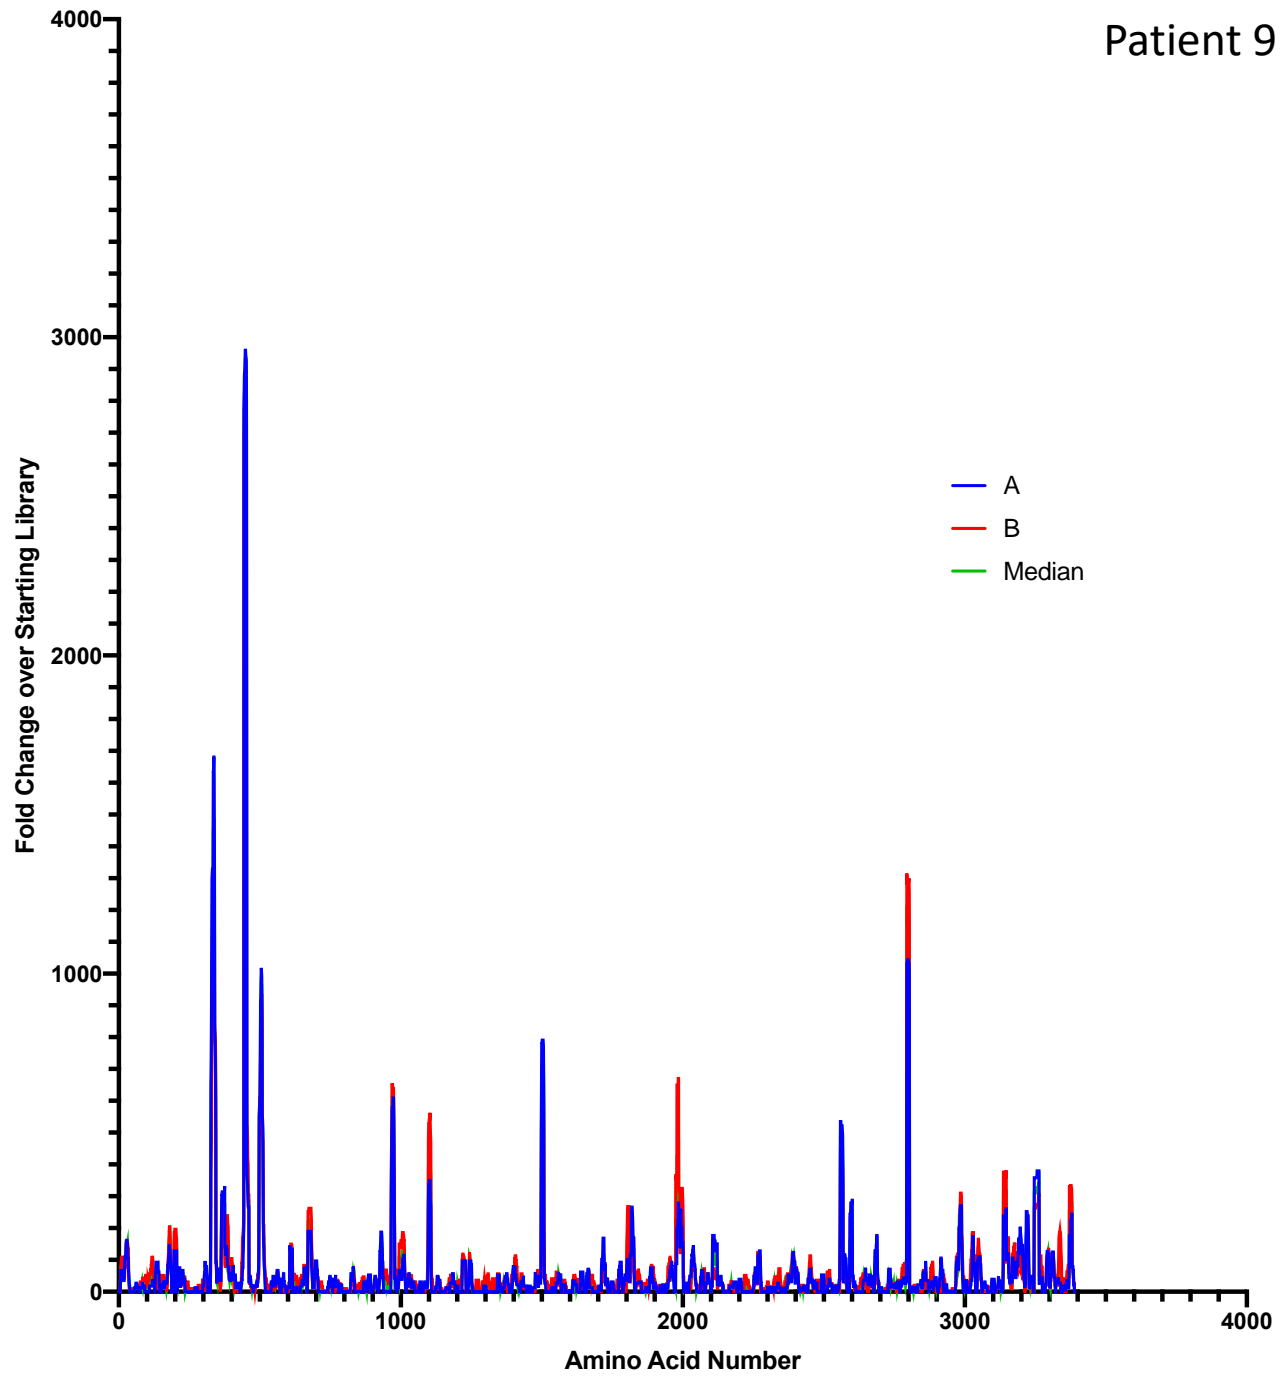

### Patient 9

### NS1

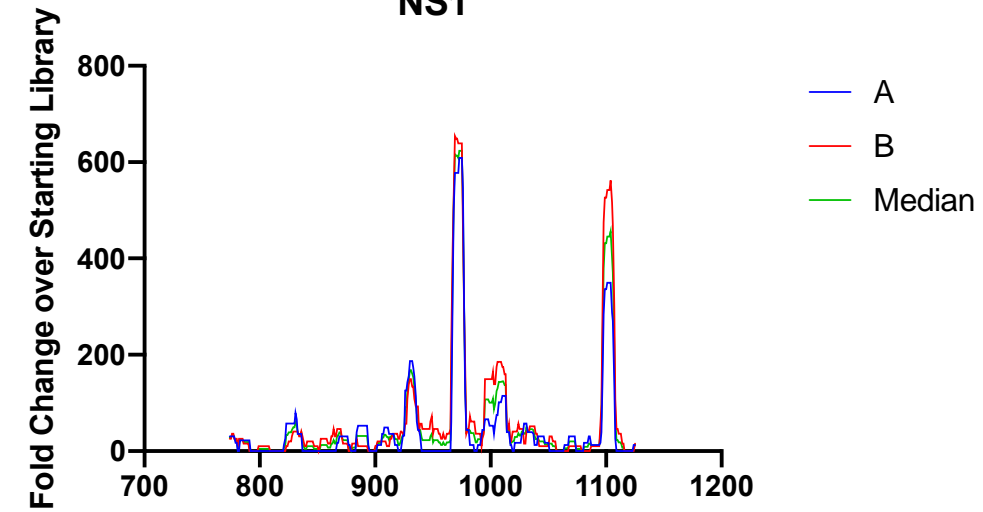

### Envelope

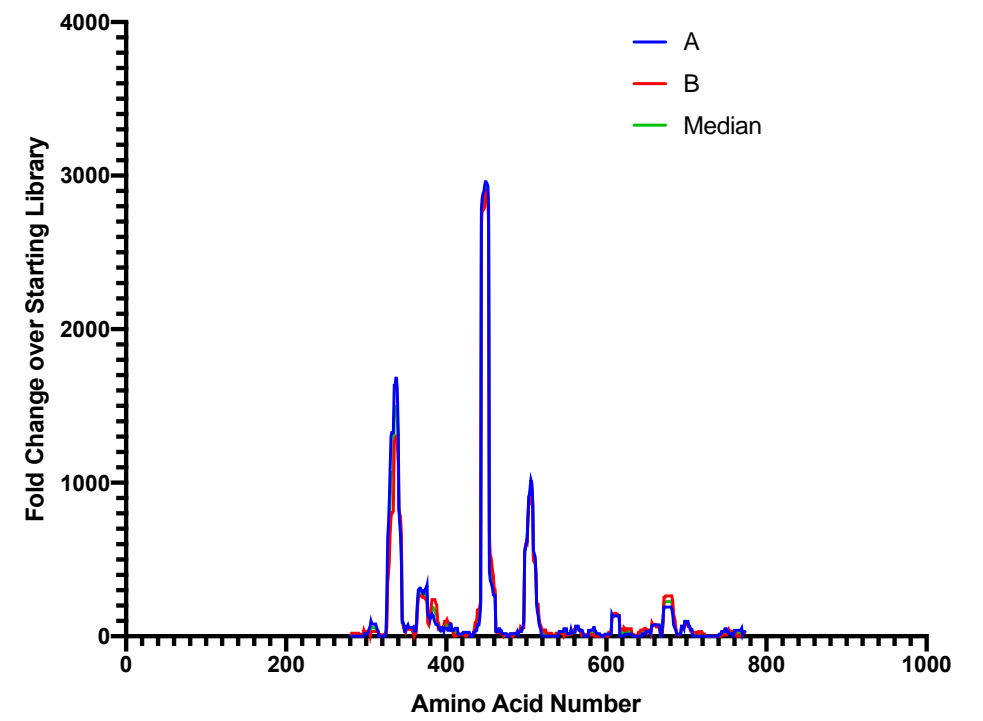

Full Alignment

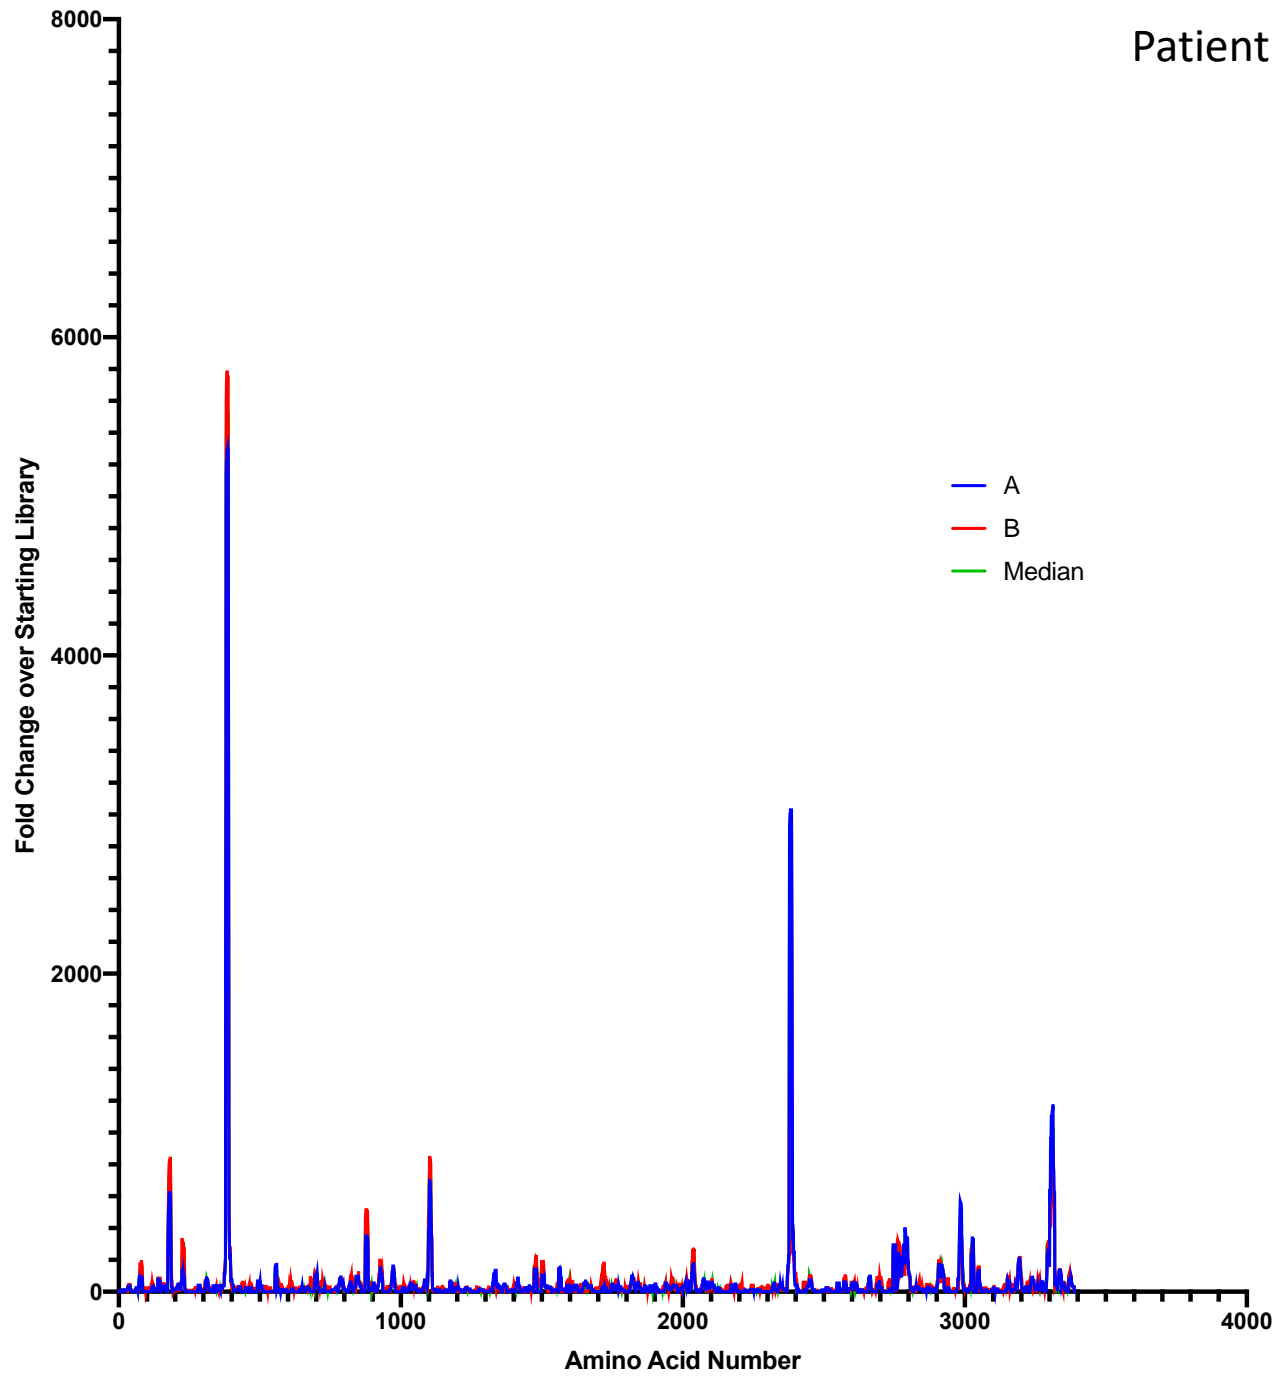

Patient 10

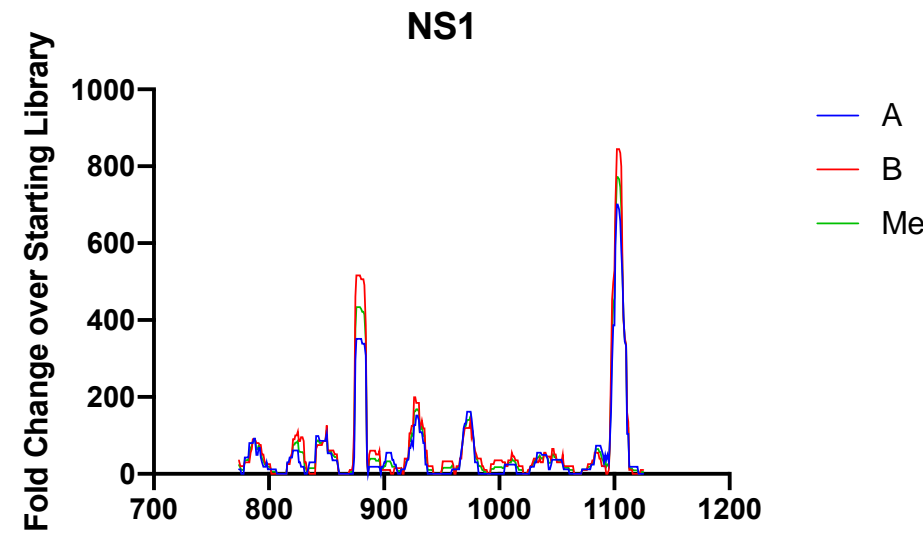

NS1

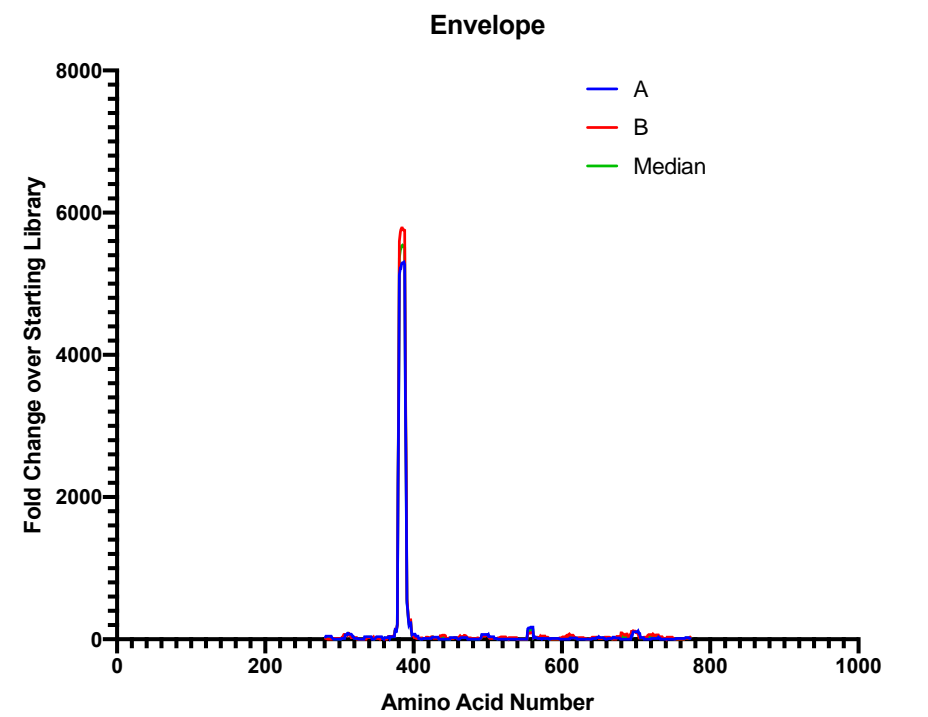

Envelope

### Full Alignment

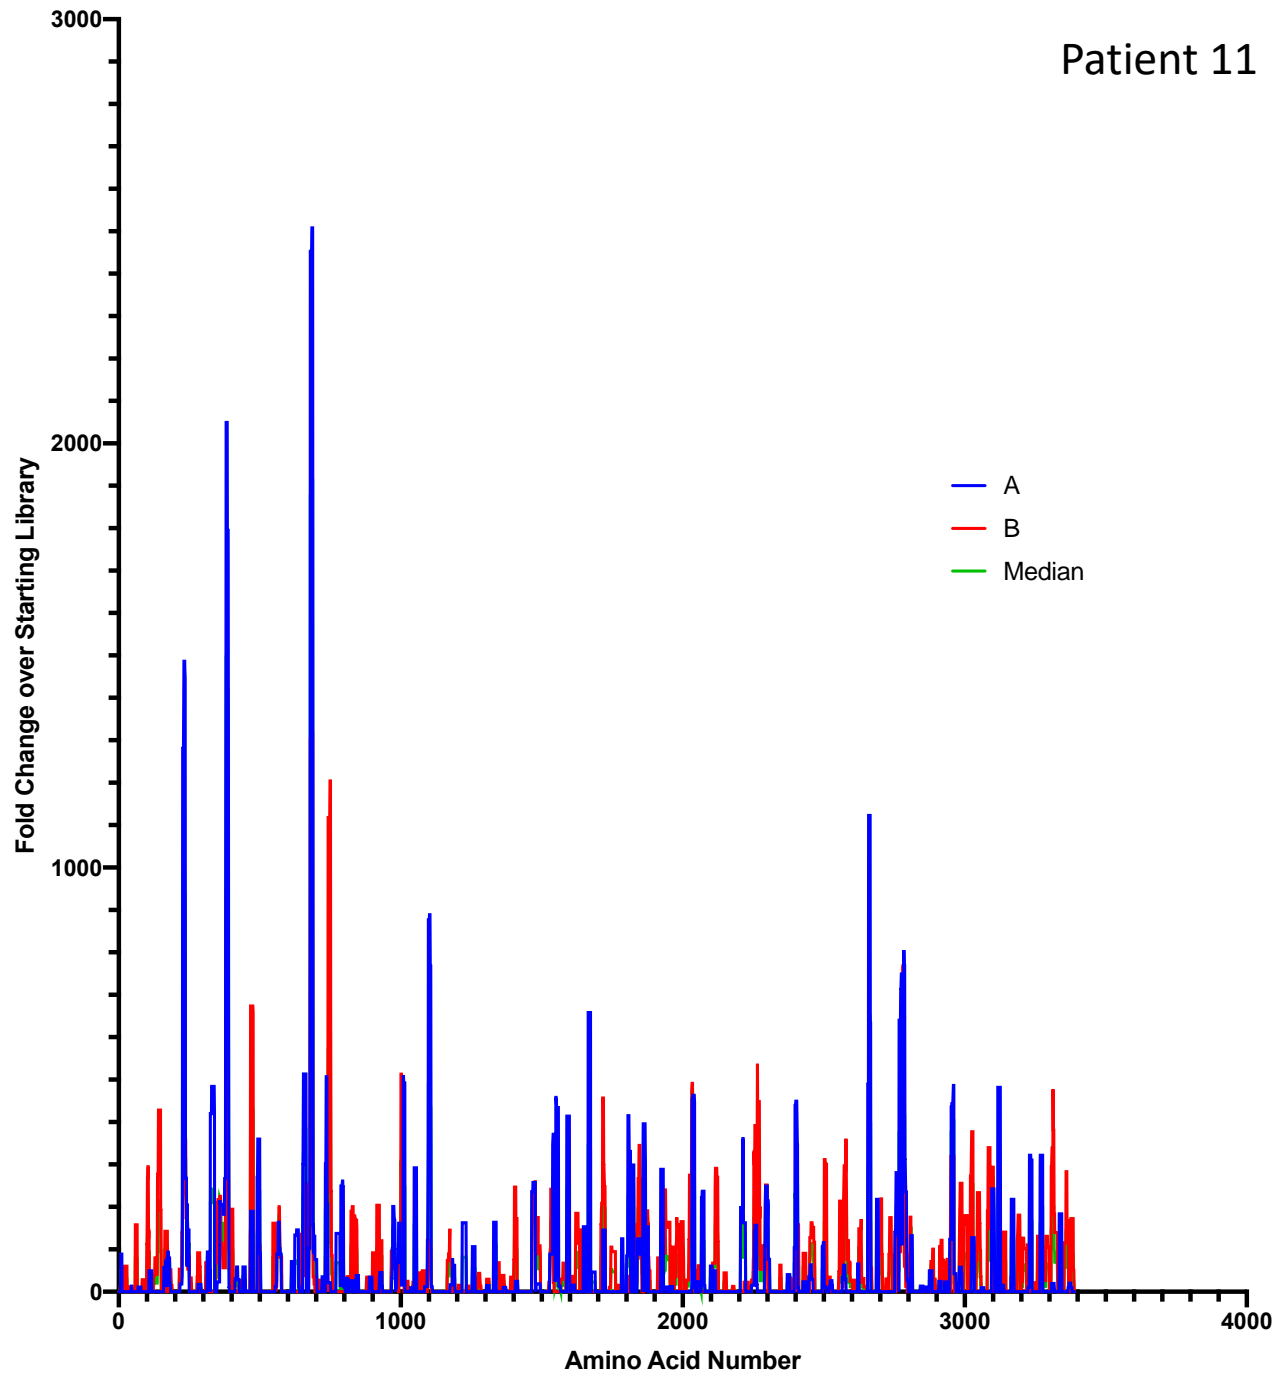

### NS1

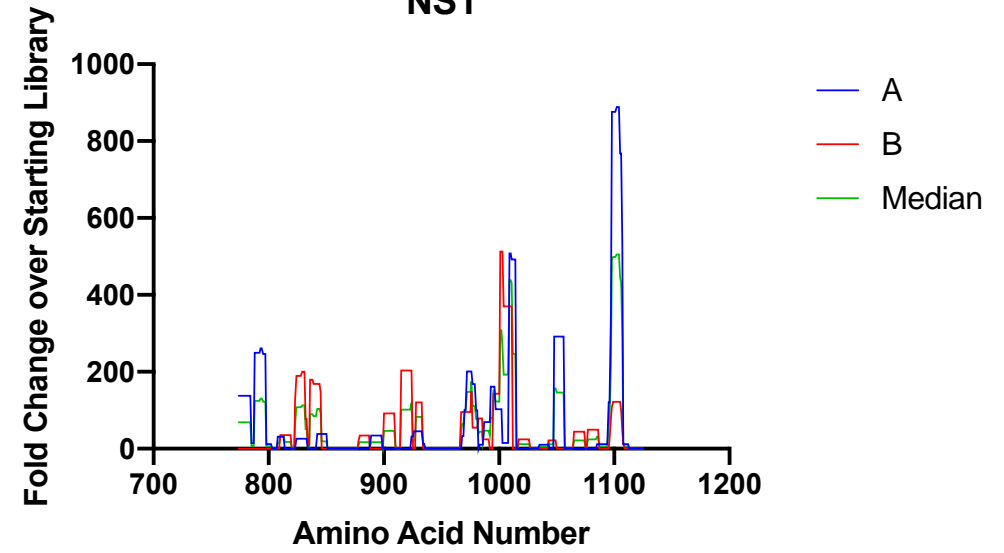

### Envelope

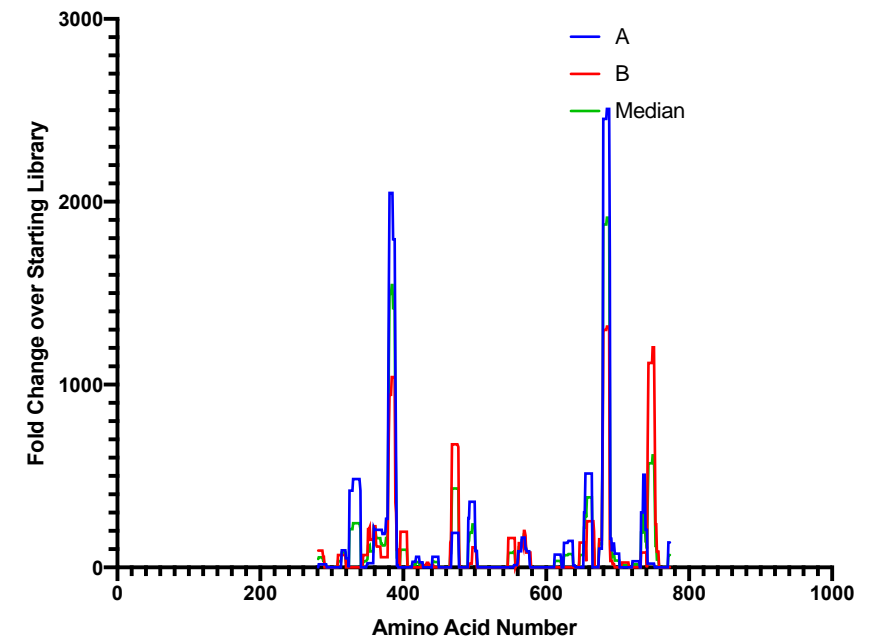

### Full Alignment

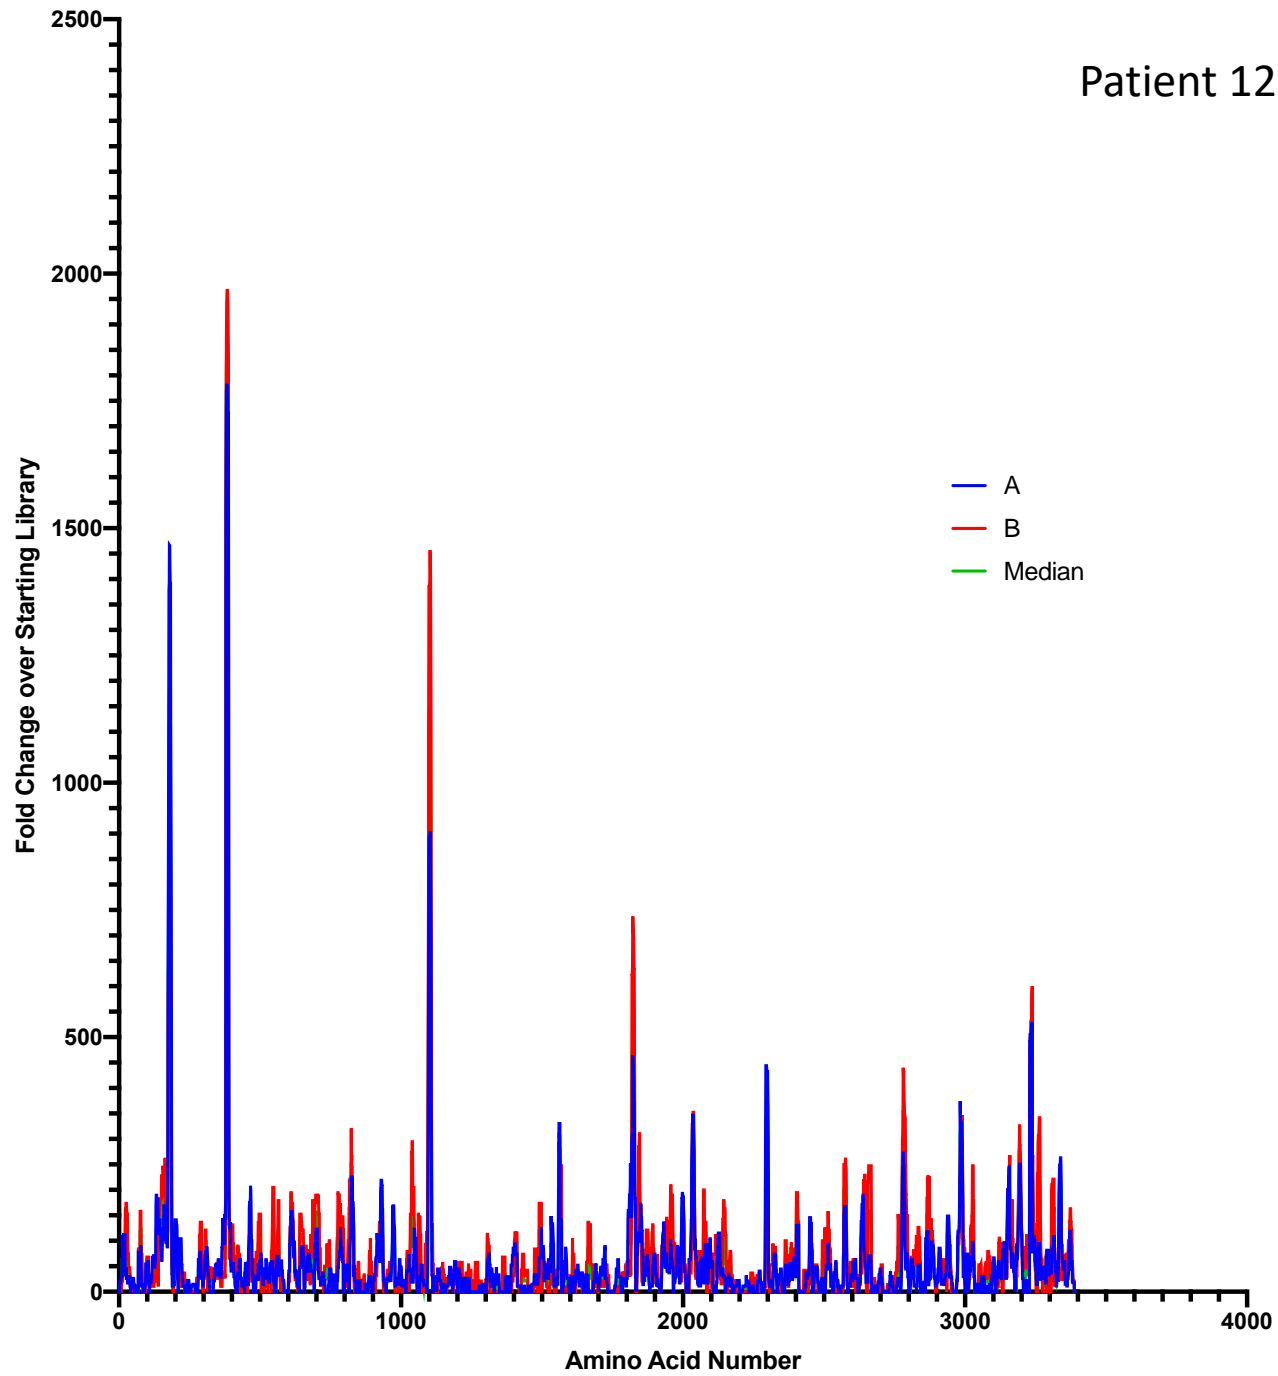

### NS1

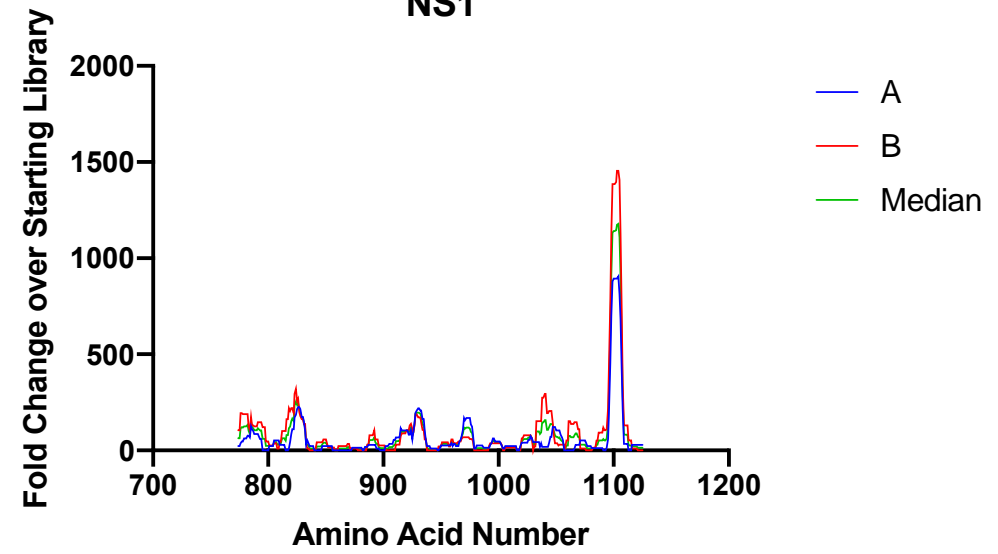

### Envelope

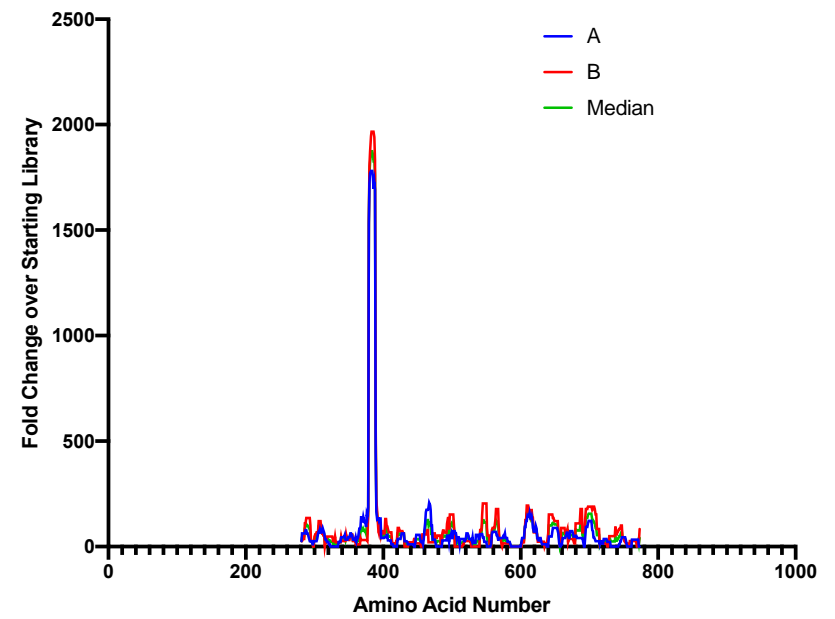

### Full Alignment

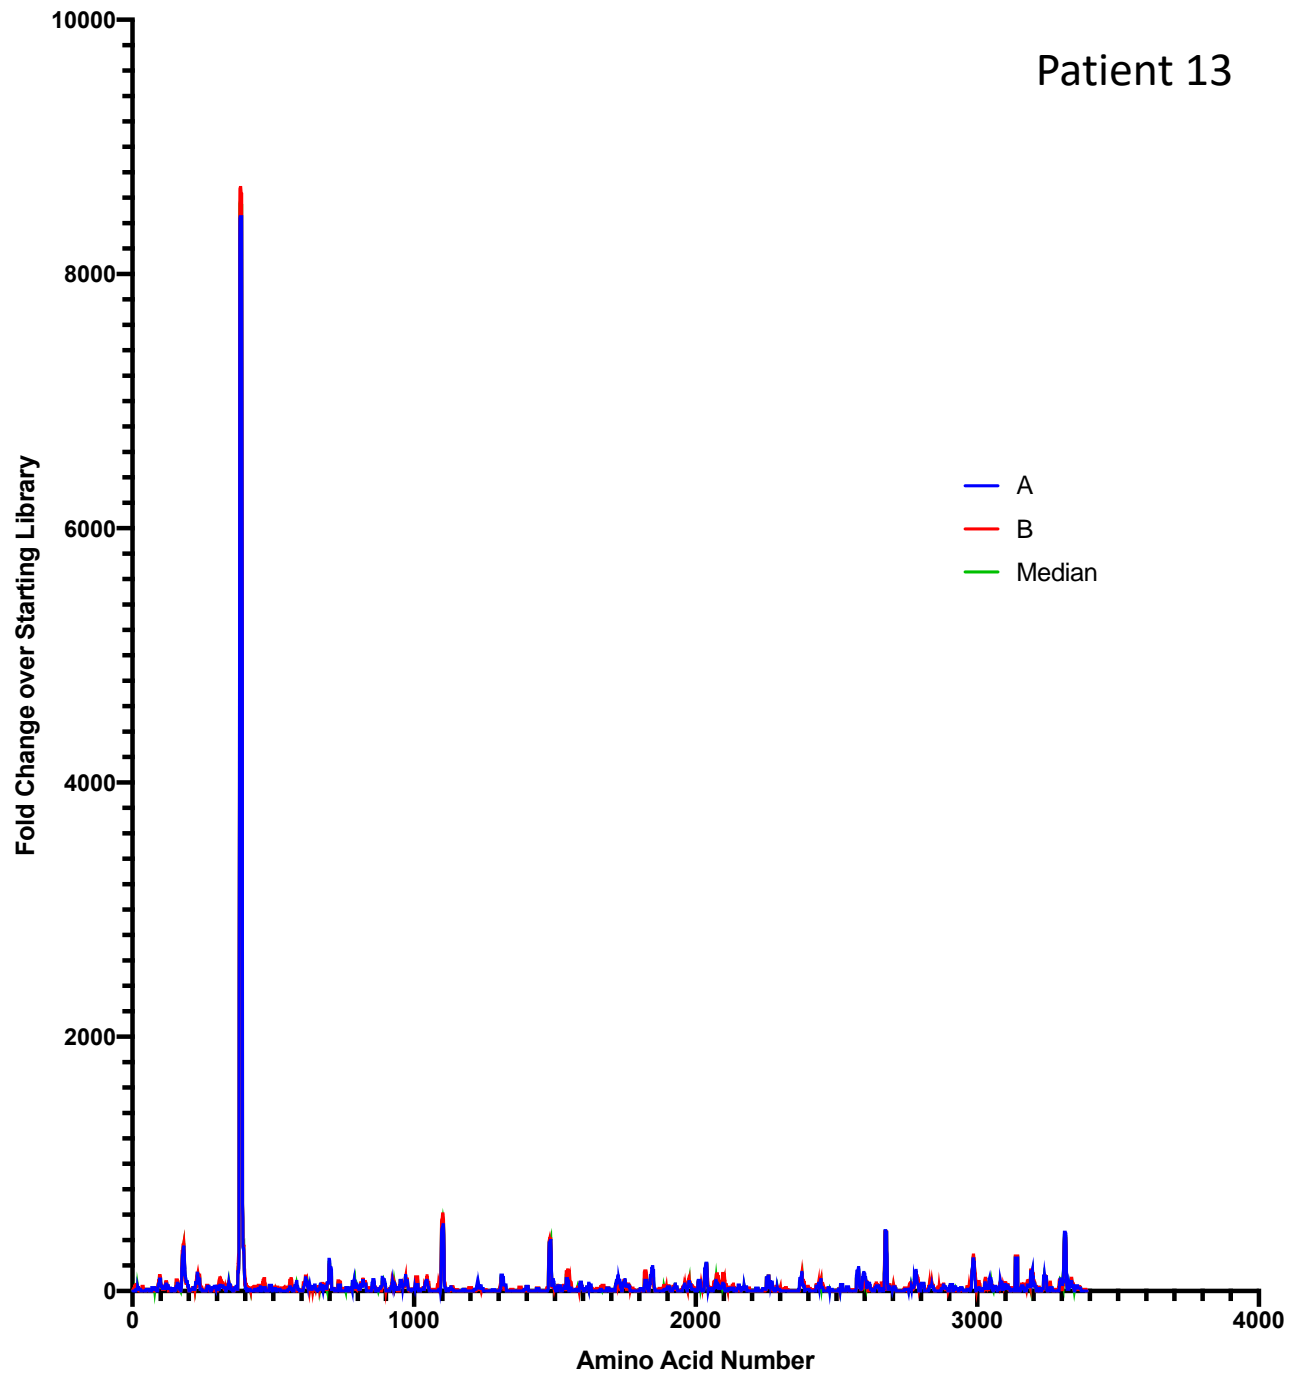

### NS1

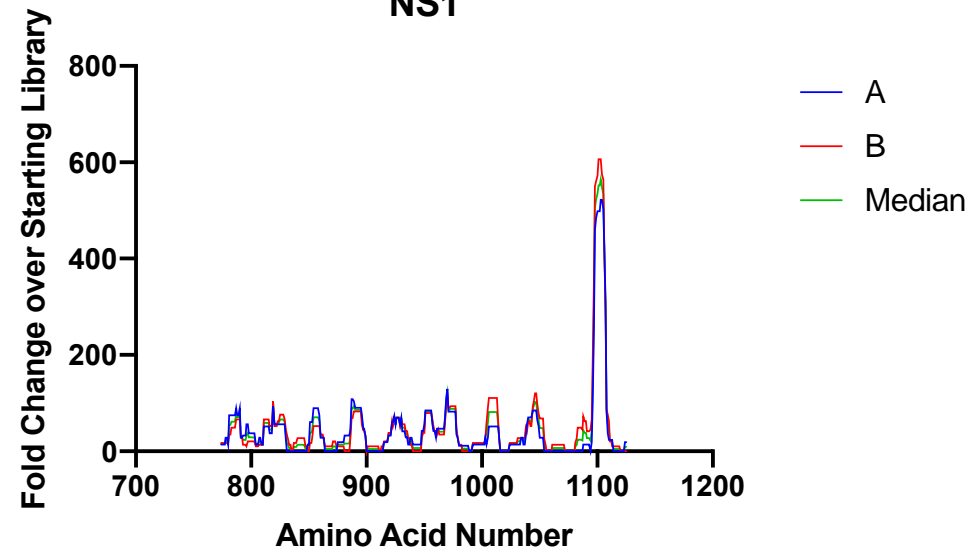

### Envelope

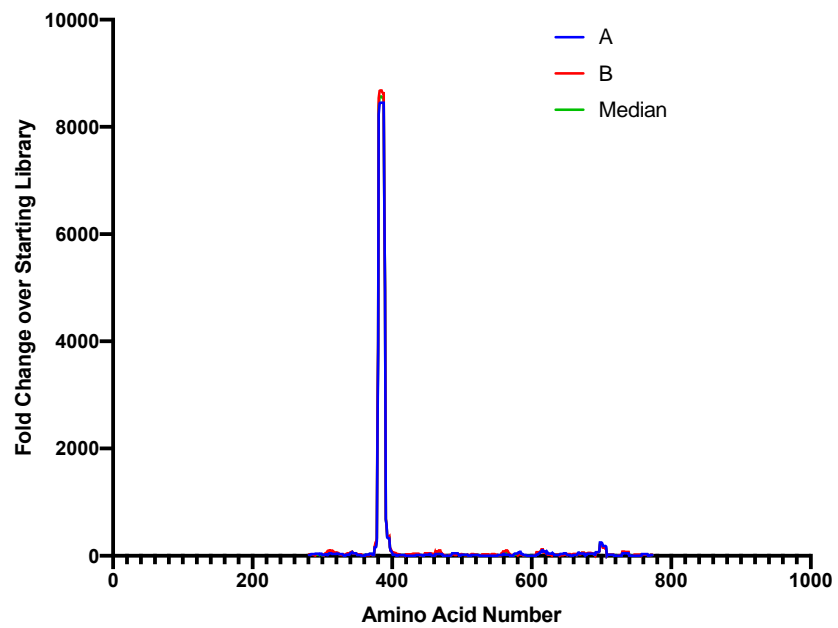

### Full Alignment

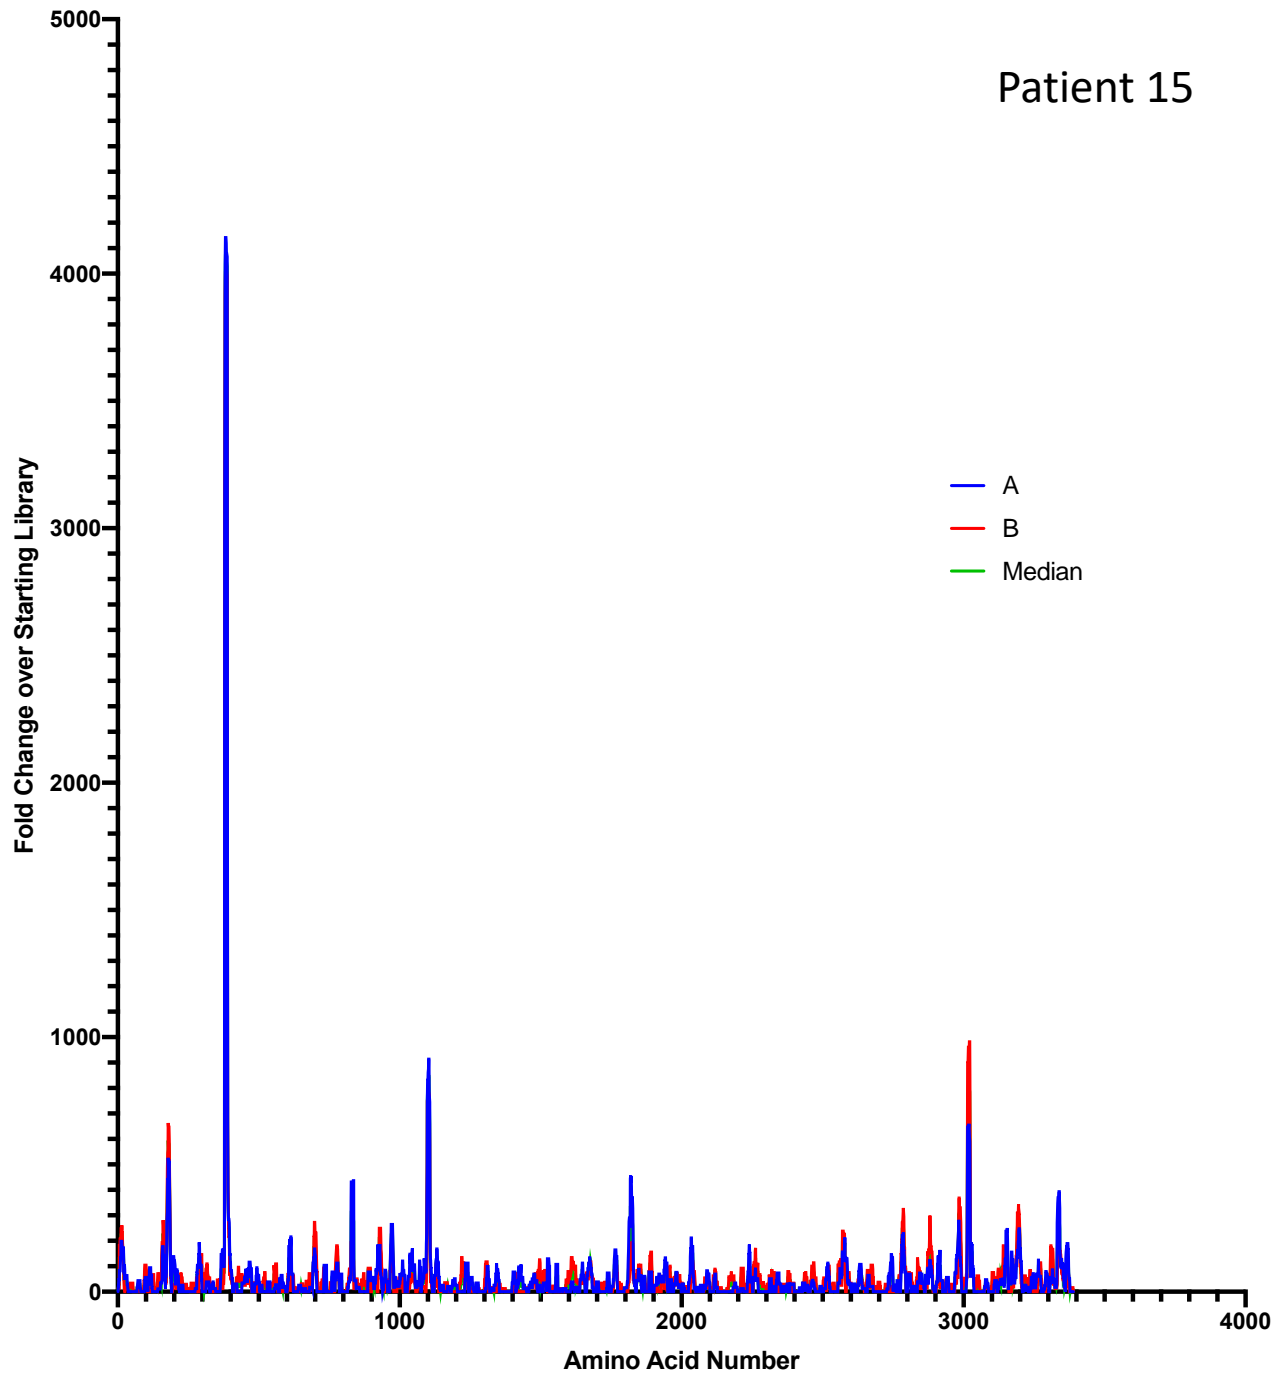

### NS1

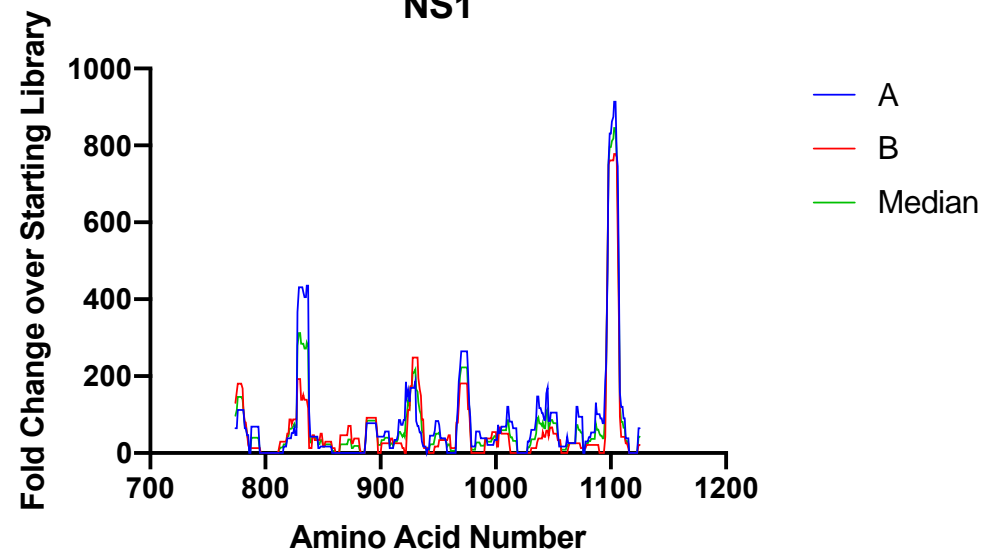

### Envelope

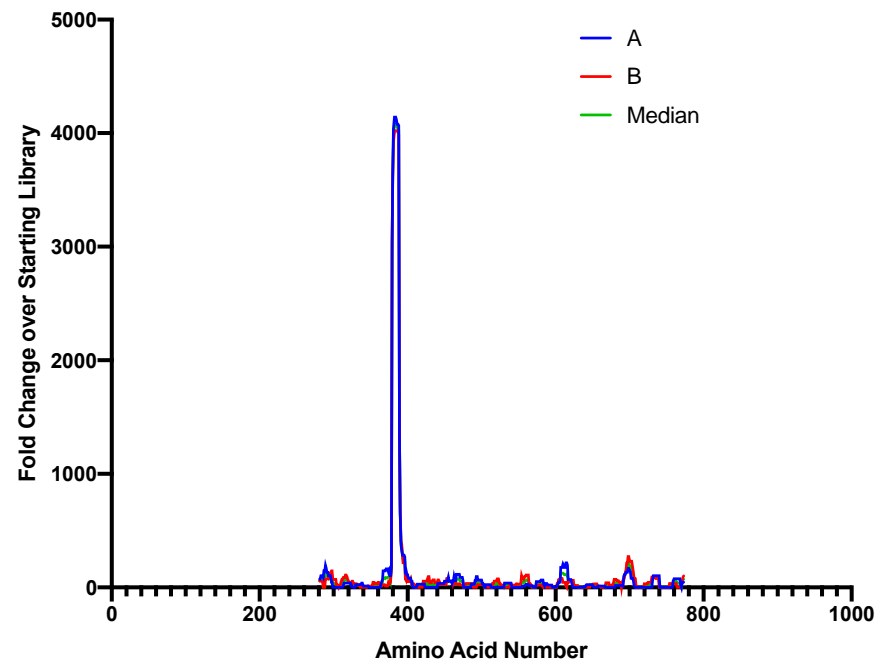

### Full Alignment

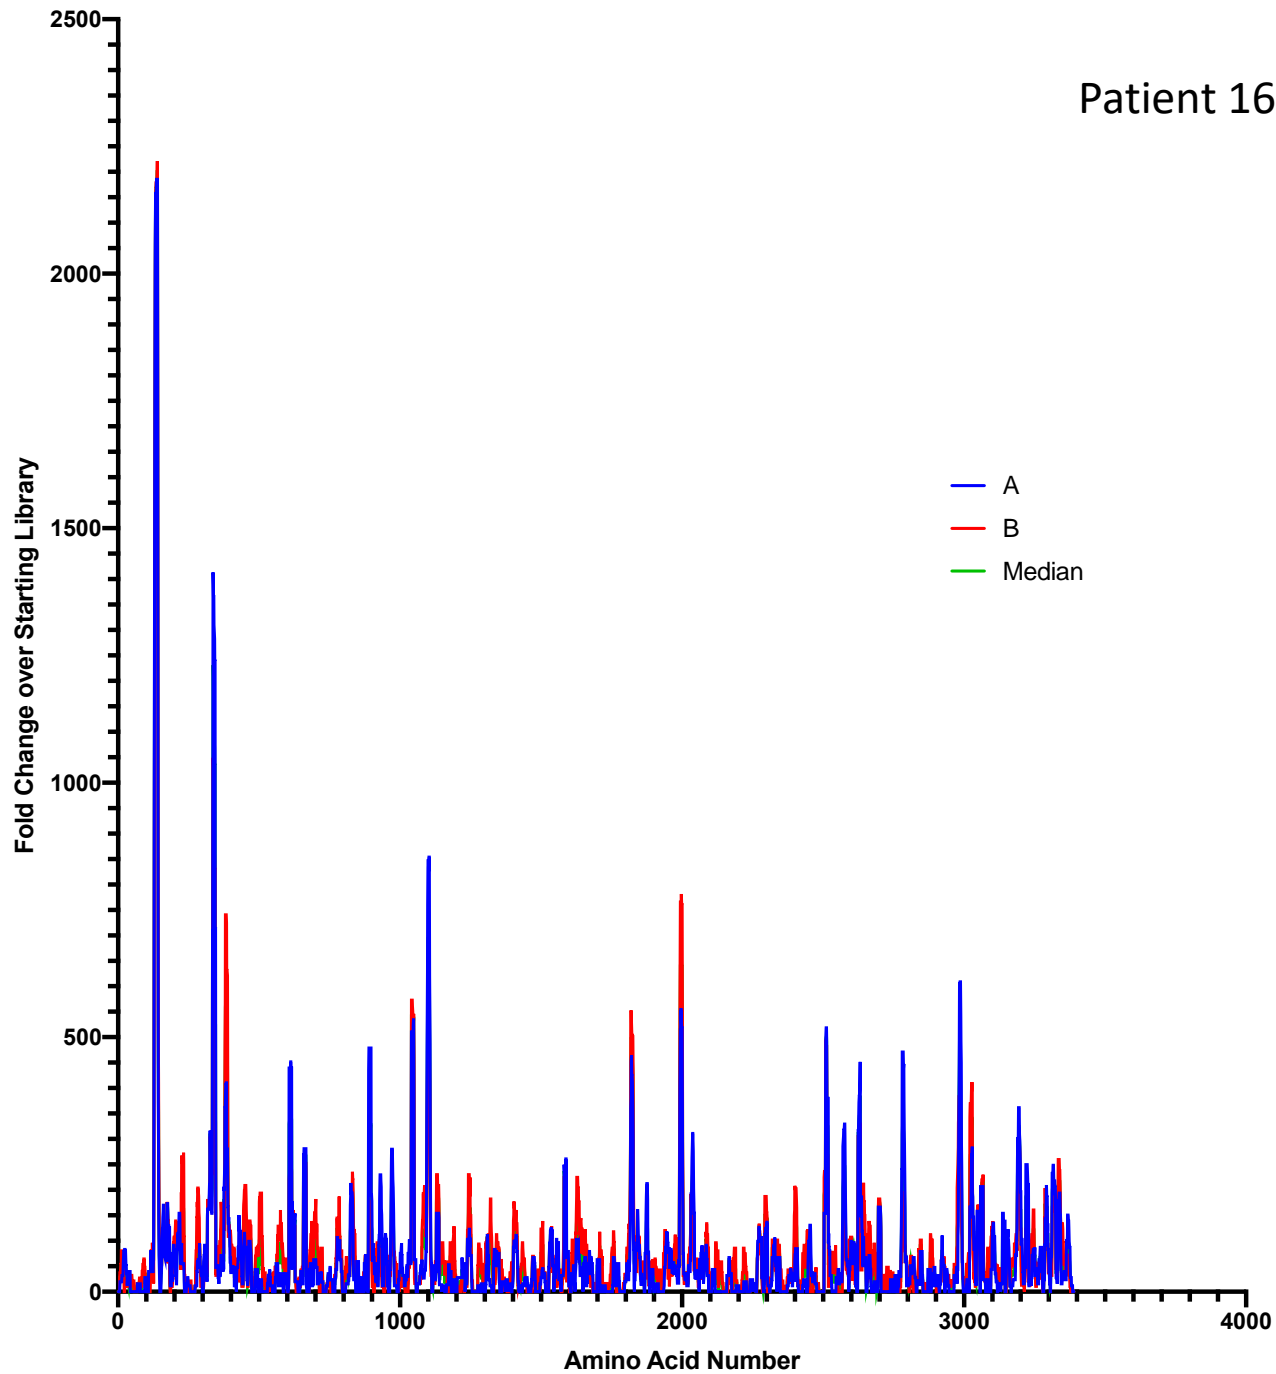

### NS1

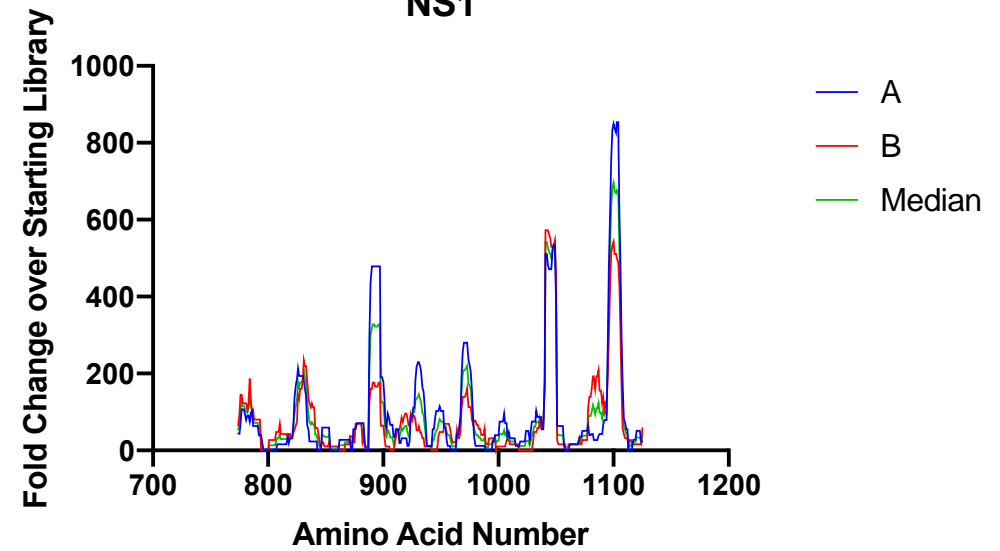

### Envelope

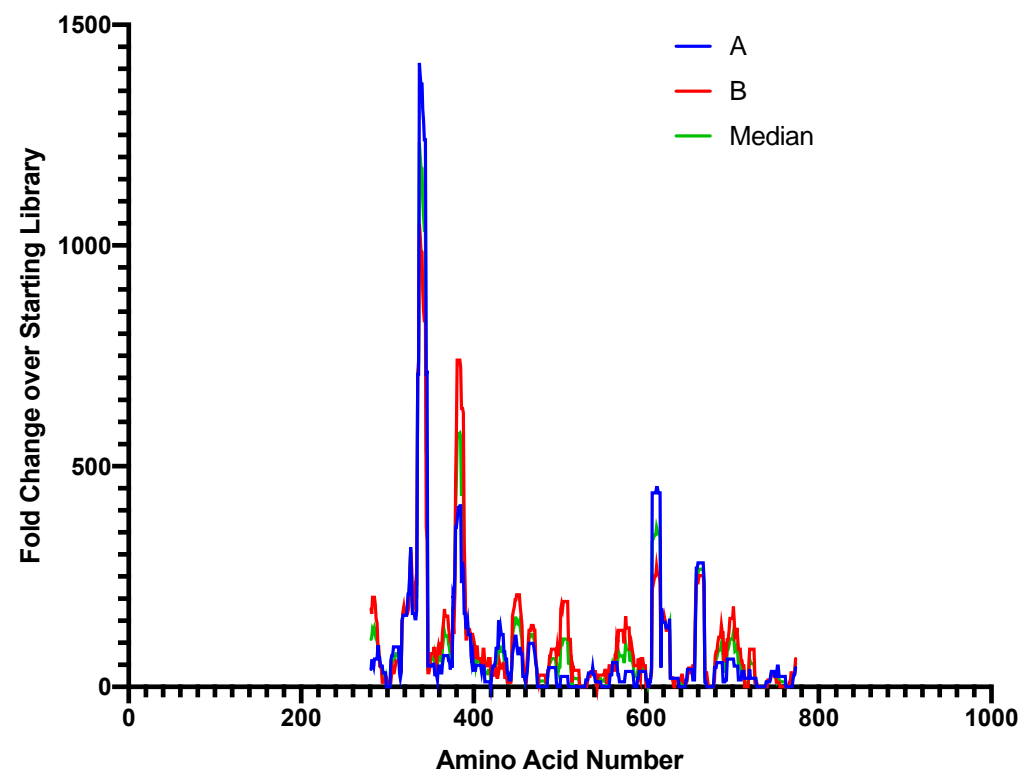

Full Alignment

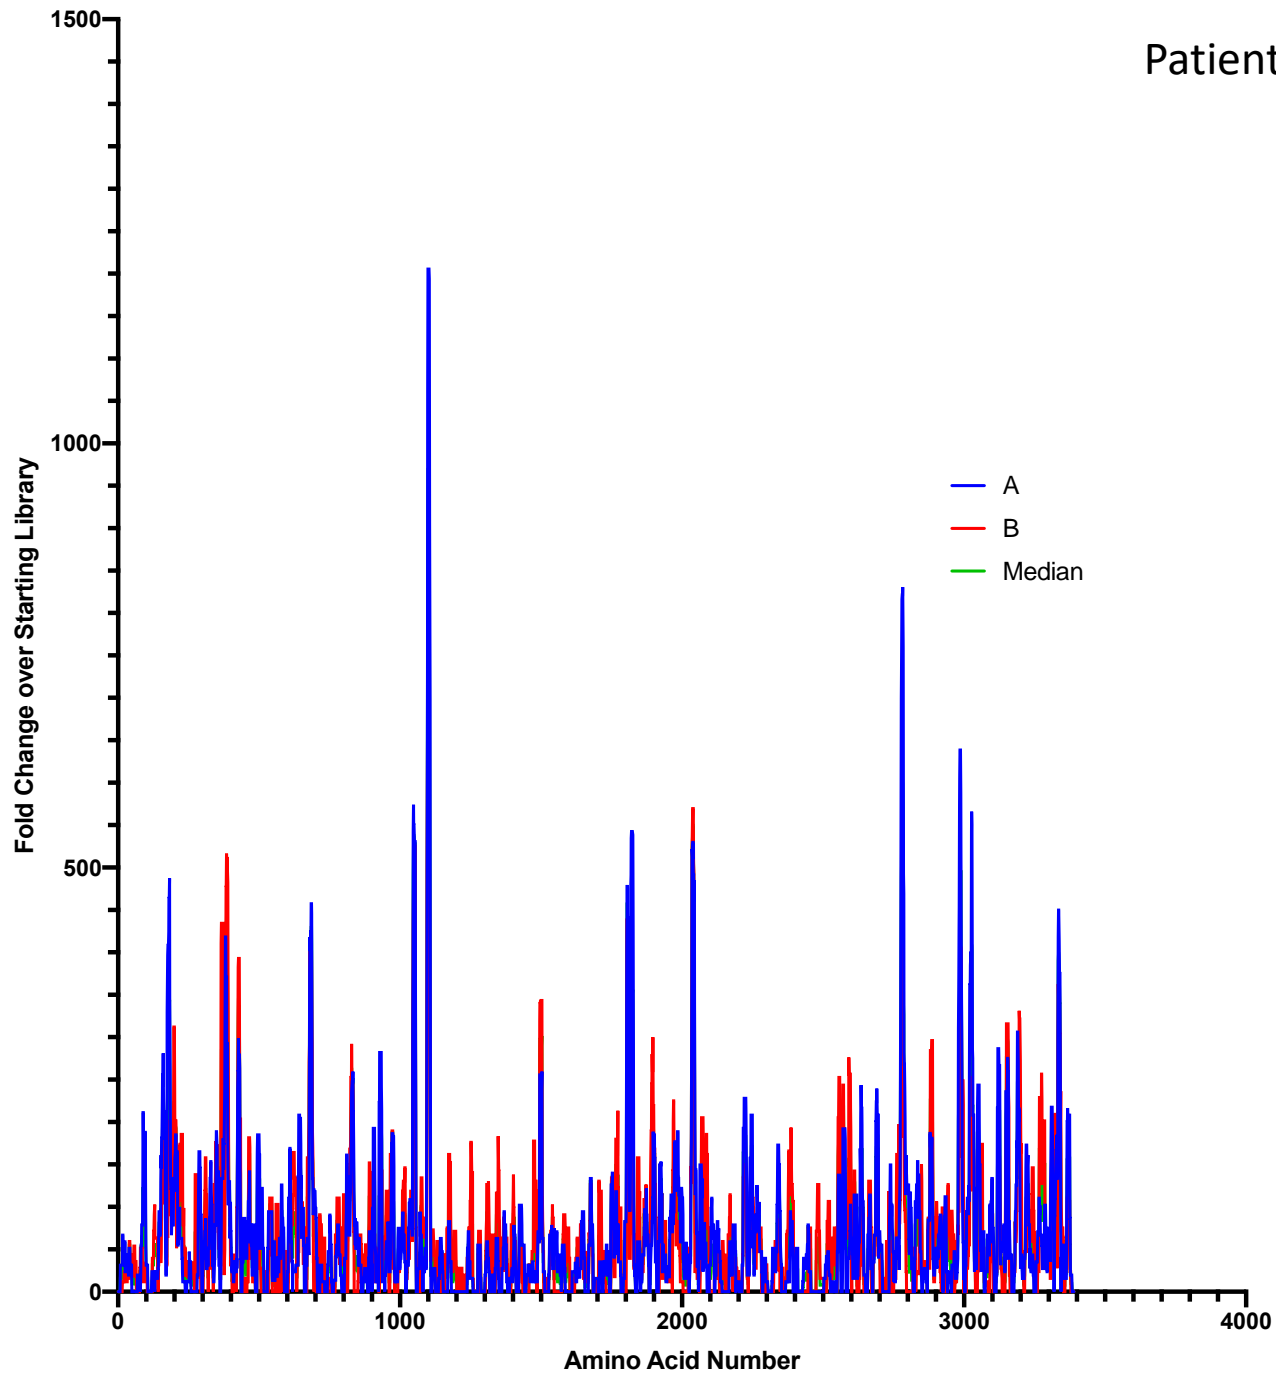

Patient 17

NS1

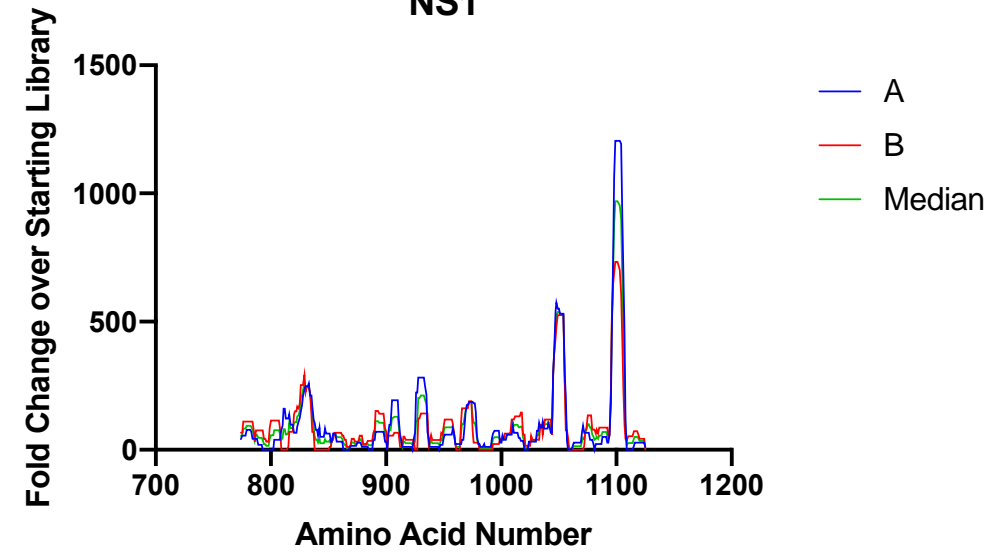

Envelope

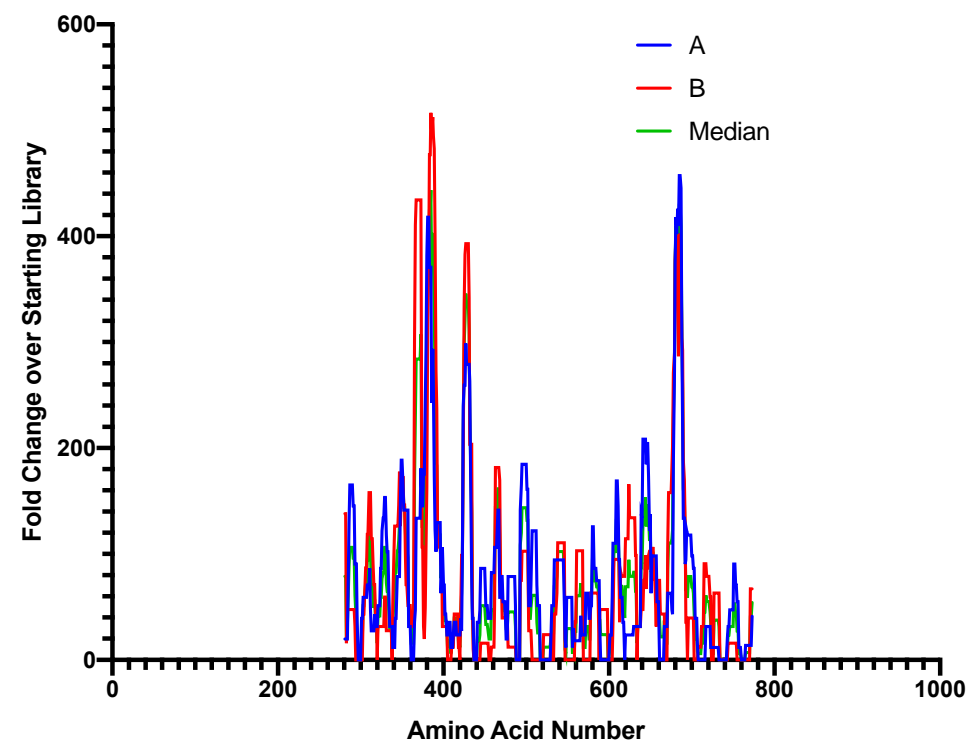



### Full Alignment

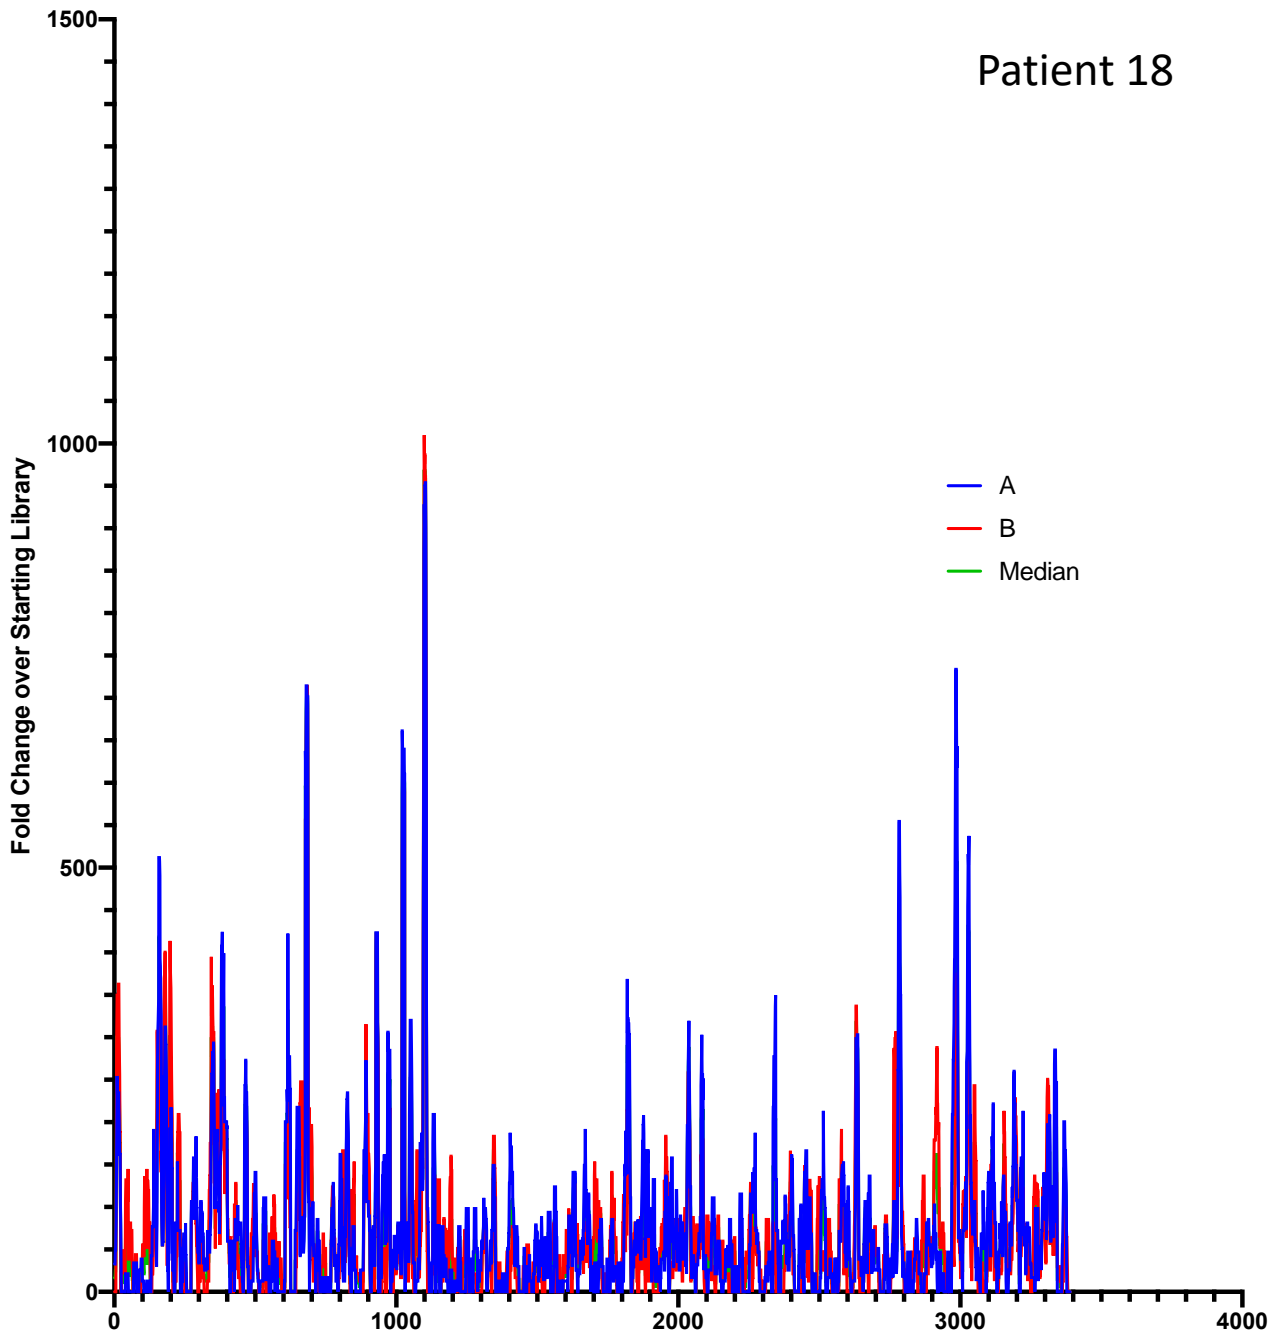

### NS1

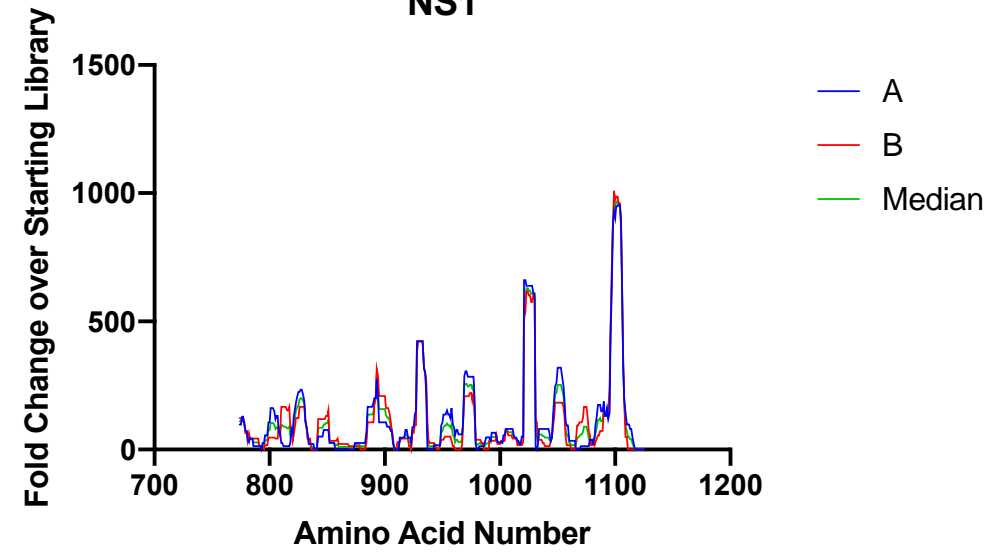

### Envelope

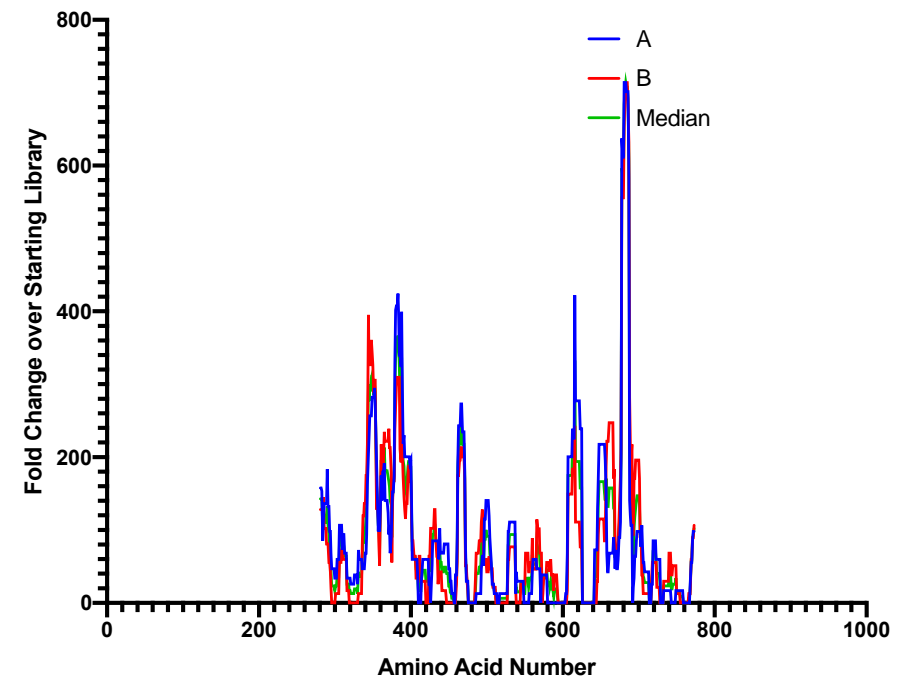

Full Alignment

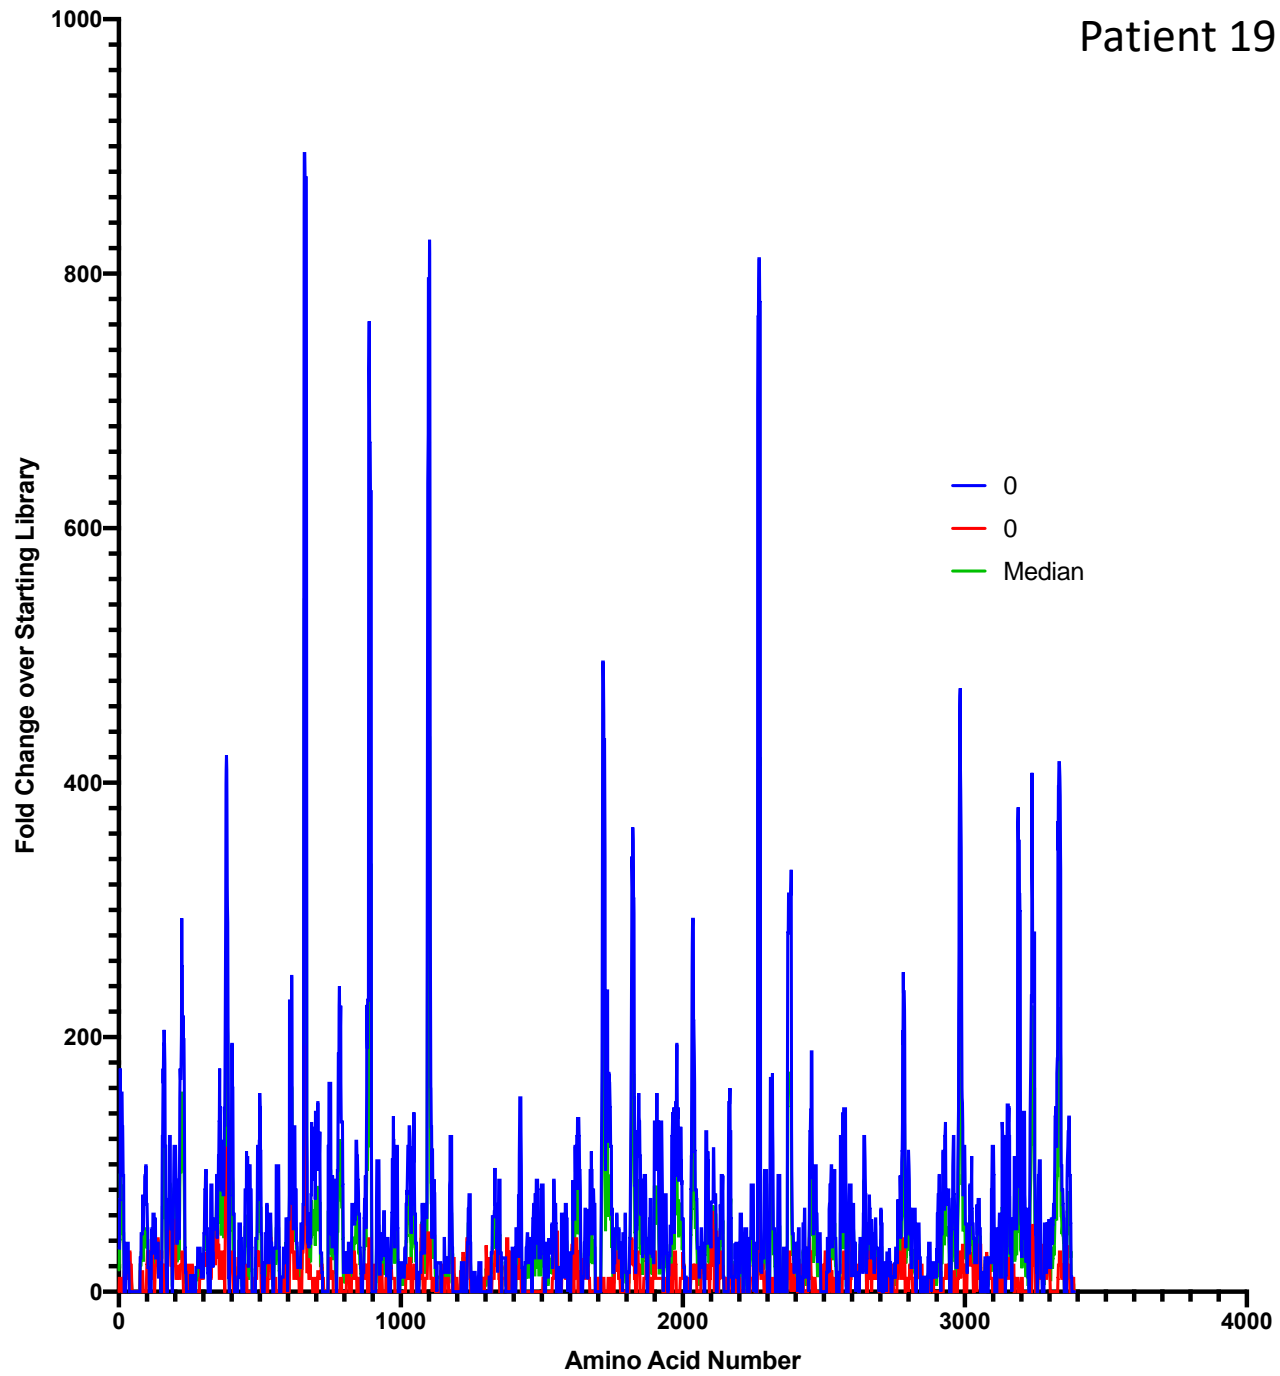

NS1

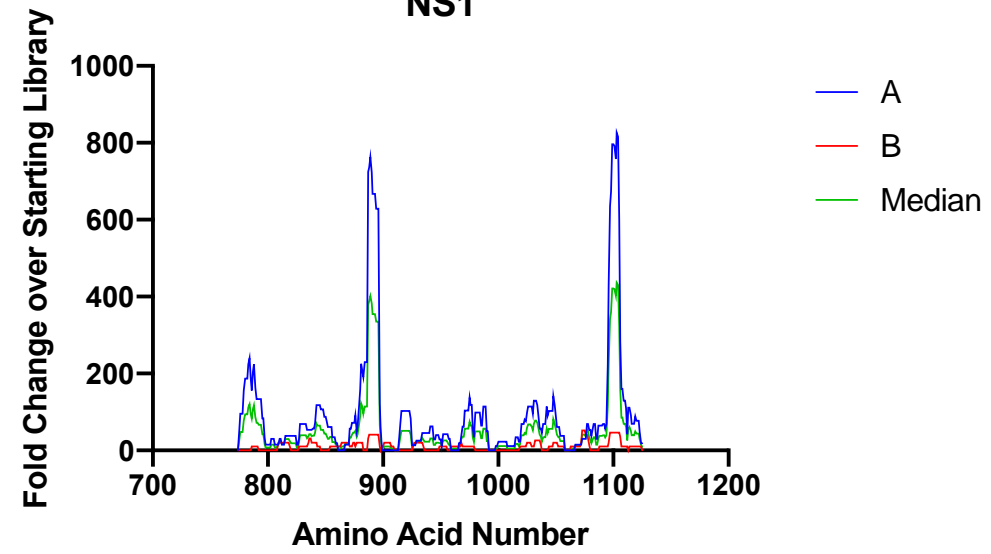

Envelope

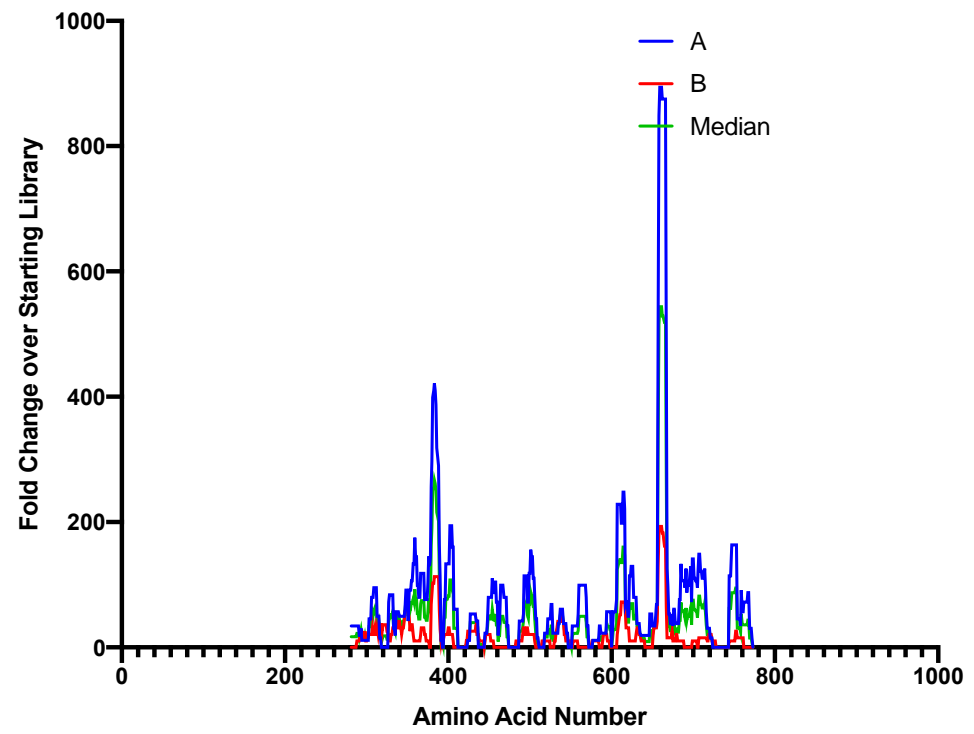

Full Alignment

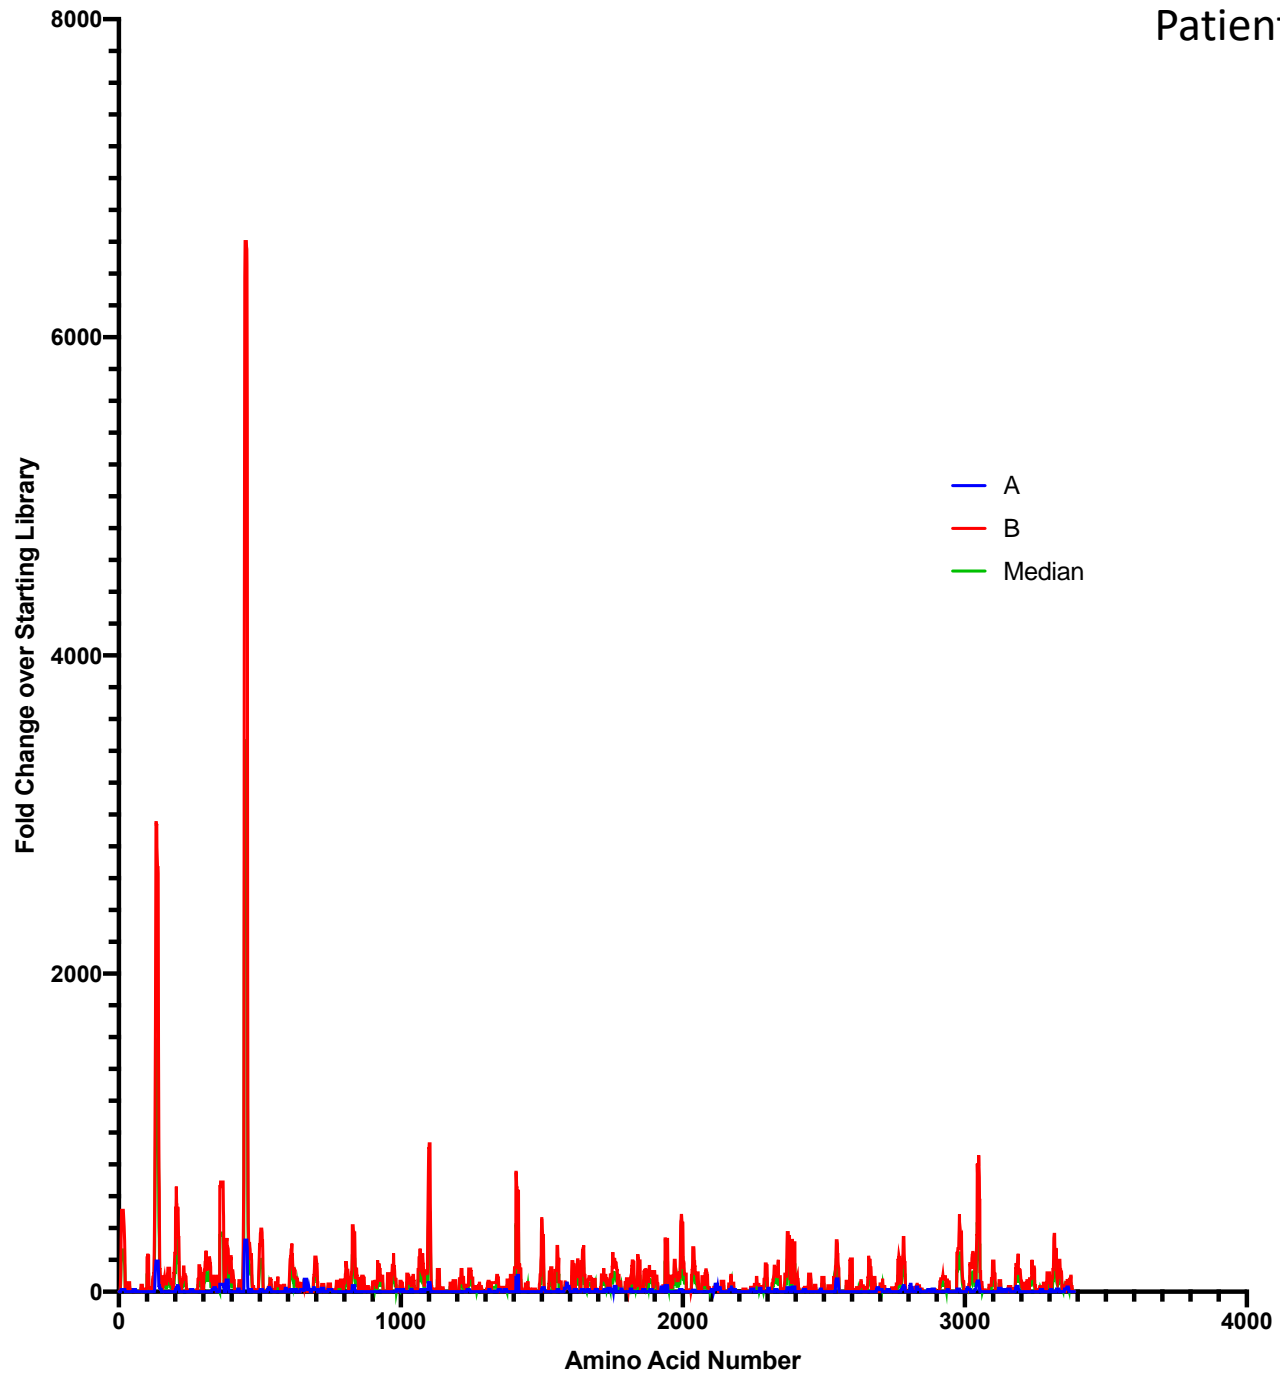

Patient 20

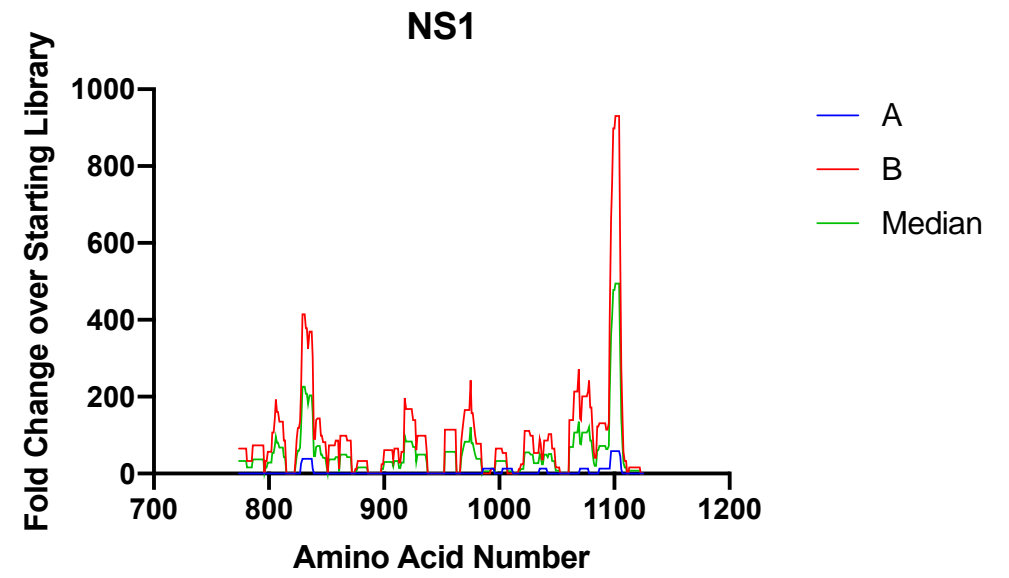

Envelope

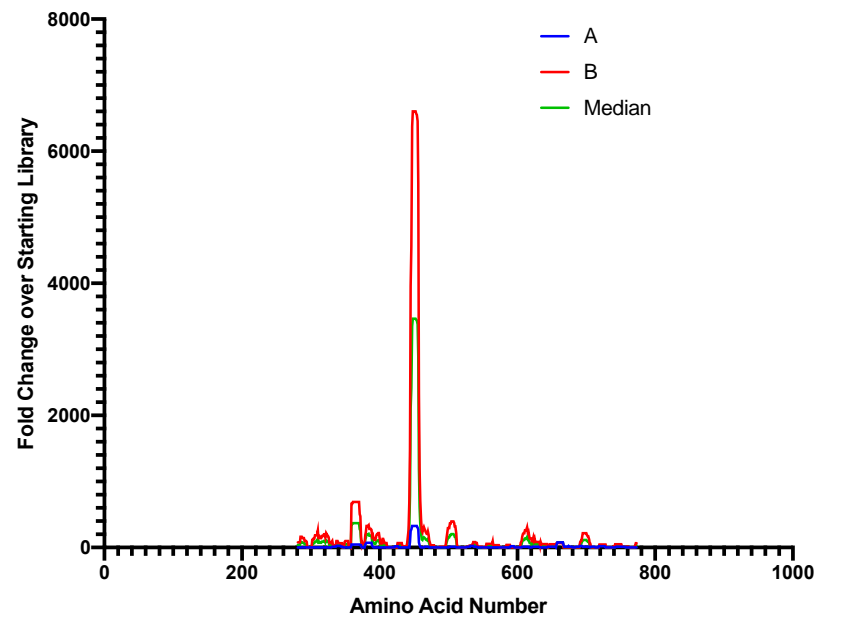

### Full Alignment

Patient 21

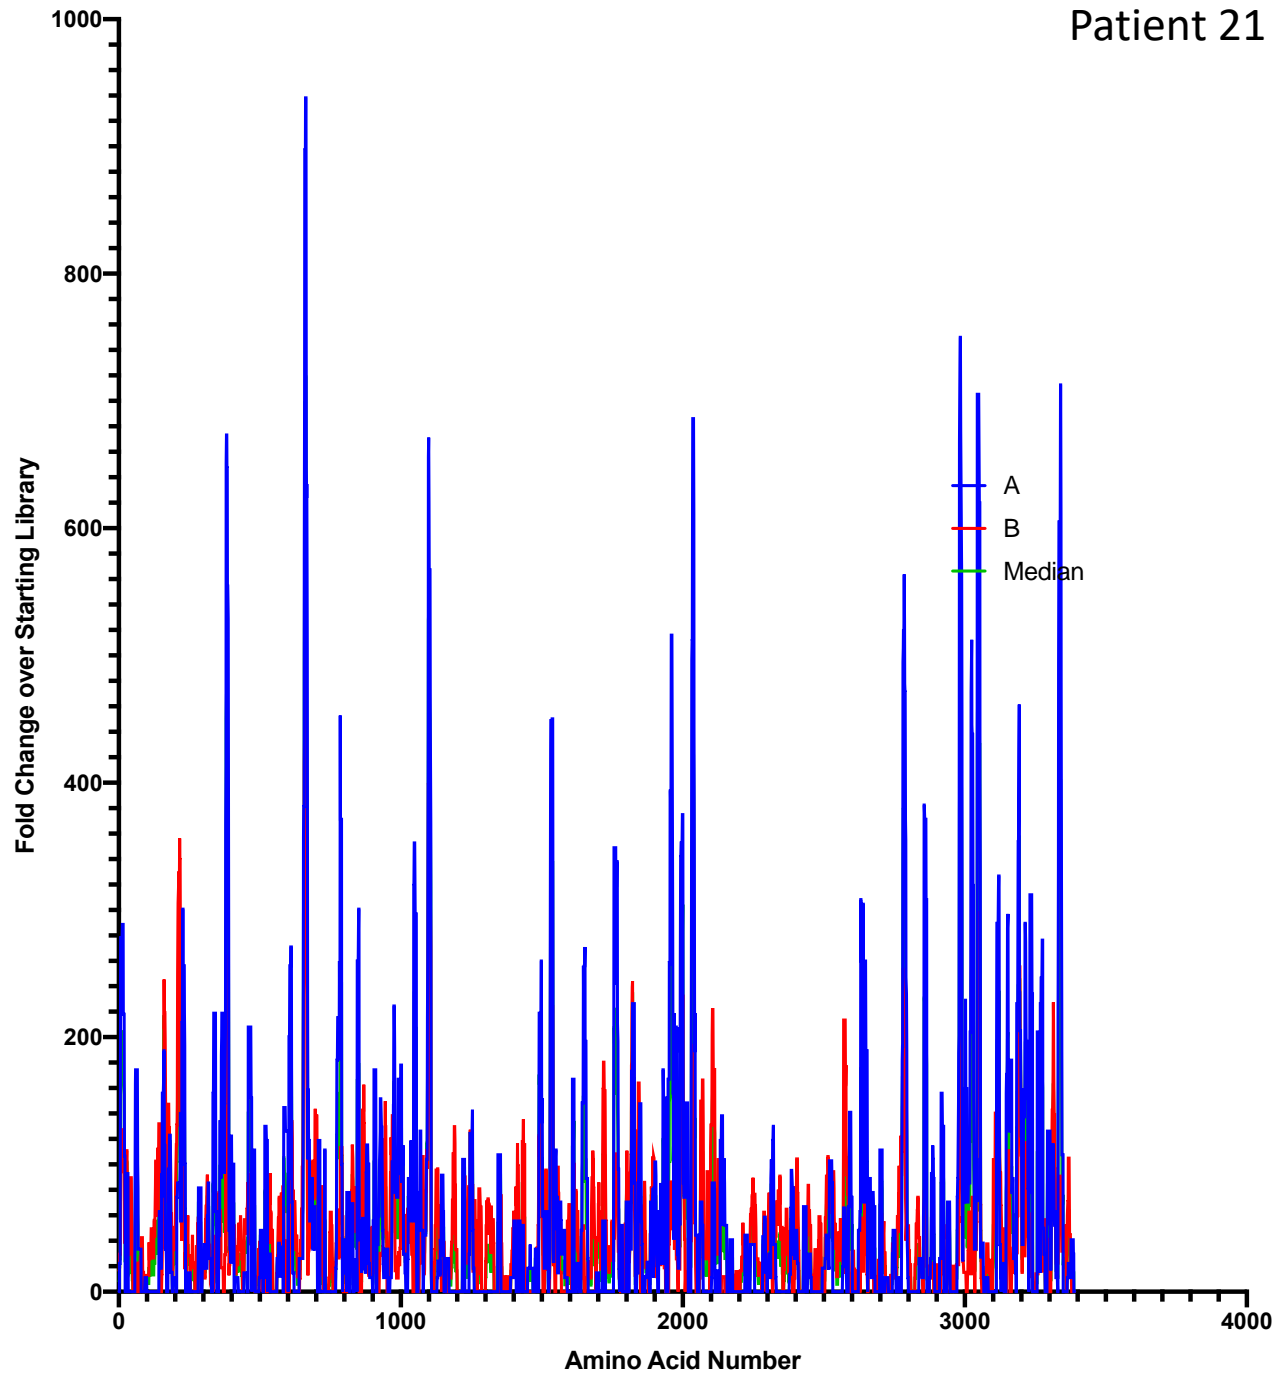

### Envelope

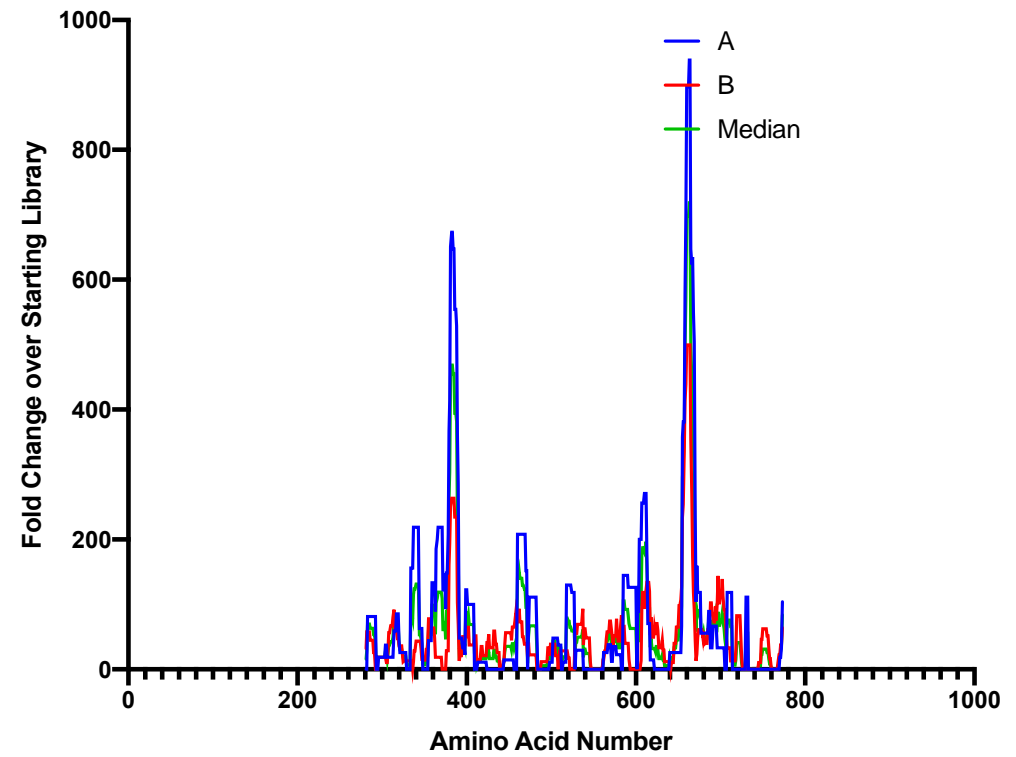

### NS1

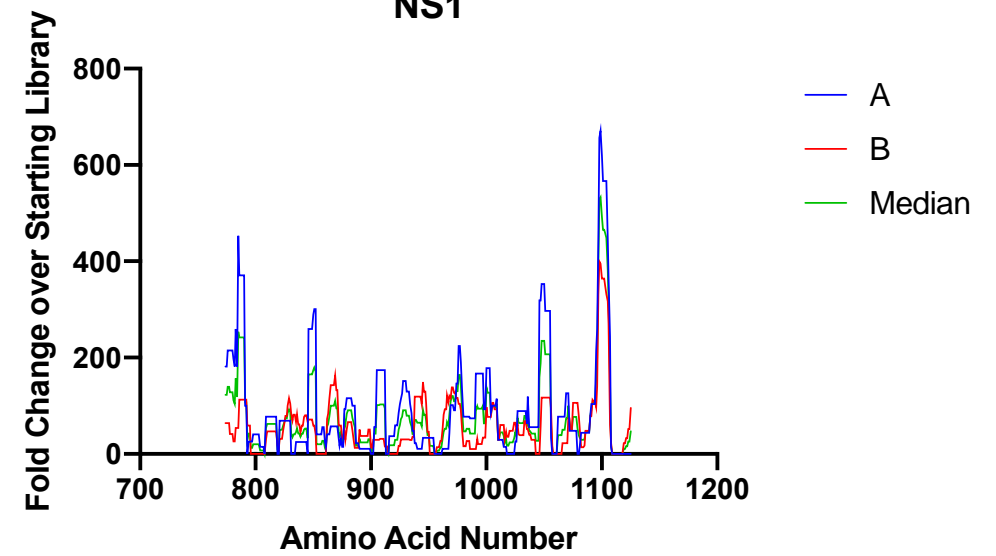

### Full Alignment

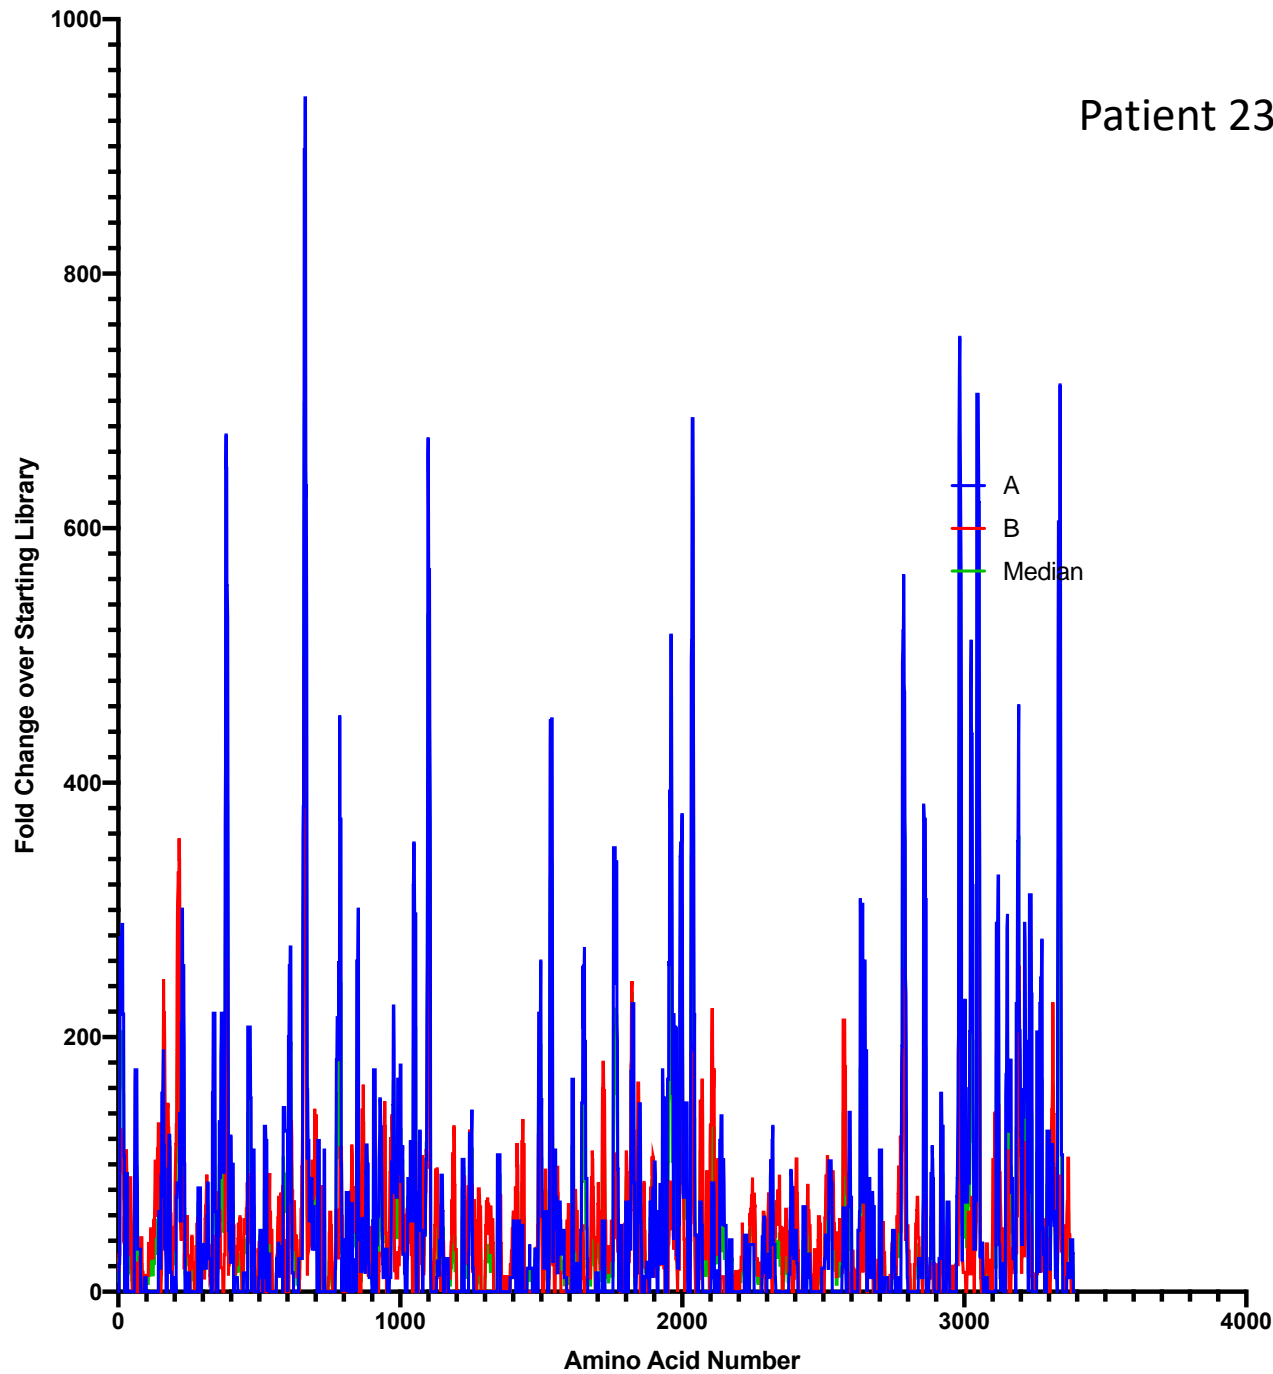

### NS1

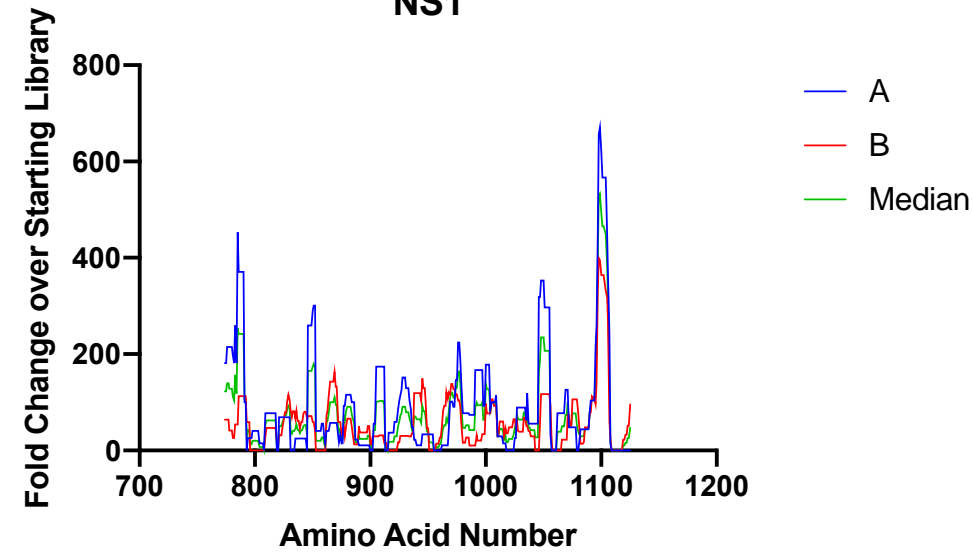

### Envelope

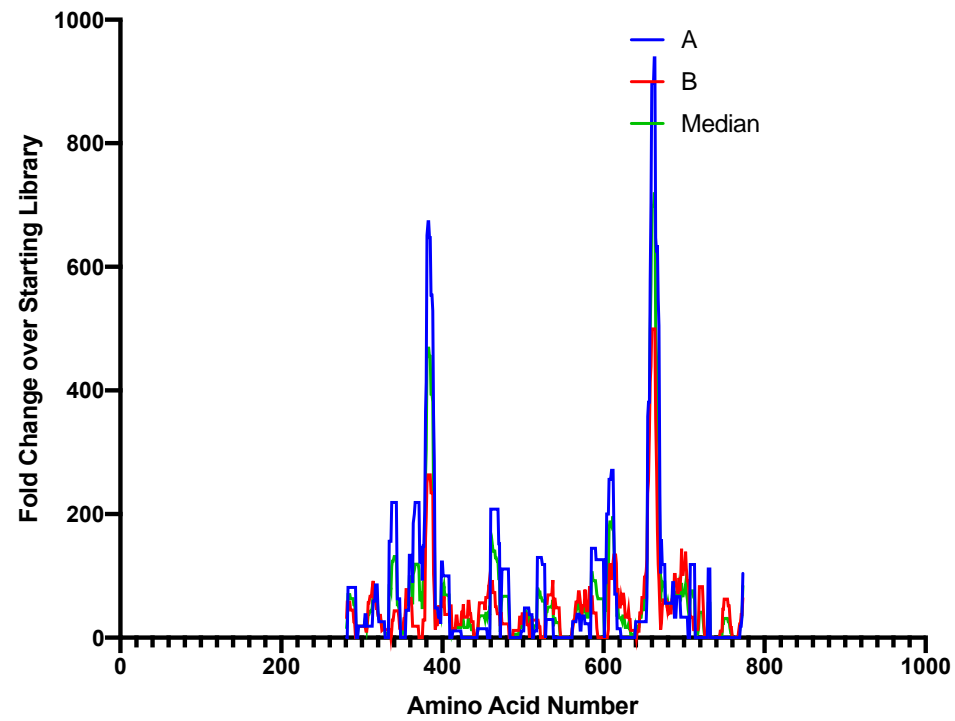

Full Alignment

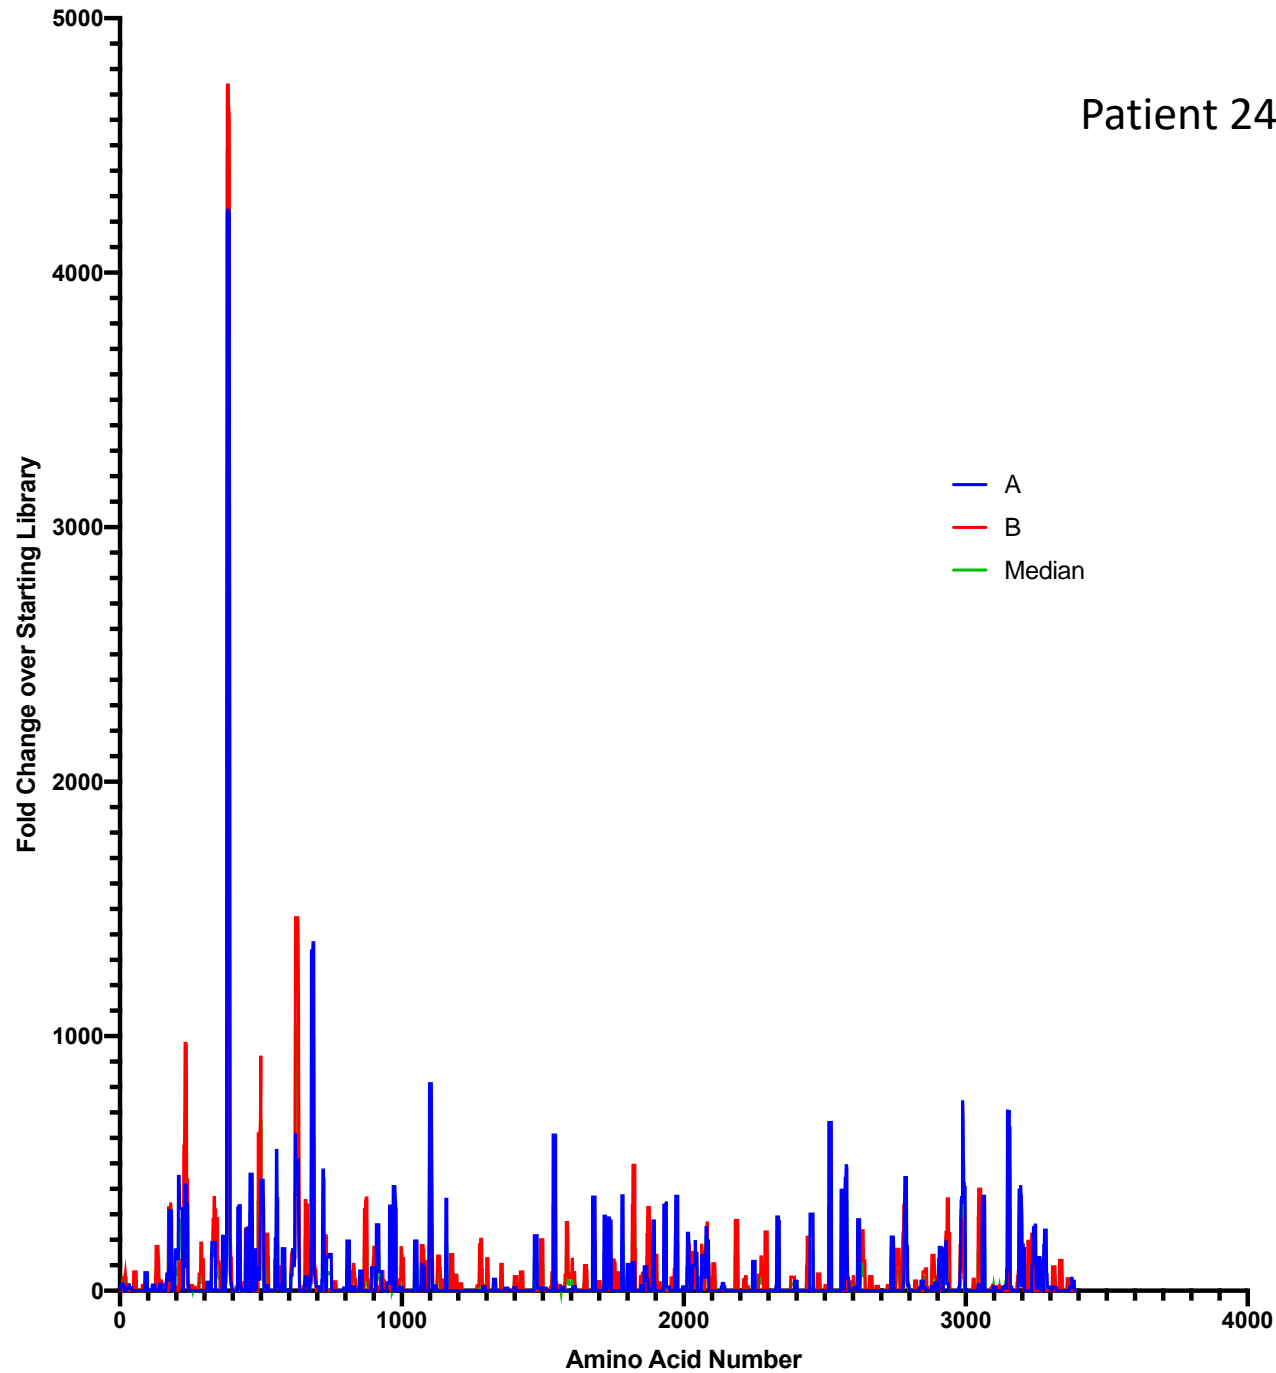

NS1

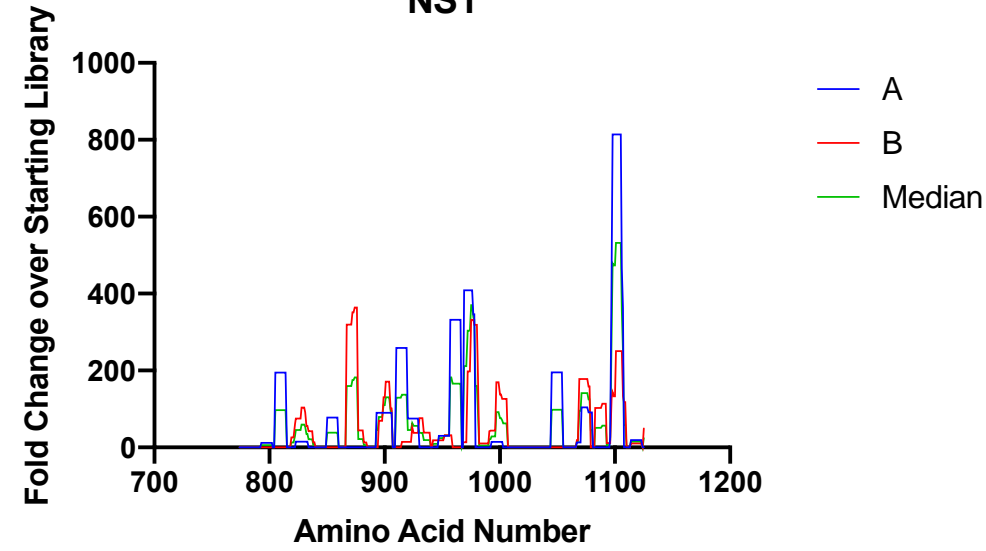

Envelope

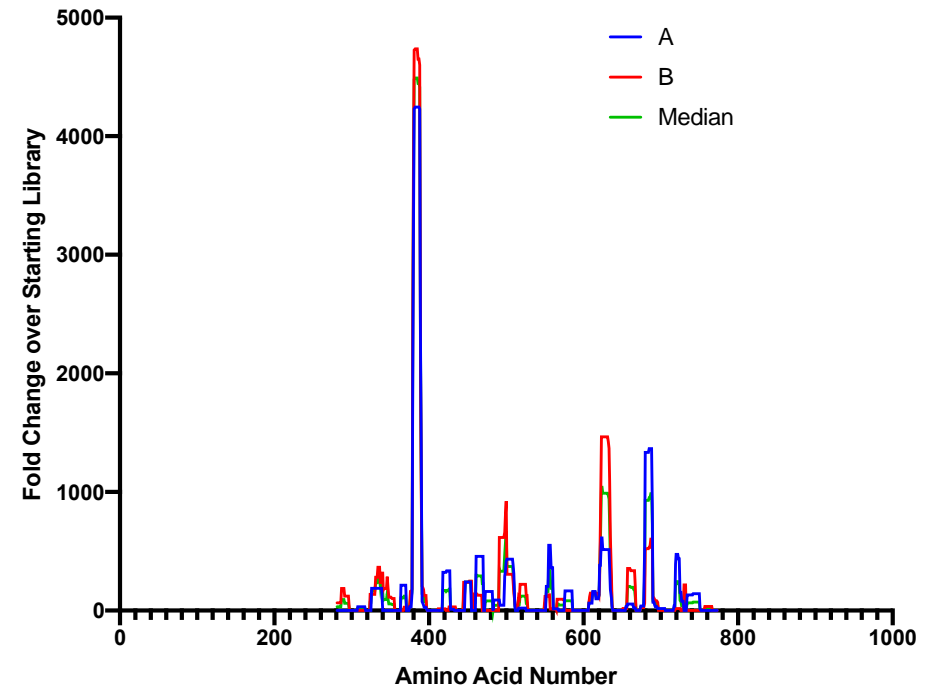

### Full Alignment

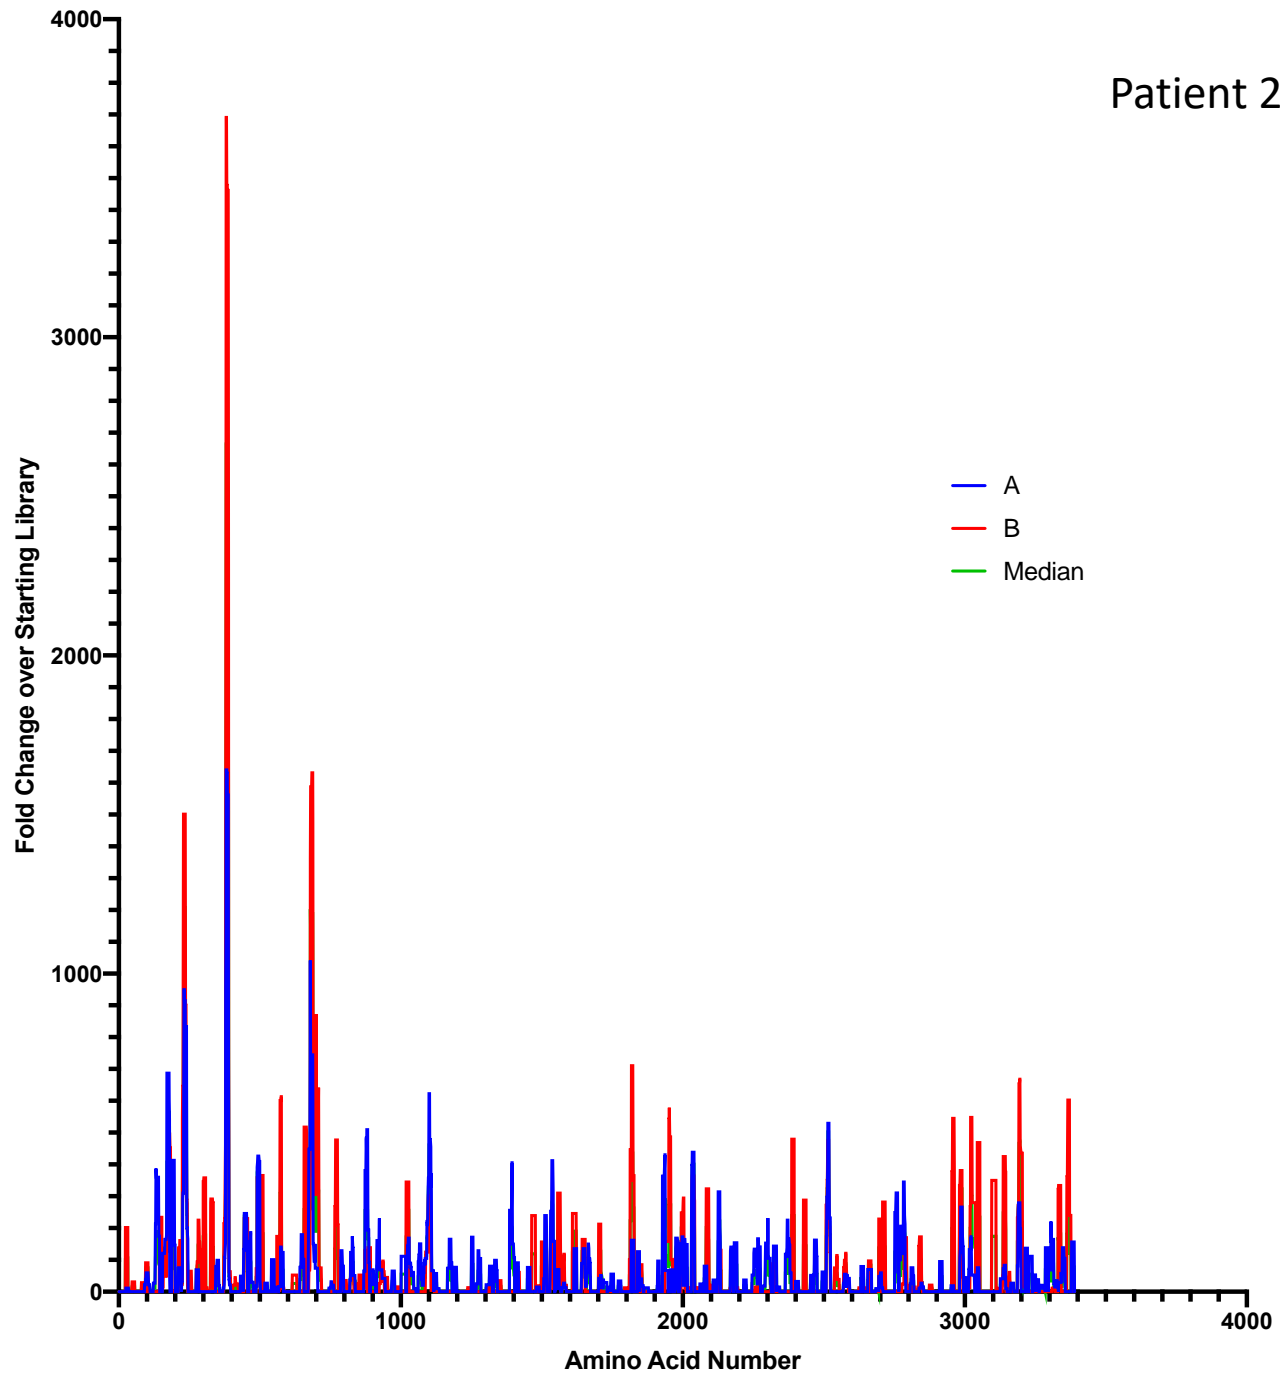

Patient 25

### NS1

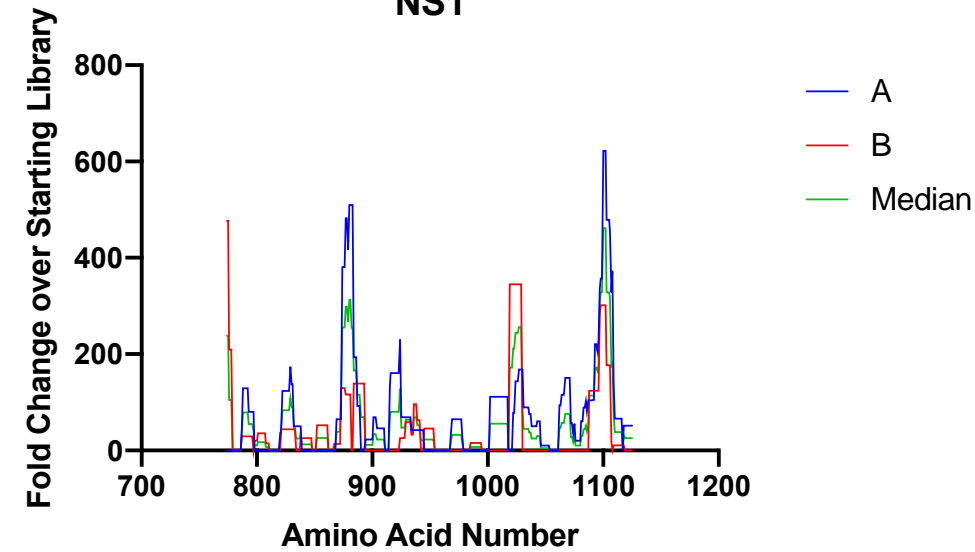

### Envelope

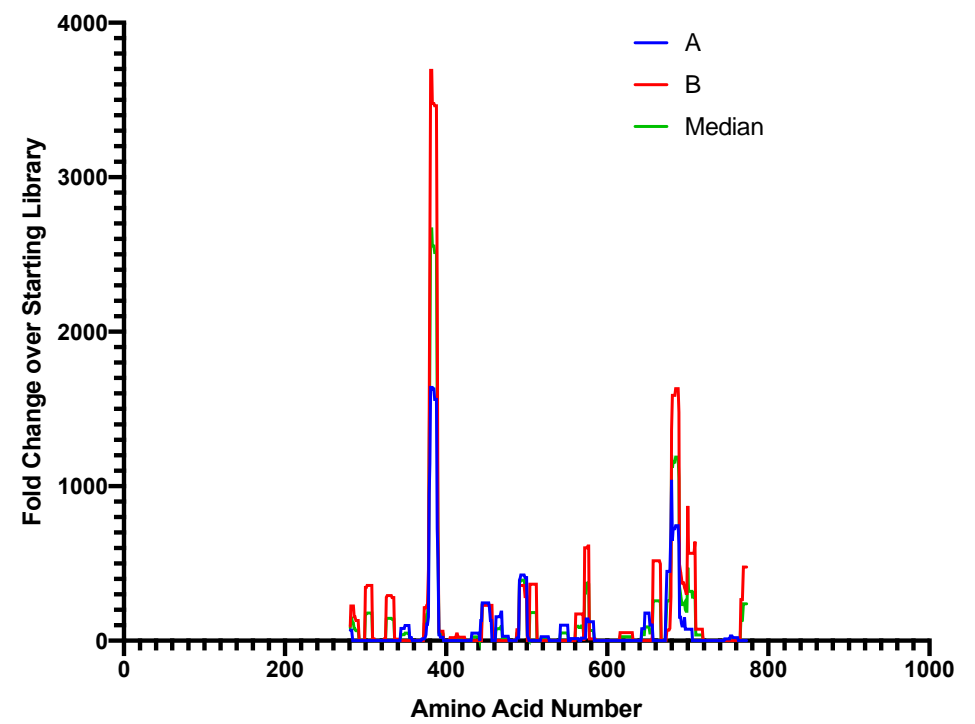

### Full Alignment

Patient 26

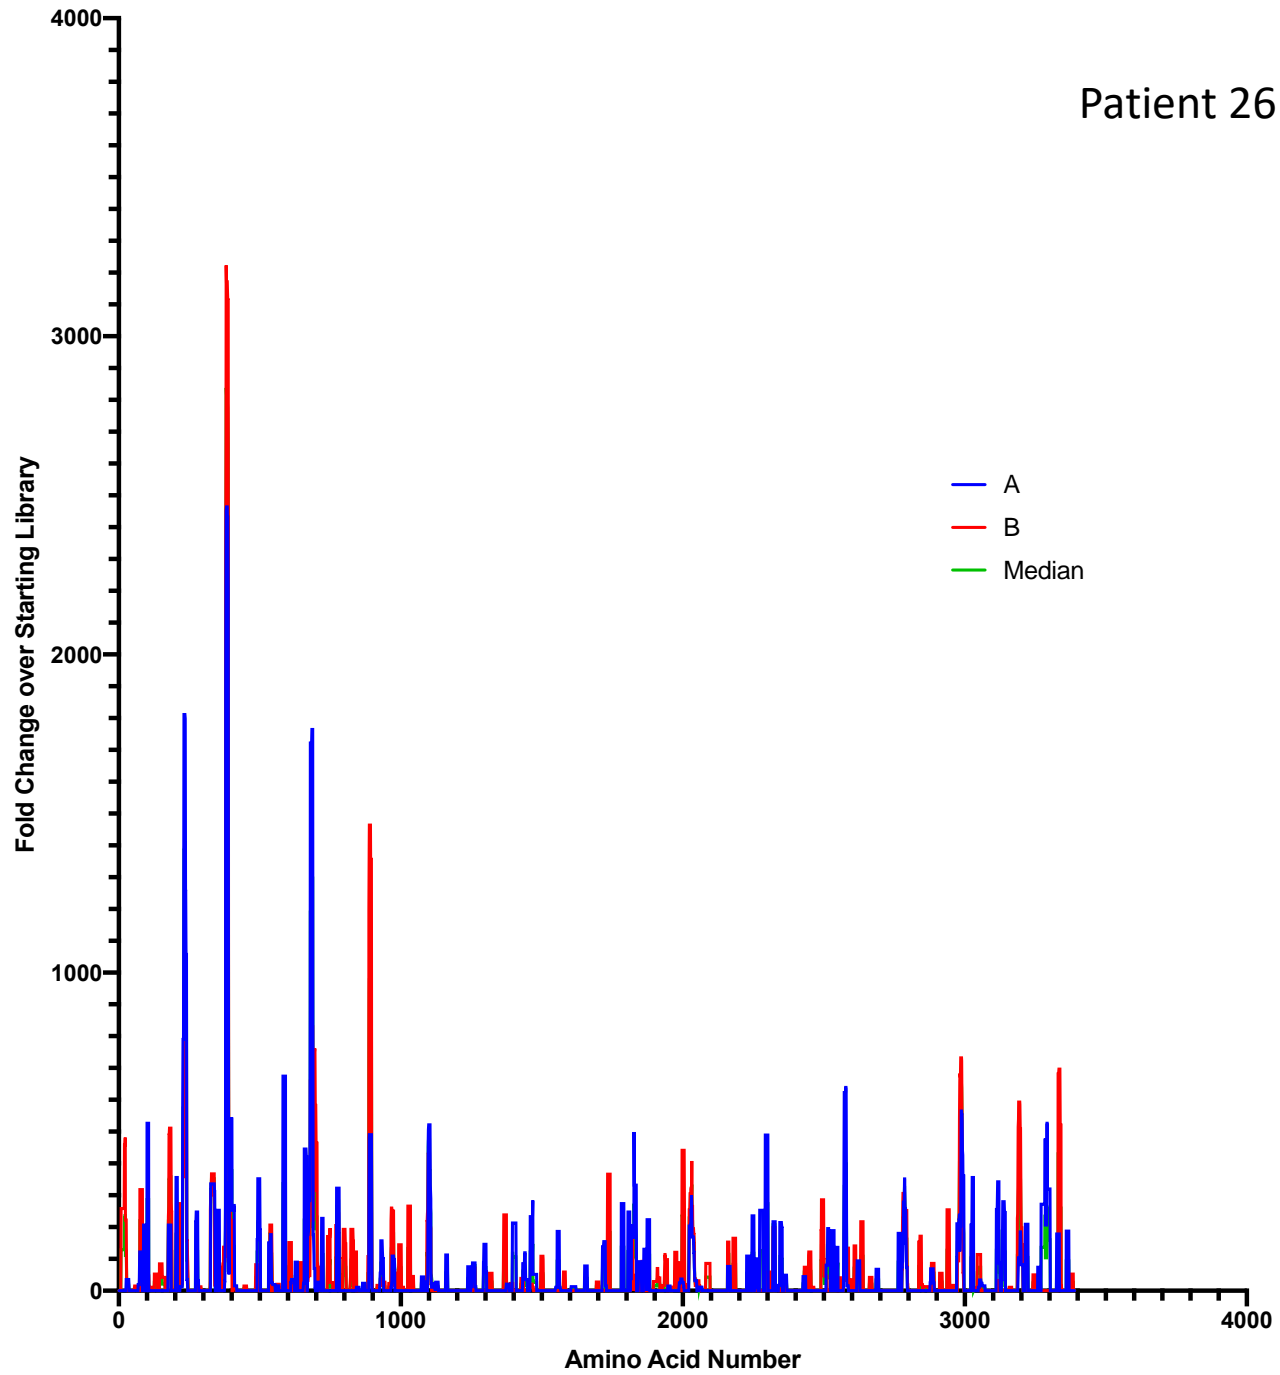

### NS1

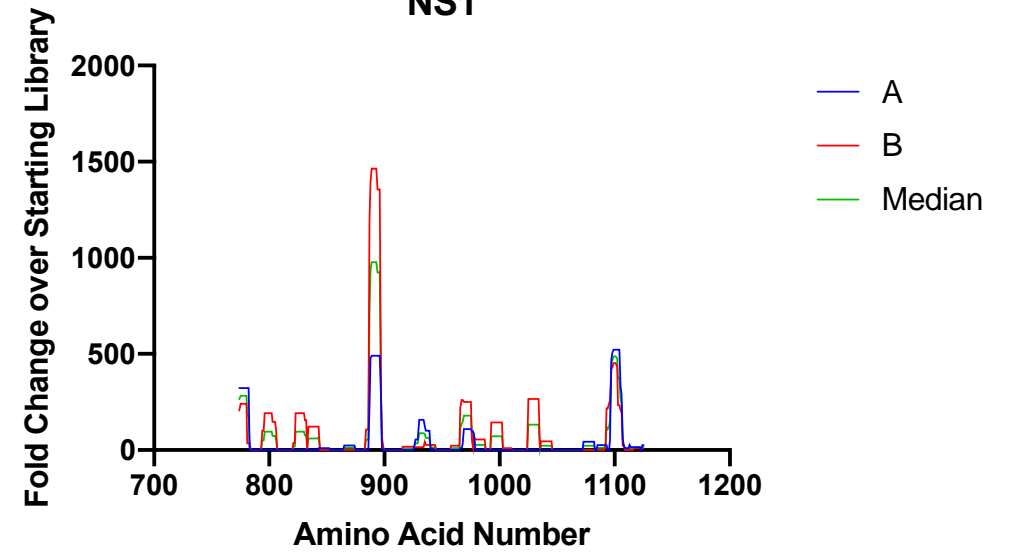

### Envelope

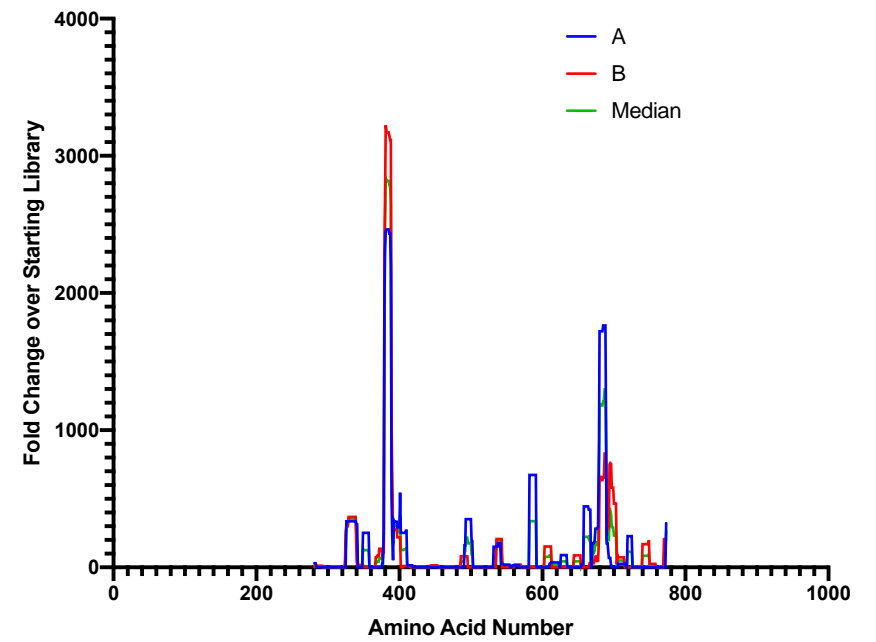



Full Alignment

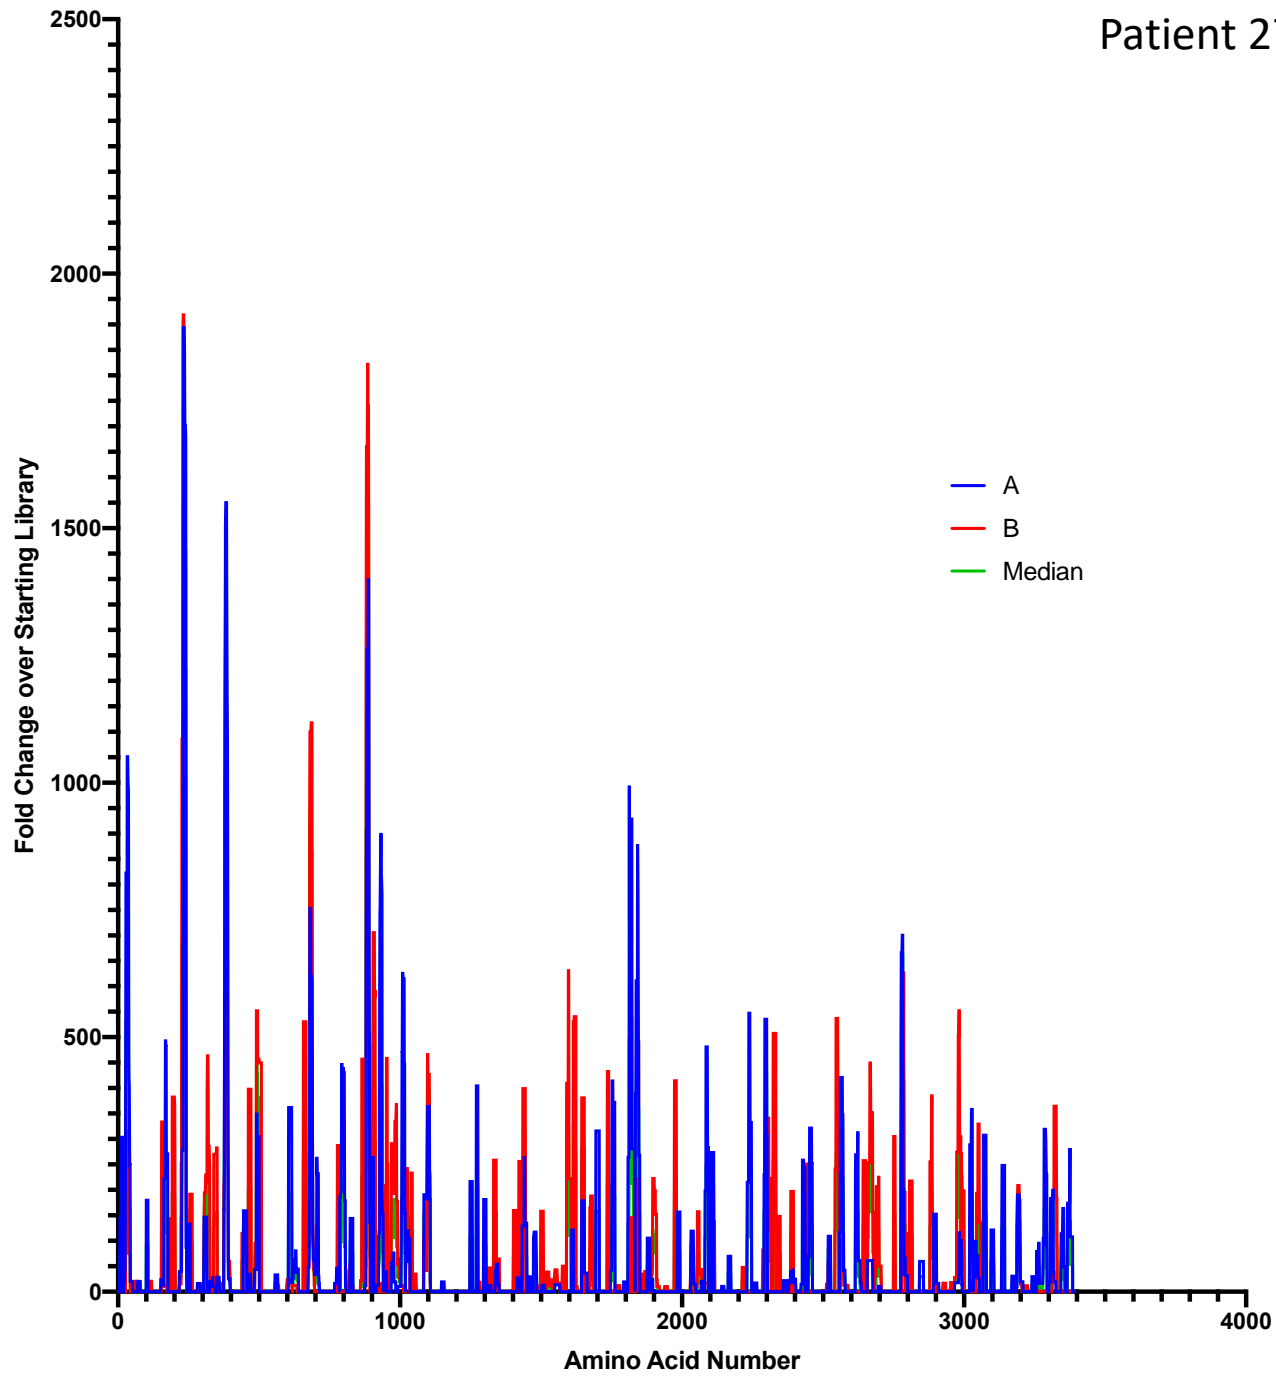

Patient 27

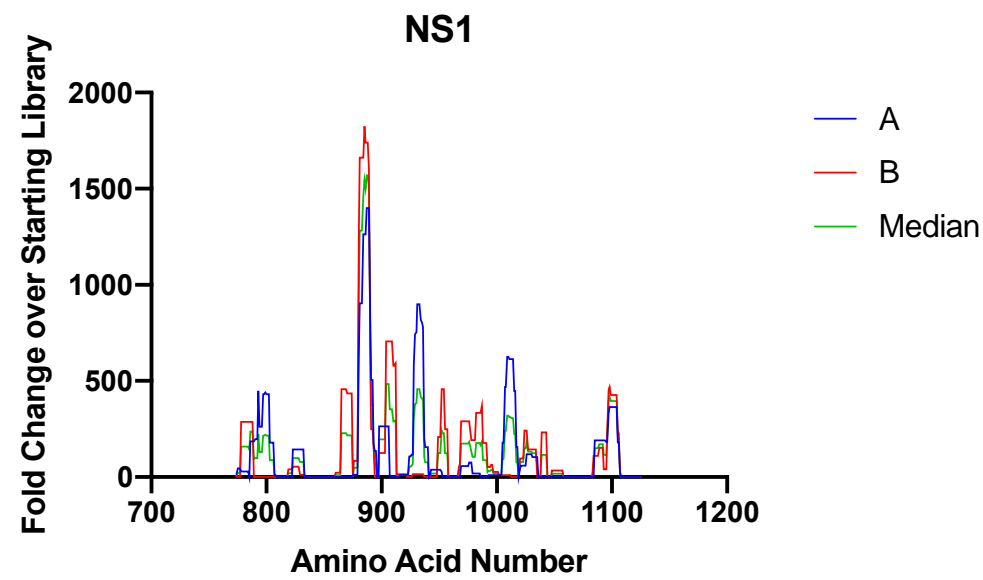

Envelope

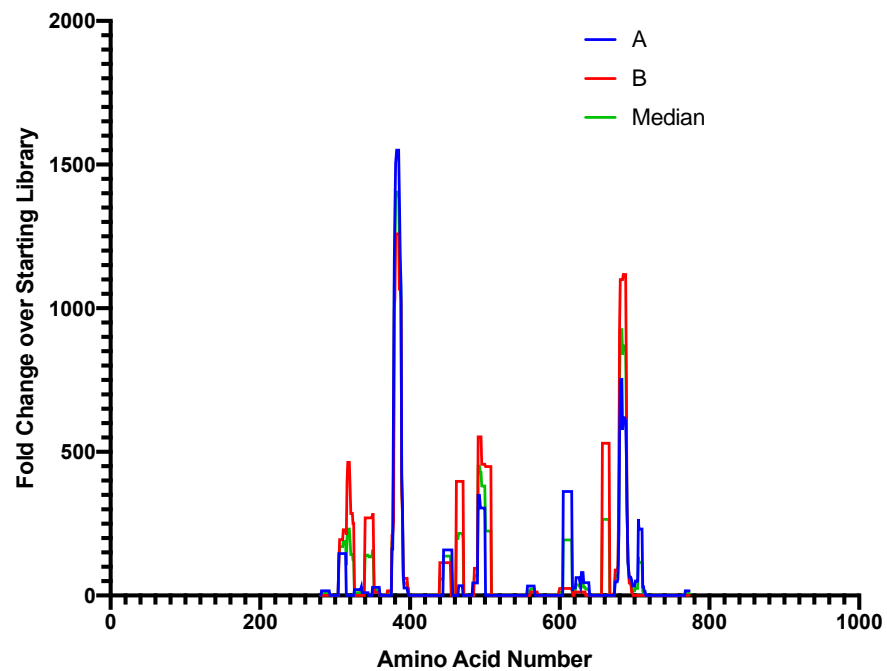

### Full Alignment

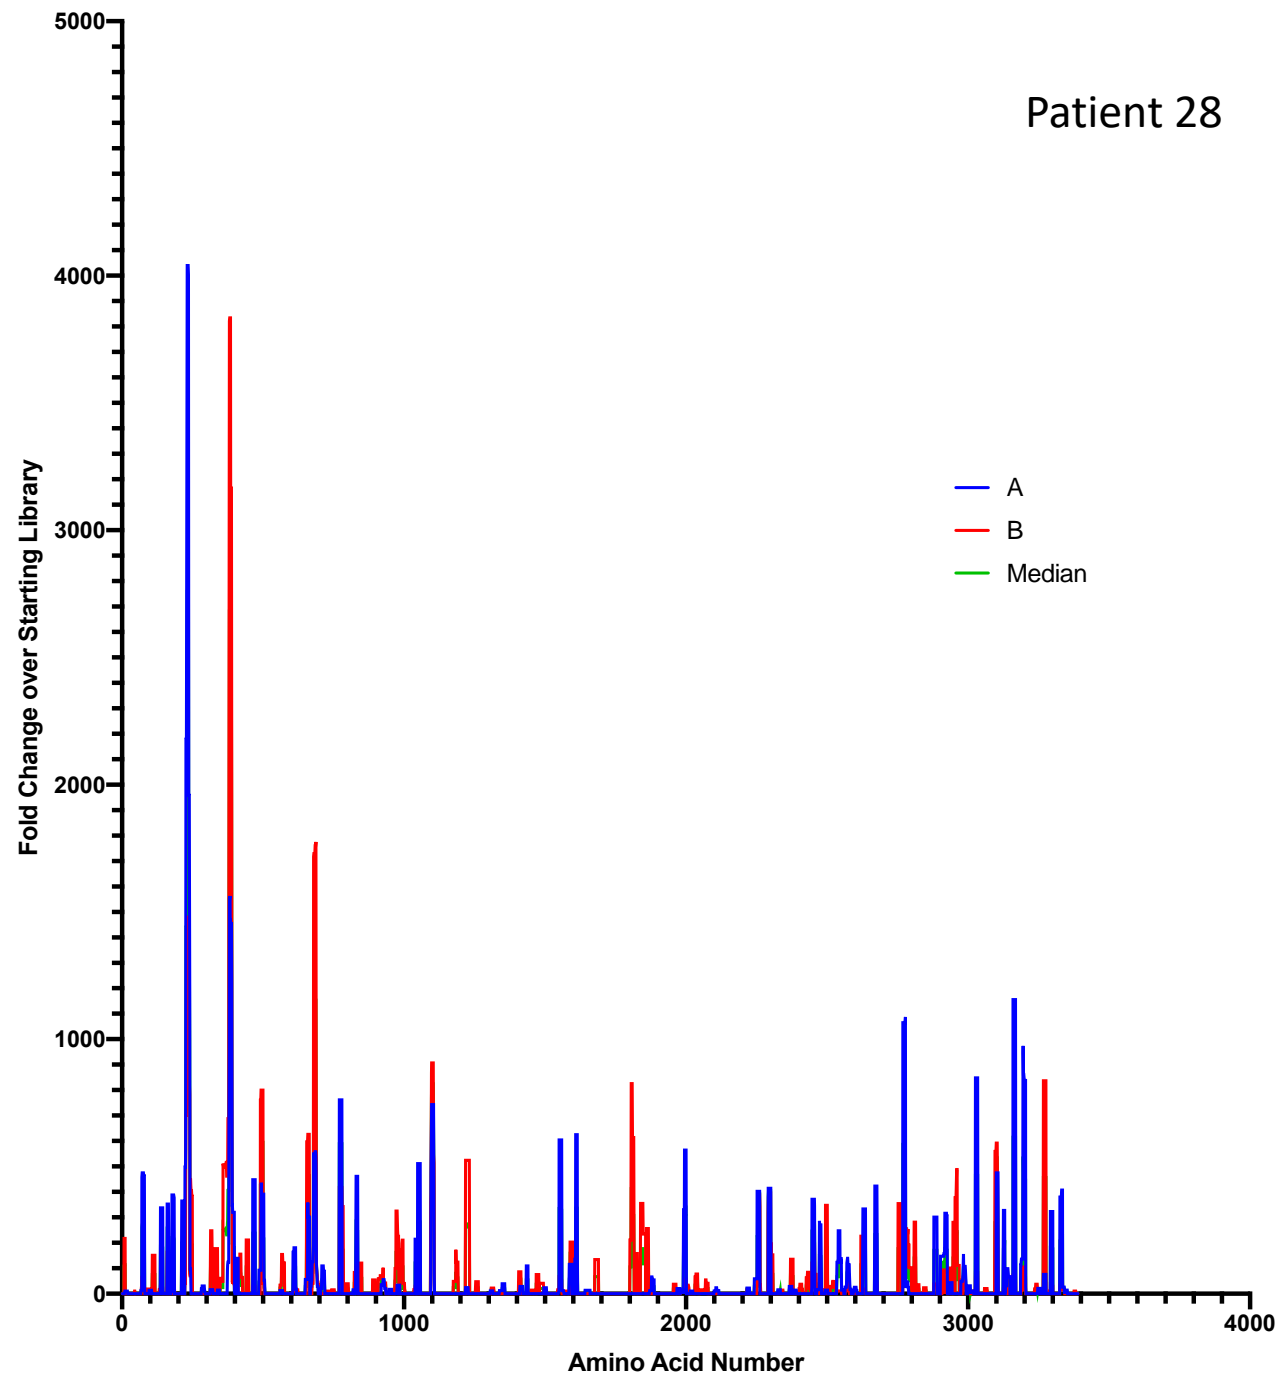

### NS1

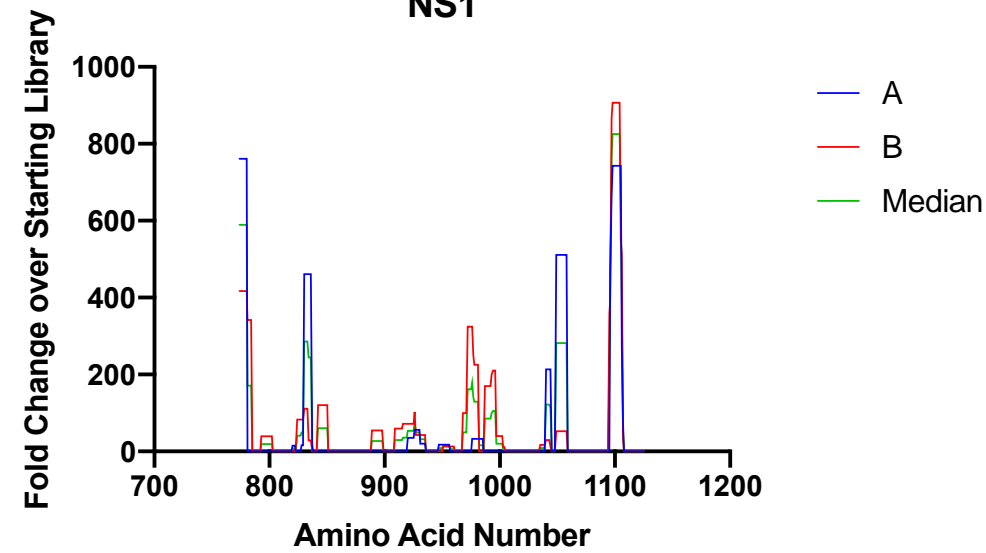

### Envelope

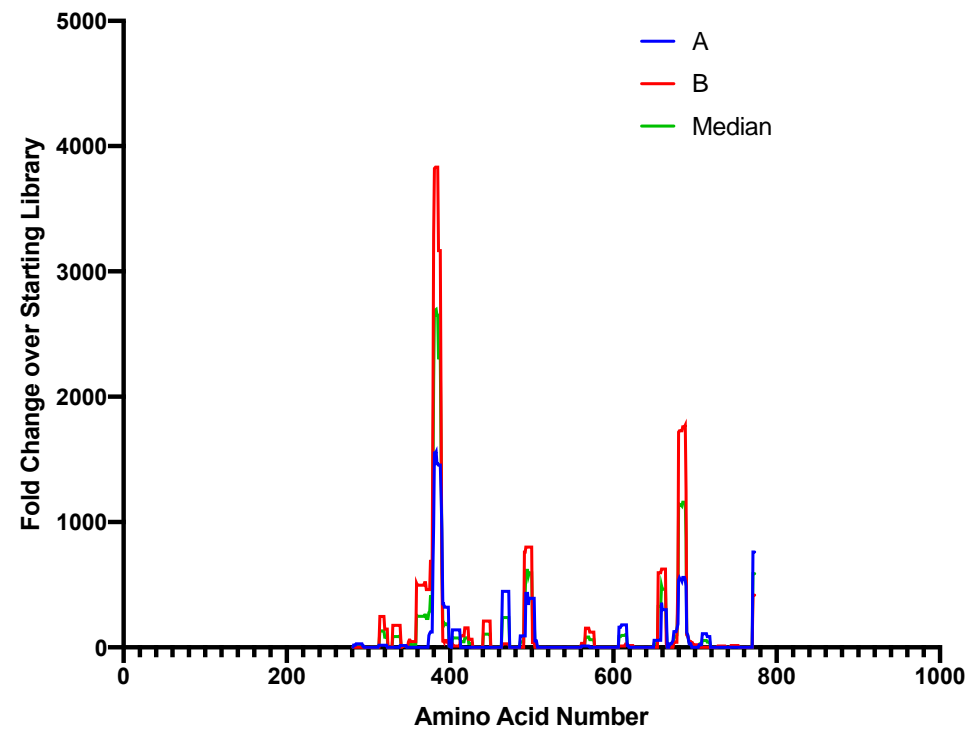

Supplement: viruses-12-01114-s001.pdf [file viruses-12-01114-s001.pdf]
